# Supplementary material for: DFT investigation of the mechanism and role of N-heterocyclic carbene (NHC) in constructing asymmetric organosilanes using NHC-catalyzed [4+2] cycloaddition reaction
Source: Royal Society of Chemistry journal article supplement (doi:10.1039/d4ra03676j), 2024-01-01
Supplement: d4ra03676j1.pdf [file d4ra03676j1.pdf]

Supporting Information for

Mechanism and role of N-heterocyclic carbene (NHC) for constructing asymmetric organosilanes using  
NHC-catalyzed [4+2] cycloaddition at density functional theory

Batoul Alipour\*

Department of Chemistry, Tarbiat Modares University, Tehran, Iran

\*Correspondence: Batoul Alipour

Department of Chemistry, Tarbiat Modares University, P.O. Box 14115 175, Tehran, Iran.

Email: [a.batoul@modares.ac.ir](mailto:a.batoul@modares.ac.ir)

Table of Contents

|                                                                                            |    |
|--------------------------------------------------------------------------------------------|----|
| 1. Optimized geometries of the stationary points .....                                     | S1 |
| 2. Absolute single-point energies and NIMAG of the optimized structures by the M06-2X..... | S6 |
| 3. The Cartesian coordinates of all the stationary points. ....                            | S8 |

1. Optimized geometries of the stationary points

Fig S1. Optimized and geometrical parameters of all the structures of the minima- and transition states in the IEF-PCM(1,4-DO)M06-2X in conjunction with 6-31G(d,p) level.

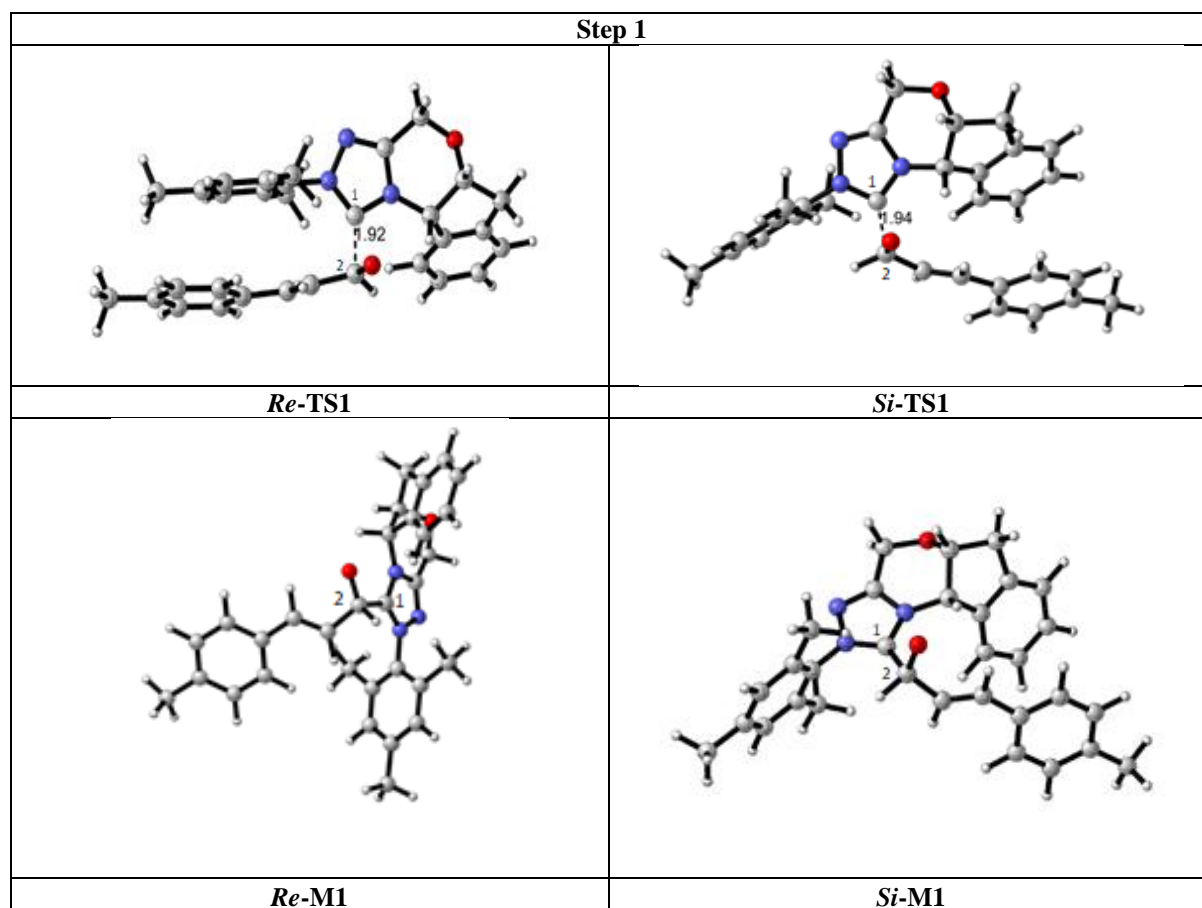

Step 2

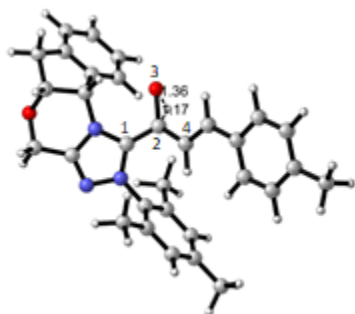

*Re-TS2D*

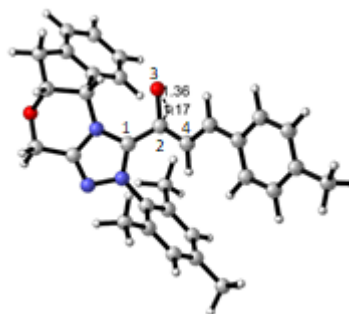

*Si-TS2D*

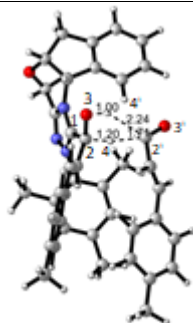

*Re-TS2B*

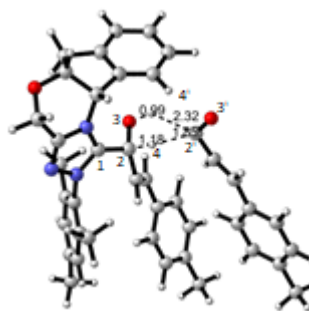

*Si-TS2B*

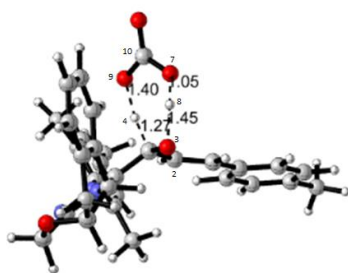

*Re-TS2BA1*

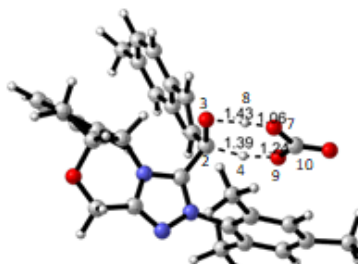

*Si-TS2BA1*

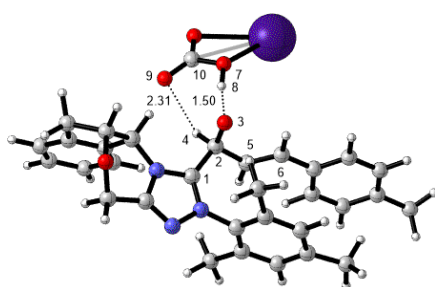

*Re-M02BA*

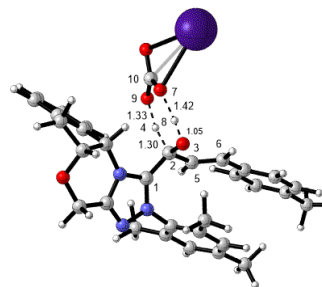

*Re-TS2BA*

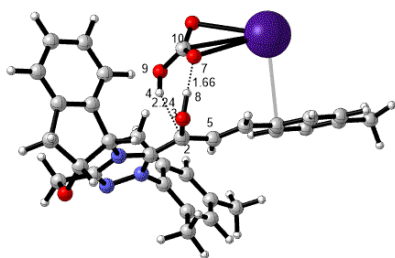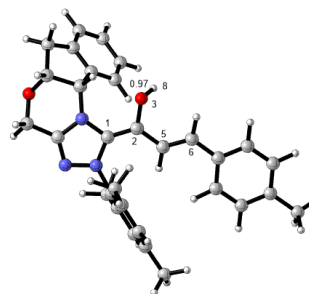

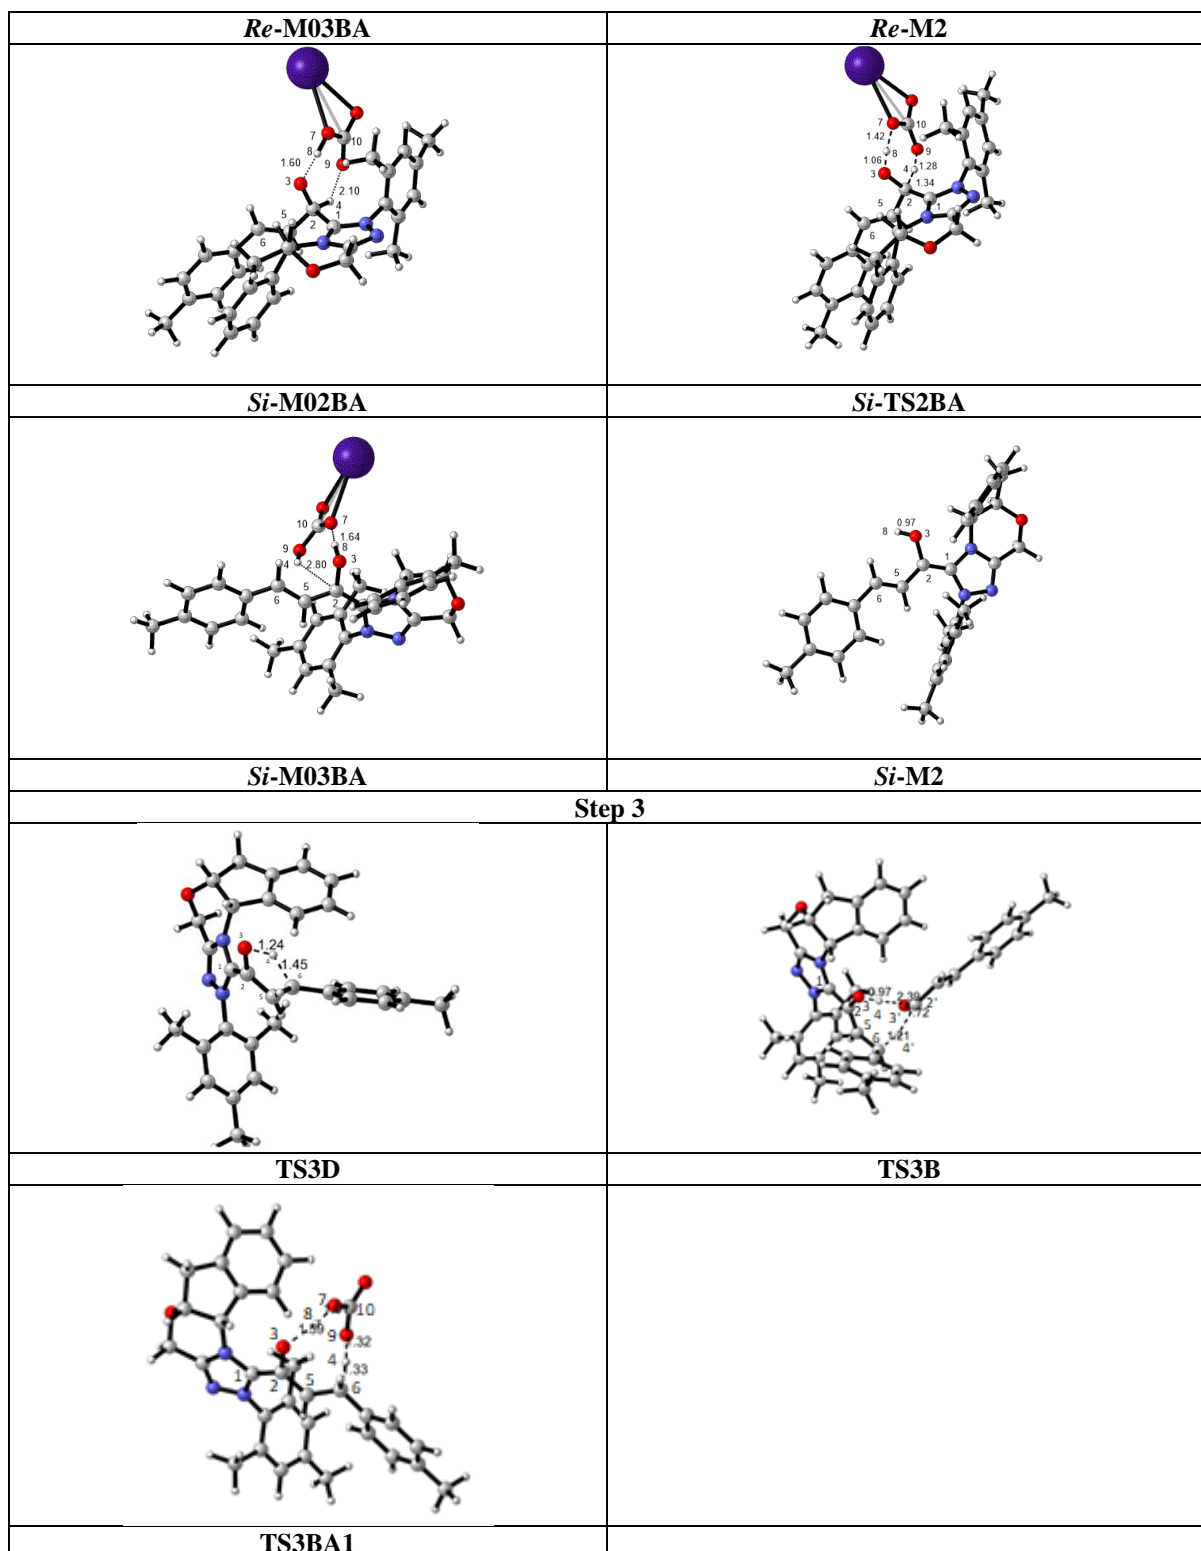

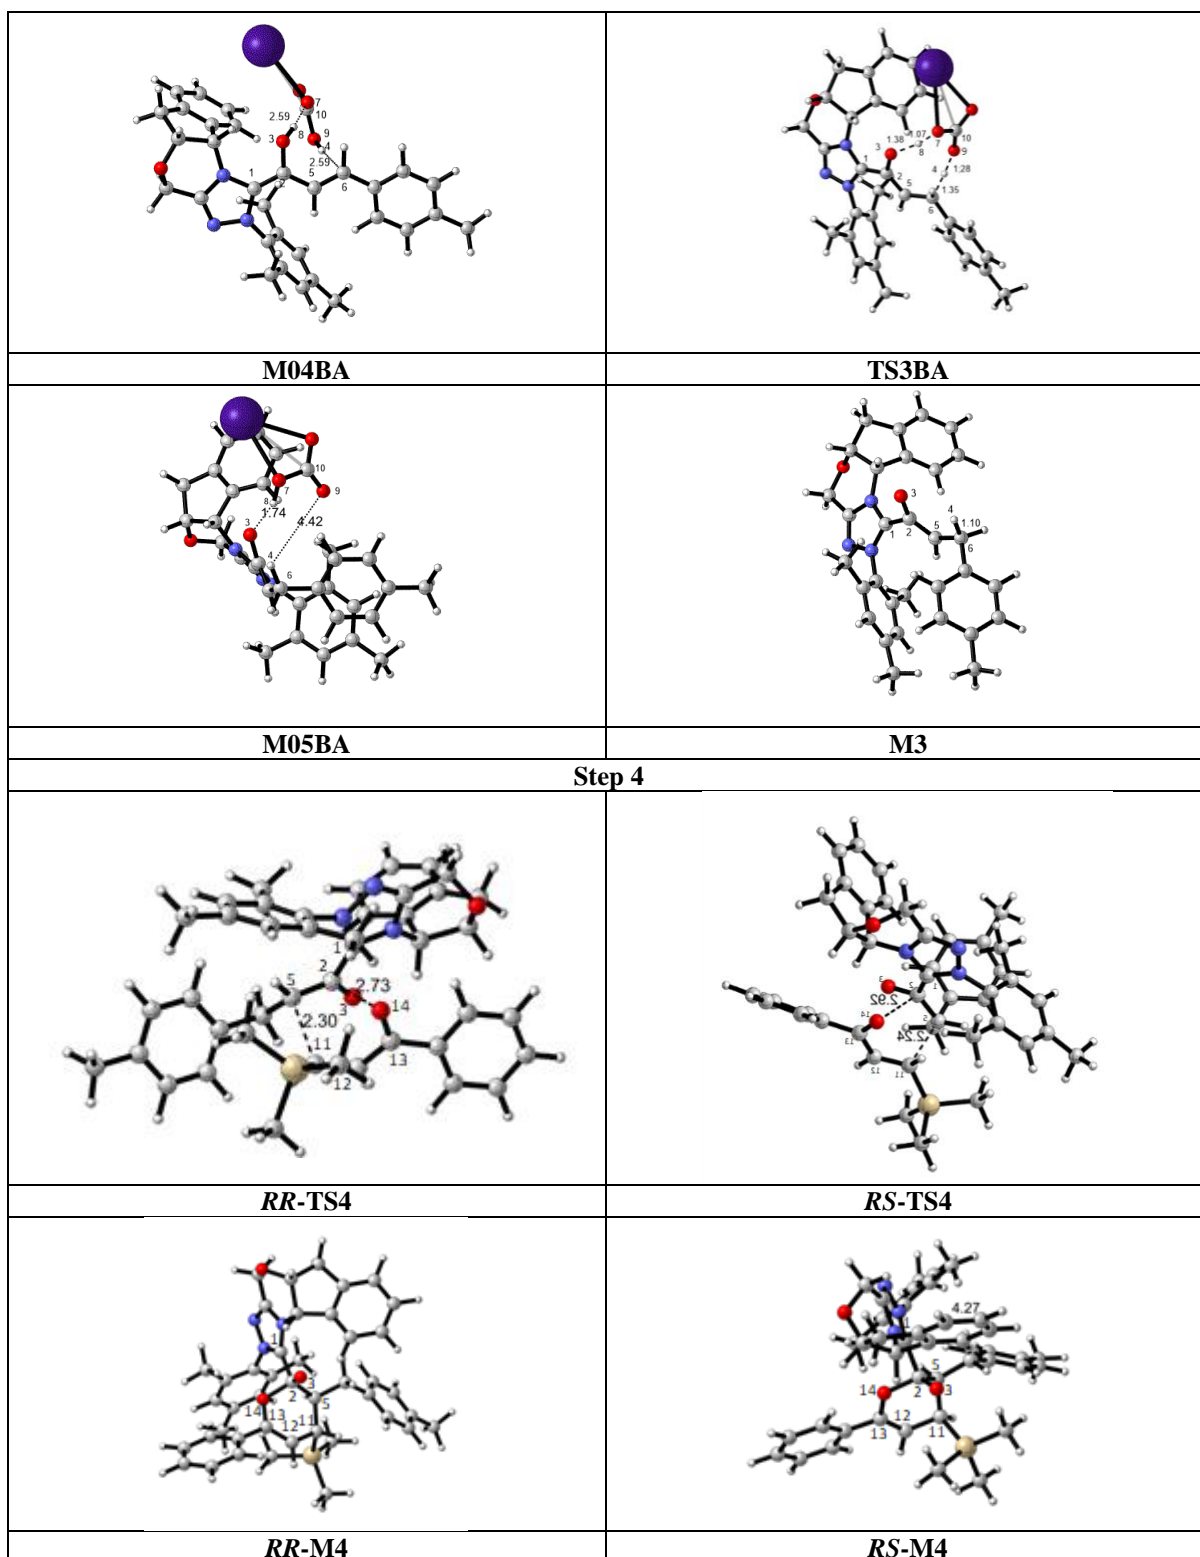

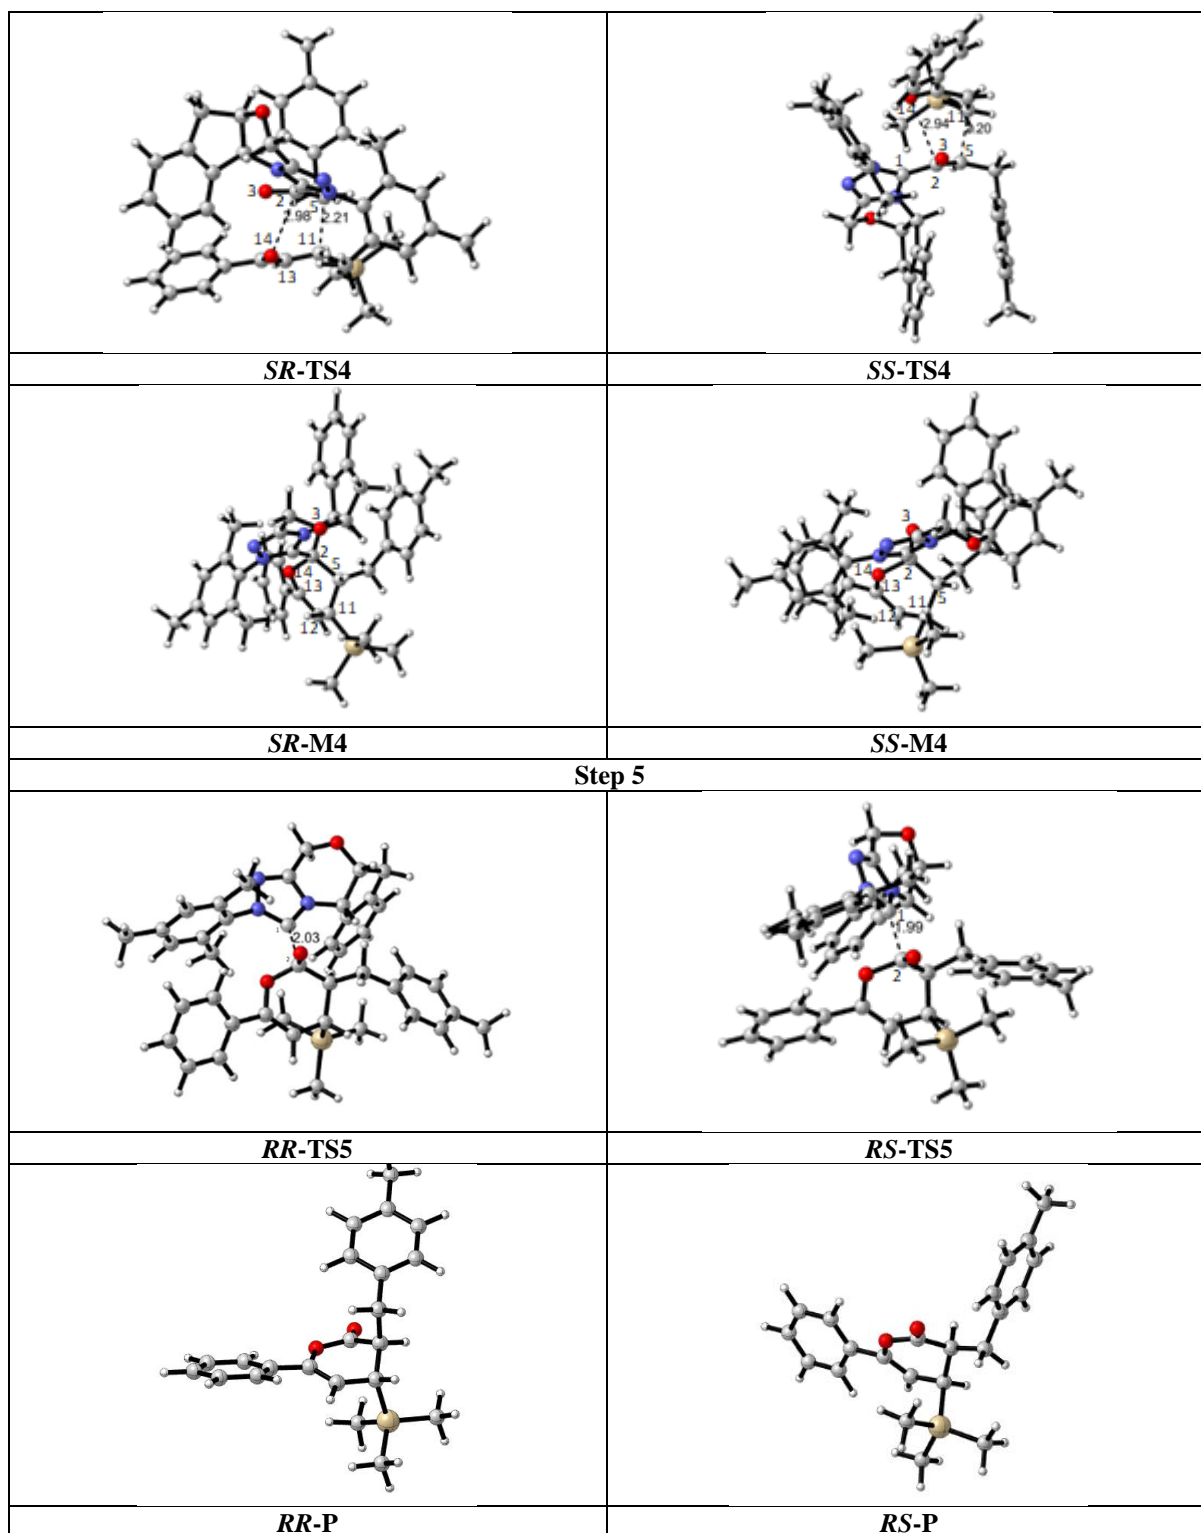

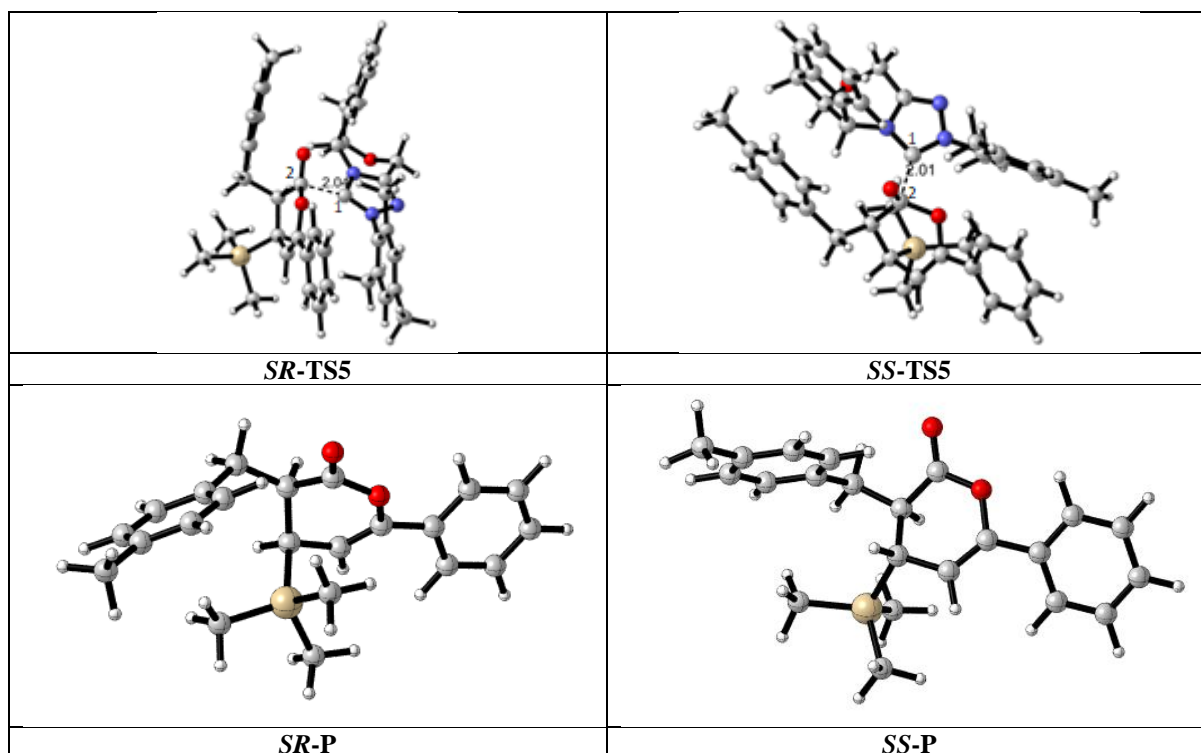

## 2. Absolute single-point energies and NIMAG of the optimized structures by the M06-2X

**Table S1.** The single point energies and NIMAG of all the structures of the minima- and transition states at IEF-PCM(1,4-DO)M06-2X in conjunction with 6-311++G(2df,2pd) (L2), level.

| SR                            | $E_{sp}$ (L2) | NIMAG    |
|-------------------------------|---------------|----------|
| CsHCO <sub>3</sub>            | -284.323      |          |
| HCO <sub>3</sub> <sup>-</sup> | -264.51921    |          |
| NHC                           | -1052.2318    |          |
| R1                            | -462.24097    |          |
| R2                            | -831.5817554  |          |
| <i>Si</i> -TS1                | -1514.476469  | -196.92  |
| <i>Re</i> -TS1                | -1514.479146  | -211.57  |
| <i>Si</i> -M1                 | -1514.481116  |          |
| <i>Re</i> -M1                 | -1514.483704  |          |
| <i>Si</i> -TS2D               | -1514.4209    | -1706.99 |
| <i>Si</i> -TS2B               | -1976.670612  | -218.76  |
| <i>Si</i> -M02BA              | -1798.823068  |          |
| <i>Si</i> -TS2BA              | -1798.801701  | -1282.66 |
| <i>Si</i> -M03BA              | -1798.852126  |          |
| <i>Si</i> -TS2BA1             | -1778.991139  | -1283.50 |
| <i>Re</i> -TS2D               | -1514.42      | -1759.41 |
| <i>Re</i> -TS2B               | -1976.687883  | -421.97  |
| <i>Re</i> -M02BA              | -1798.828328  |          |
| <i>Re</i> -TS2BA              | -1798.811058  | -1236.31 |
| <i>Re</i> -M03BA              | -1798.853957  |          |
| <i>Re</i> -TS2BA1             | -1779.00565   | -1022.55 |
| <i>Si</i> -M04637             | -1514.507885  |          |
| <i>Re</i> -M04637             | -1514.509305  |          |

|          |              |          |
|----------|--------------|----------|
| TS3D     | -1514.455392 | -1608.73 |
| TS3B     | -1976.675029 | -275.54  |
| M04BA    | -1798.857545 |          |
| TS3BA    | -1798.823137 | -1423.48 |
| M05BA    | -1798.854004 |          |
| TS3BA1   | -1779.01542  | -1370.72 |
| M3       | -1514.512784 |          |
| RR-TS4   | -2346.086485 | -289.65  |
| RS-TS4   | -2346.10225  | -216.21  |
| SR-TS4   | -2346.095664 | -230.50  |
| SS-TS4   | -2346.082434 | -240.79  |
| RR-M4    | -2346.114471 |          |
| RS-M4    | -2346.111115 |          |
| SR-M4    | -2346.120825 |          |
| SS-M4    | -2346.120796 |          |
| RR-TS5   | -2346.105568 | -140.07  |
| RS-TS5   | -2346.111115 | -149.14  |
| SR-TS5   | -2346.114855 | -148.79  |
| SS-TS5   | -2346.110119 | -171.61  |
| RR-P     | -1293.890146 |          |
| RS-P     | -1293.88954  |          |
| SR-P     | -1293.885204 |          |
| SS-P     | -1293.885896 |          |
| R1H      | -422.93076   |          |
| R1Cl     | -882.536     |          |
| Si-TS1H  | -1475.167153 | -206.05  |
| Re-TS1H  | -1475.168983 | -211.57  |
| Si-TS1Cl | -1934.773475 | -204.82  |
| Re-TS1Cl | -1934.776315 | -208.68  |
| RR-TS4H  | -2306.777248 | -289.34  |
| RS-TS4H  | -2306.793194 | -221.08  |
| SR-TS4H  | -2306.786649 | -233.22  |
| SS-TS4H  | -2306.771944 | -245.25  |
| RR-TS4Cl | -2766.383335 | -295.33  |
| RS-TS4Cl | -2766.399661 | -226.79  |
| SR-TS4Cl | -2766.39292  | -244.45  |
| SS-TS4Cl | -2766.38003  | -265.02  |
| NHC1     | -1052.2276   |          |
| Re-TS1'  | -1883.814368 | -299.31  |
| Si-TS1'  | -1883.812557 | -335.83  |

### 3. The Cartesian coordinates of all the stationary points.

CsHCO<sub>3</sub>

Zero-point correction= 0.028768 (Hartree/Particle)

|    |             |             |             |
|----|-------------|-------------|-------------|
| C  | -1.99826700 | 0.04290800  | -0.00009400 |
| O  | -1.42852100 | 1.15178100  | -0.00022600 |
| O  | -3.37501600 | 0.07419800  | 0.00025600  |
| H  | -3.62938100 | -0.85627000 | 0.00071000  |
| O  | -1.47425100 | -1.10416700 | -0.00029100 |
| Cs | 1.19711400  | -0.00683100 | 0.00003500  |

HCO<sub>3</sub>

Zero-point correction= 0.027102 (Hartree/Particle)

|   |             |             |             |
|---|-------------|-------------|-------------|
| C | -1.99826700 | 0.04290800  | -0.00009400 |
| O | -1.42852100 | 1.15178100  | -0.00022600 |
| O | -3.37501600 | 0.07419800  | 0.00025600  |
| H | -3.62938100 | -0.85627000 | 0.00071000  |
| O | -1.47425100 | -1.10416700 | -0.00029100 |

CsCl

R1

Zero-point correction= 0.172398 (Hartree/Particle)

|   |             |             |             |
|---|-------------|-------------|-------------|
| C | -0.67169200 | 1.29215000  | -0.00145500 |
| C | -1.93597900 | -1.17317100 | -0.00394600 |
| C | -2.06082300 | 1.22375700  | -0.00316800 |
| C | 0.10693500  | 0.12955100  | -0.00071000 |
| C | -0.55273800 | -1.11031900 | -0.00214300 |
| C | -2.71551200 | -0.00779400 | -0.00345000 |
| C | 1.56368700  | 0.25612500  | -0.00006000 |
| C | 2.47285700  | -0.73253200 | 0.00100100  |



|   |             |             |             |
|---|-------------|-------------|-------------|
| C | 3.91221100  | -0.41085900 | 0.00178600  |
| O | 4.36320900  | 0.71683400  | 0.00159000  |
| H | 4.59469900  | -1.28314300 | 0.00259200  |
| C | -4.21846400 | -0.09786100 | 0.00637100  |
| H | -0.17812200 | 2.26011500  | -0.00200100 |
| H | -2.42962900 | -2.14140400 | -0.00659500 |
| H | -2.64499500 | 2.13953100  | -0.00488900 |
| H | 0.02197100  | -2.03114400 | -0.00341600 |
| H | 1.95715000  | 1.27267800  | -0.00023600 |
| H | 2.19936700  | -1.78339300 | 0.00136700  |
| H | -4.57583100 | -0.52356800 | 0.94919500  |
| H | -4.67579000 | 0.88593000  | -0.11483600 |
| H | -4.57737800 | -0.74455400 | -0.79926100 |

R2

Zero-point correction= 0.247353 (Hartree/Particle)

|   |             |             |             |
|---|-------------|-------------|-------------|
| C | -1.53807300 | -0.72886900 | 0.15207300  |
| H | -1.52128600 | -1.78427300 | 0.43552100  |
| C | -0.33762200 | -0.16980500 | -0.04676300 |
| H | -0.24685800 | 0.87185300  | -0.34365700 |
| C | 0.91638200  | -0.97362900 | 0.10151800  |
| O | 0.86793600  | -2.18158300 | 0.25802400  |
| C | 2.24116100  | -0.27593900 | 0.03702500  |
| C | 3.38181700  | -1.06344900 | -0.15385600 |
| C | 2.37856000  | 1.10737100  | 0.18520300  |
| C | 4.63847400  | -0.47670000 | -0.21355900 |
| H | 3.25501900  | -2.13609300 | -0.25420100 |
| C | 3.64049100  | 1.69362200  | 0.13774100  |
| H | 1.51079100  | 1.73348000  | 0.36226100  |

|    |             |             |             |
|----|-------------|-------------|-------------|
| C  | 4.76889000  | 0.90461300  | -0.06796300 |
| H  | 5.51805500  | -1.09220300 | -0.37095700 |
| H  | 3.74183800  | 2.76658900  | 0.26237600  |
| H  | 5.75089500  | 1.36471300  | -0.11164800 |
| Si | -3.17547900 | 0.17896800  | -0.02943200 |
| C  | -4.19497500 | -0.67960000 | -1.35652500 |
| H  | -5.16819000 | -0.19184900 | -1.46882200 |
| H  | -3.68744800 | -0.64969600 | -2.32464700 |
| H  | -4.37209500 | -1.72813100 | -1.10032100 |
| C  | -2.83381400 | 1.96246500  | -0.51697600 |
| H  | -3.77364300 | 2.51154000  | -0.62858600 |
| H  | -2.23638900 | 2.47695800  | 0.24180500  |
| H  | -2.29902800 | 2.02141600  | -1.46973000 |
| C  | -4.08358600 | 0.11345900  | 1.61653000  |
| H  | -3.51145900 | 0.61316400  | 2.40318400  |
| H  | -5.05641800 | 0.60860900  | 1.53890400  |
| H  | -4.25679800 | -0.92018500 | 1.92968100  |

NHC

Zero-point correction= 0.383831 (Hartree/Particle)

|   |             |             |             |
|---|-------------|-------------|-------------|
| C | -2.23701500 | 1.94392100  | 0.29257000  |
| C | -4.85547000 | 1.53799700  | -0.65623700 |
| C | -2.93340000 | 2.97897100  | -0.33283200 |
| C | -2.85888800 | 0.70880900  | 0.42160400  |
| C | -4.15993400 | 0.50520300  | -0.04096800 |
| C | -4.23023100 | 2.77687200  | -0.80348400 |
| C | -4.60834800 | -0.90983900 | 0.24715700  |
| C | -3.28780000 | -1.65010600 | 0.48012900  |
| C | -2.34759900 | -0.56422000 | 1.06863000  |

|   |             |             |             |
|---|-------------|-------------|-------------|
| N | -0.96146100 | -0.91068900 | 0.81779900  |
| C | -0.56780400 | -1.75219000 | -0.19107200 |
| C | -1.57415300 | -2.70264300 | -0.75304400 |
| O | -2.83612200 | -2.06829900 | -0.79770400 |
| N | 0.66878100  | -1.63329000 | -0.54135600 |
| N | 1.19070800  | -0.60899300 | 0.25207000  |
| C | 0.18036800  | -0.14810500 | 1.10421700  |
| C | 2.49761900  | -0.13764300 | 0.09446600  |
| C | 5.12978000  | 0.82338400  | -0.17569600 |
| C | 3.55782100  | -1.04854800 | -0.10138600 |
| C | 2.75110000  | 1.24824100  | 0.16944600  |
| C | 4.06438600  | 1.69402900  | 0.04406000  |
| C | 4.84525800  | -0.53982400 | -0.25117700 |
| C | 3.34561500  | -2.54036500 | -0.10124000 |
| C | 1.63612000  | 2.25021900  | 0.32407500  |
| C | 6.54274500  | 1.33443600  | -0.29224700 |
| H | -1.22798900 | 2.09856000  | 0.66248100  |
| H | -5.86454000 | 1.38307700  | -1.02695300 |
| H | -2.46125400 | 3.94850500  | -0.45464200 |
| H | -4.75722800 | 3.59038200  | -1.29186000 |
| H | -5.23053900 | -0.94767900 | 1.14872300  |
| H | -5.16376500 | -1.37450000 | -0.57091600 |
| H | -3.37364700 | -2.51897000 | 1.14720400  |
| H | -2.49621400 | -0.51790500 | 2.15637200  |
| H | -1.62126400 | -3.61099100 | -0.13347200 |
| H | -1.29898100 | -2.97884700 | -1.77124400 |
| H | 4.25416500  | 2.76442700  | 0.09503300  |
| H | 5.66077400  | -1.24363300 | -0.40572000 |

|   |            |             |             |
|---|------------|-------------|-------------|
| H | 4.30468000 | -3.05030700 | 0.01384800  |
| H | 2.86936800 | -2.88623500 | -1.02122700 |
| H | 2.68945300 | -2.83946000 | 0.72149600  |
| H | 2.02641100 | 3.26440500  | 0.21543200  |
| H | 0.86016700 | 2.09538200  | -0.43246200 |
| H | 1.14947200 | 2.18230300  | 1.30528000  |
| H | 7.02696900 | 1.38936500  | 0.68899100  |
| H | 6.56537700 | 2.33828700  | -0.72450800 |
| H | 7.15034800 | 0.67942400  | -0.92164700 |

Si-TS1 -210.01

Zero-point correction= 0.558357 (Hartree/Particle)

|   |             |             |             |
|---|-------------|-------------|-------------|
| C | 4.03690000  | -3.34670000 | -0.43797200 |
| C | 2.82914200  | -2.97888500 | 0.14024600  |
| C | 2.76976600  | -1.93751500 | 1.07536500  |
| C | 3.96563200  | -1.30175000 | 1.42623300  |
| C | 5.17177500  | -1.66950400 | 0.84166000  |
| C | 5.22891300  | -2.69633600 | -0.10243100 |
| H | 4.06021700  | -4.15700800 | -1.16287900 |
| H | 1.92071500  | -3.50814600 | -0.13352800 |
| H | 3.93863600  | -0.48312700 | 2.14120400  |
| H | 6.08389800  | -1.14529000 | 1.11557000  |
| C | 1.50422000  | -1.42995200 | 1.62348300  |
| H | 1.56288100  | -0.80496900 | 2.51467200  |
| C | 0.29848500  | -1.56857700 | 1.06741800  |
| C | -0.90572400 | -0.86891400 | 1.63215000  |
| H | 0.13879800  | -2.14740800 | 0.15813500  |
| O | -0.79997200 | -0.09929300 | 2.61887500  |
| H | -1.83871000 | -1.45652300 | 1.49316600  |

|   |             |             |             |
|---|-------------|-------------|-------------|
| C | 2.03194400  | 0.28760900  | -1.12749100 |
| C | 4.06803300  | 2.21014400  | -0.84823200 |
| C | 3.24932000  | 0.13153900  | -1.78938000 |
| C | 1.85308000  | 1.40236500  | -0.32164000 |
| C | 2.85288500  | 2.36855700  | -0.19484400 |
| C | 4.26197000  | 1.07892400  | -1.64122600 |
| C | 2.38825300  | 3.49766800  | 0.69817600  |
| C | 0.86928100  | 3.30910500  | 0.72013800  |
| C | 0.68803400  | 1.78302300  | 0.56715100  |
| N | -0.64603000 | 1.49740200  | 0.05095800  |
| C | -1.49227100 | 2.45345400  | -0.44437300 |
| C | -1.04723700 | 3.88292800  | -0.53617500 |
| O | 0.35491400  | 3.96436400  | -0.43355200 |
| N | -2.66444800 | 1.95254100  | -0.69789700 |
| N | -2.52250700 | 0.63253000  | -0.32880500 |
| C | -1.31320700 | 0.32043700  | 0.14364200  |
| C | -3.65810700 | -0.24265900 | -0.34559800 |
| C | -5.84913000 | -1.93252800 | -0.34206500 |
| C | -4.45627600 | -0.29230400 | 0.80022800  |
| C | -3.91351600 | -1.00092500 | -1.48811200 |
| C | -5.02361000 | -1.84365500 | -1.46435100 |
| C | -5.55393300 | -1.15132000 | 0.77655000  |
| C | -4.13217200 | 0.56055300  | 1.99861300  |
| C | -3.01243200 | -0.89720400 | -2.68923700 |
| C | -7.02395200 | -2.87648000 | -0.32915000 |
| H | 1.24667300  | -0.45625900 | -1.22524600 |
| H | 4.84986800  | 2.95790500  | -0.75136600 |
| H | 3.41640400  | -0.74497600 | -2.40721400 |

|   |             |             |             |
|---|-------------|-------------|-------------|
| H | 5.20807800  | 0.93778000  | -2.15455600 |
| H | 2.79343500  | 3.39801300  | 1.71161300  |
| H | 2.64677600  | 4.49081500  | 0.32279900  |
| H | 0.38126300  | 3.69985500  | 1.62301000  |
| H | 0.74272700  | 1.28185600  | 1.54250100  |
| H | -1.53571400 | 4.45623100  | 0.26567500  |
| H | -1.33584900 | 4.31369500  | -1.49635700 |
| H | -5.25018800 | -2.44294300 | -2.34288500 |
| H | -6.19450200 | -1.20867600 | 1.65317100  |
| H | -4.86367300 | 0.39649200  | 2.79176000  |
| H | -4.15203200 | 1.62096800  | 1.72638200  |
| H | -3.13106200 | 0.34659100  | 2.39401100  |
| H | -3.37092100 | -1.53418700 | -3.49930800 |
| H | -2.96381500 | 0.13404600  | -3.05135300 |
| H | -1.99073200 | -1.19924100 | -2.43701700 |
| H | -7.44878100 | -2.99361200 | -1.32876300 |
| H | -7.80977000 | -2.52004500 | 0.34051500  |
| H | -6.71723400 | -3.86837000 | 0.01848200  |
| C | 6.53953500  | -3.11432600 | -0.71738300 |
| H | 7.23763700  | -2.27494400 | -0.76697400 |
| H | 7.01593600  | -3.90435400 | -0.12699900 |
| H | 6.39678700  | -3.50266500 | -1.72895900 |

*Re-TS1* -213.28

Zero-point correction= 0.558625 (Hartree/Particle)

|   |             |             |            |
|---|-------------|-------------|------------|
| C | -3.61071400 | -1.70114800 | 1.22344800 |
| C | -6.38925100 | -1.60391000 | 0.77901900 |
| C | -4.48705900 | -2.39429700 | 2.05874000 |
| C | -4.14190100 | -0.96747800 | 0.17223300 |

|   |             |             |             |
|---|-------------|-------------|-------------|
| C | -5.51809600 | -0.90857600 | -0.04925700 |
| C | -5.86285000 | -2.34934100 | 1.83451000  |
| C | -5.82385700 | -0.02215900 | -1.23562400 |
| C | -4.53813400 | 0.79558900  | -1.39551400 |
| C | -3.42711400 | -0.15170000 | -0.88244000 |
| N | -2.29925100 | 0.62676700  | -0.38732300 |
| C | -2.29681000 | 1.98722700  | -0.25195200 |
| C | -3.53306800 | 2.76909600  | -0.57753700 |
| O | -4.65519400 | 1.91681800  | -0.52898500 |
| N | -1.12724800 | 2.41368500  | 0.12031900  |
| N | -0.38510400 | 1.25562500  | 0.20989900  |
| C | -1.06618100 | 0.14713800  | -0.09783300 |
| C | 1.00658200  | 1.34232300  | 0.55344500  |
| C | 3.69450600  | 1.50268500  | 1.19515400  |
| C | 1.91973500  | 1.59916600  | -0.46936100 |
| C | 1.38434100  | 1.15306800  | 1.88325400  |
| C | 2.74294100  | 1.23645100  | 2.18246900  |
| C | 3.26733200  | 1.67942900  | -0.12033200 |
| C | 1.44856800  | 1.73630200  | -1.89179400 |
| C | 0.35191900  | 0.85639700  | 2.93820900  |
| C | 5.15470300  | 1.61279500  | 1.55071600  |
| H | -2.53827700 | -1.72213800 | 1.40108700  |
| H | -7.46228500 | -1.55853300 | 0.61800200  |
| H | -4.09593000 | -2.97014300 | 2.89120500  |
| H | -6.53149600 | -2.89301800 | 2.49431700  |
| H | -6.00652300 | -0.61729500 | -2.13736200 |
| H | -6.67998300 | 0.63941000  | -1.08325200 |
| H | -4.35134100 | 1.13564200  | -2.42265000 |

|   |             |             |             |
|---|-------------|-------------|-------------|
| H | -3.03173100 | -0.77643000 | -1.69460400 |
| H | -3.42551700 | 3.22291200  | -1.57361500 |
| H | -3.68578300 | 3.56348300  | 0.15421900  |
| H | 3.06610700  | 1.08853800  | 3.21049100  |
| H | 4.00400100  | 1.85315600  | -0.90084300 |
| H | 2.30065000  | 1.79275000  | -2.57255100 |
| H | 0.84558600  | 2.64201500  | -2.01618700 |
| H | 0.82647600  | 0.87919800  | -2.17870800 |
| H | -0.42589300 | 1.62588100  | 2.95226200  |
| H | -0.14448100 | -0.10057700 | 2.74346500  |
| H | 0.81157300  | 0.80895100  | 3.92688000  |
| H | 5.44201000  | 0.84209100  | 2.27199800  |
| H | 5.37289200  | 2.58717800  | 2.00069300  |
| H | 5.78215700  | 1.49731500  | 0.66344100  |
| C | -0.56697400 | -1.44763100 | -1.05117300 |
| H | -1.28192400 | -2.10956400 | -0.51346800 |
| C | 0.83476900  | -1.60715000 | -0.53566000 |
| H | 0.95089700  | -1.68666400 | 0.54471700  |
| C | 1.87748600  | -1.57905700 | -1.36736000 |
| H | 1.65386500  | -1.45945500 | -2.42693700 |
| C | 3.29256100  | -1.55985800 | -0.97512400 |
| C | 4.24844300  | -1.12573600 | -1.89767000 |
| C | 3.72686200  | -1.87351800 | 0.32145200  |
| C | 5.58383500  | -0.97271800 | -1.53266500 |
| H | 3.93377300  | -0.88127700 | -2.90933400 |
| C | 5.05721300  | -1.72639600 | 0.67942900  |
| H | 3.01282700  | -2.23264400 | 1.05673200  |
| C | 6.01034100  | -1.26467900 | -0.23795900 |



|   |             |             |             |
|---|-------------|-------------|-------------|
| H | 6.30510400  | -0.62063700 | -2.26587900 |
| H | 5.37107200  | -1.97232600 | 1.69162700  |
| C | 7.44791600  | -1.09050300 | 0.17738800  |
| H | 7.53780900  | -0.33990400 | 0.97029000  |
| H | 7.86245500  | -2.02505800 | 0.56716900  |
| H | 8.06747400  | -0.76928300 | -0.66285100 |
| O | -0.78638300 | -1.16018900 | -2.25624900 |

Si-M1

Zero-point correction= 0.560008 (Hartree/Particle)

|   |             |             |             |
|---|-------------|-------------|-------------|
| C | -4.00087500 | -3.43341700 | 0.58097500  |
| C | -2.77313400 | -3.00907300 | 0.08738900  |
| C | -2.70036500 | -2.04478400 | -0.92566100 |
| C | -3.90292800 | -1.54376600 | -1.43892000 |
| C | -5.12871600 | -1.96730900 | -0.94051700 |
| C | -5.20023900 | -2.91893400 | 0.07961400  |
| H | -4.03305900 | -4.18278000 | 1.36834900  |
| H | -1.85828500 | -3.43600600 | 0.48891600  |
| H | -3.86746900 | -0.78963700 | -2.22113400 |
| H | -6.04759100 | -1.55097600 | -1.34606600 |
| C | -1.42872800 | -1.48221400 | -1.40356100 |
| H | -1.43631900 | -0.92708200 | -2.34157400 |
| C | -0.26950300 | -1.49340800 | -0.74497800 |
| C | -6.53161800 | -3.39917800 | 0.59772600  |
| H | -6.95047200 | -4.17243100 | -0.05498500 |
| H | -6.43650700 | -3.82785500 | 1.59824500  |
| H | -7.25624100 | -2.58179400 | 0.64213700  |
| C | 0.94089100  | -0.74640000 | -1.28708900 |
| H | -0.15449000 | -1.99993500 | 0.21568800  |

|   |             |             |             |
|---|-------------|-------------|-------------|
| O | 0.79007300  | -0.09242300 | -2.43167100 |
| H | 1.80435000  | -1.45614200 | -1.23186500 |
| C | -2.18724800 | 0.46757200  | 1.08661600  |
| C | -4.10123800 | 2.47755800  | 0.63510300  |
| C | -3.44165300 | 0.40114900  | 1.69315200  |
| C | -1.91046000 | 1.53209800  | 0.24138200  |
| C | -2.85162200 | 2.54465000  | 0.03514700  |
| C | -4.39459500 | 1.39063900  | 1.45995600  |
| C | -2.27922900 | 3.62467400  | -0.85645900 |
| C | -0.77559100 | 3.36589300  | -0.75354900 |
| C | -0.68905300 | 1.83298100  | -0.60541500 |
| N | 0.61782300  | 1.48812200  | -0.04562100 |
| C | 1.45014000  | 2.39006500  | 0.55771100  |
| C | 1.02630700  | 3.82034600  | 0.72713300  |
| O | -0.34604200 | 3.97276600  | 0.46222200  |
| N | 2.62151800  | 1.87451400  | 0.78957000  |
| N | 2.51722300  | 0.60078500  | 0.28648600  |
| C | 1.32465700  | 0.35530100  | -0.25273200 |
| C | 3.65756900  | -0.27220700 | 0.28384900  |
| C | 5.85182800  | -1.94967100 | 0.26431200  |
| C | 4.42211600  | -0.34332300 | -0.88390600 |
| C | 3.94236800  | -1.00107500 | 1.43796800  |
| C | 5.05532700  | -1.83975200 | 1.40487600  |
| C | 5.52057500  | -1.20065200 | -0.86710600 |
| C | 4.05914000  | 0.47539900  | -2.09441300 |
| C | 3.06760800  | -0.88012000 | 2.65686200  |
| C | 7.06594200  | -2.84235700 | 0.25951400  |
| H | -1.45156200 | -0.30926700 | 1.26497600  |

|   |             |             |             |
|---|-------------|-------------|-------------|
| H | -4.83401300 | 3.26329400  | 0.47630800  |
| H | -3.67961700 | -0.43915600 | 2.33748000  |
| H | -5.36880500 | 1.32110100  | 1.93354600  |
| H | -2.60836300 | 3.50641500  | -1.89510000 |
| H | -2.52290000 | 4.63858200  | -0.53065900 |
| H | -0.18705200 | 3.74363300  | -1.59975900 |
| H | -0.71270600 | 1.32224200  | -1.57818800 |
| H | 1.63501100  | 4.43492200  | 0.04787900  |
| H | 1.20450300  | 4.15628600  | 1.75029300  |
| H | 5.30221500  | -2.42309800 | 2.28833400  |
| H | 6.13261600  | -1.28431000 | -1.76176100 |
| H | 4.76414000  | 0.28427600  | -2.90522200 |
| H | 4.09932300  | 1.54322100  | -1.85214400 |
| H | 3.04036900  | 0.25964300  | -2.44656400 |
| H | 3.42891800  | -1.52673700 | 3.45774200  |
| H | 3.04850700  | 0.15061800  | 3.02299100  |
| H | 2.03455200  | -1.16245000 | 2.42725500  |
| H | 6.97193300  | -3.64174800 | 0.99766000  |
| H | 7.96610100  | -2.26872800 | 0.50285400  |
| H | 7.21866700  | -3.29489900 | -0.72295400 |

*Re-M1*

Zero-point correction= 0.559256 (Hartree/Particle)

|   |            |             |             |
|---|------------|-------------|-------------|
| C | 3.73441200 | -0.25639400 | -1.78699100 |
| C | 6.16579100 | -1.38923100 | -0.92033100 |
| C | 4.88832500 | -0.14499300 | -2.56202800 |
| C | 3.82373800 | -0.91342000 | -0.56785200 |
| C | 5.02104100 | -1.48690000 | -0.14000100 |
| C | 6.09266700 | -0.70406000 | -2.13278500 |

|   |             |             |             |
|---|-------------|-------------|-------------|
| C | 4.82629900  | -2.18453300 | 1.18680600  |
| C | 3.56023500  | -1.51876100 | 1.72825700  |
| C | 2.74328000  | -1.19902400 | 0.45287100  |
| N | 1.82485500  | -0.07165400 | 0.72368100  |
| C | 1.93463100  | 0.73011900  | 1.83098800  |
| C | 2.94107800  | 0.43026800  | 2.89758500  |
| O | 3.99751000  | -0.31863100 | 2.35822600  |
| N | 1.03602800  | 1.66856200  | 1.83356700  |
| N | 0.33056600  | 1.43940500  | 0.68482100  |
| C | 0.78097600  | 0.38479700  | 0.00029500  |
| C | -0.76850200 | 2.29417400  | 0.33540900  |
| C | -2.90364900 | 3.90578800  | -0.36514900 |
| C | -1.98975500 | 2.09631900  | 0.98657900  |
| C | -0.56395200 | 3.27947700  | -0.63080700 |
| C | -1.65758600 | 4.07713200  | -0.96824800 |
| C | -3.04984900 | 2.91894200  | 0.61407200  |
| C | -2.14306400 | 1.01558700  | 2.02238600  |
| C | 0.78792800  | 3.47856200  | -1.26399200 |
| H | 2.77766200  | 0.11768400  | -2.13453600 |
| H | 7.10133500  | -1.83117600 | -0.58996100 |
| H | 4.84589500  | 0.37064600  | -3.51612500 |
| H | 6.97973400  | -0.61080600 | -2.75160800 |
| H | 4.65883100  | -3.25803100 | 1.04428300  |
| H | 5.65393700  | -2.05477100 | 1.88804900  |
| H | 2.99760900  | -2.13151300 | 2.44545500  |
| H | 2.11363200  | -2.02447200 | 0.11701800  |
| H | 2.44303000  | -0.11424500 | 3.71420000  |
| H | 3.34903100  | 1.35994000  | 3.29696800  |

|   |             |             |             |
|---|-------------|-------------|-------------|
| H | -1.52902200 | 4.85304800  | -1.71842100 |
| H | -4.01389900 | 2.78567500  | 1.09903100  |
| H | -3.16685200 | 0.98454300  | 2.39882300  |
| H | -1.46479900 | 1.18286800  | 2.86407900  |
| H | -1.90539200 | 0.03561700  | 1.59122400  |
| H | 0.78755700  | 4.36937000  | -1.89362000 |
| H | 1.56299500  | 3.59458400  | -0.50053600 |
| H | 1.06560900  | 2.62240400  | -1.88747100 |
| C | 0.22807600  | -0.31441100 | -1.29986000 |
| H | 0.25361600  | 0.52365900  | -2.05480700 |
| C | -1.26583700 | -0.53753700 | -1.00512500 |
| H | -1.91666400 | 0.33466900  | -0.96501200 |
| C | -1.73617300 | -1.77554300 | -0.85107300 |
| H | -1.00989300 | -2.57808400 | -0.97422900 |
| C | -3.12978000 | -2.14819300 | -0.56093500 |
| C | -3.50858400 | -3.49409000 | -0.61982100 |
| C | -4.11079400 | -1.21095000 | -0.20370900 |
| C | -4.81399800 | -3.88928000 | -0.34742100 |
| H | -2.76287300 | -4.23904700 | -0.88519800 |
| C | -5.41237900 | -1.60894400 | 0.06850000  |
| H | -3.84977000 | -0.15749800 | -0.13021300 |
| C | -5.79034300 | -2.95414500 | -0.00202700 |
| H | -5.07917600 | -4.94227300 | -0.40093100 |
| H | -6.15389400 | -0.86381000 | 0.34734400  |
| C | -7.21261900 | -3.37418100 | 0.26522600  |
| H | -7.25895300 | -4.39866000 | 0.64250300  |
| H | -7.68836900 | -2.71726900 | 0.99783900  |
| H | -7.81149500 | -3.33326100 | -0.65085900 |

|   |             |             |             |
|---|-------------|-------------|-------------|
| O | 0.93665300  | -1.38286400 | -1.57348800 |
| C | -4.07799200 | 4.75486700  | -0.77695700 |
| H | -3.75098800 | 5.73086500  | -1.14197000 |
| H | -4.63671200 | 4.26900400  | -1.58330100 |
| H | -4.76687800 | 4.90947600  | 0.05642900  |

Si-TS2D -1706.99

Zero-point correction= 0.555256 (Hartree/Particle)

|   |             |             |             |
|---|-------------|-------------|-------------|
| C | 3.92943048  | -3.57573988 | -0.64507720 |
| C | 2.72409248  | -3.06886788 | -0.17593020 |
| C | 2.69288348  | -2.13656788 | 0.87038880  |
| C | 3.91461548  | -1.75127288 | 1.43568980  |
| C | 5.11884948  | -2.25870888 | 0.96202180  |
| C | 5.14897148  | -3.17999388 | -0.08682920 |
| H | 3.92714648  | -4.29793788 | -1.45812120 |
| H | 1.79286048  | -3.40934788 | -0.62018820 |
| H | 3.91425948  | -1.02516088 | 2.24443680  |
| H | 6.05340348  | -1.93204288 | 1.41155780  |
| C | 1.45353548  | -1.50503488 | 1.34207480  |
| H | 1.48078048  | -0.96505288 | 2.28816180  |
| C | 0.30304148  | -1.43287788 | 0.66470080  |
| C | 6.45193248  | -3.75655688 | -0.57796020 |
| H | 6.72044048  | -4.65591888 | -0.01348920 |
| H | 6.38942948  | -4.03748488 | -1.63235420 |
| H | 7.26943448  | -3.04052388 | -0.46187020 |
| C | -0.82448052 | -0.61673688 | 1.19903480  |
| H | 0.17505848  | -1.90277788 | -0.31178120 |
| O | -0.68779452 | 0.01571012  | 2.39998180  |
| H | -0.98424396 | -1.34812419 | 2.18719775  |

|   |             |             |             |
|---|-------------|-------------|-------------|
| C | 2.27300048  | 0.68501412  | -0.94496420 |
| C | 4.02214948  | 2.83905212  | -0.48965720 |
| C | 3.56373048  | 0.67481512  | -1.47474120 |
| C | 1.87702548  | 1.76758712  | -0.17232020 |
| C | 2.73900348  | 2.84785412  | 0.03869580  |
| C | 4.43391848  | 1.73791612  | -1.24208020 |
| C | 2.05596448  | 3.91914012  | 0.85988380  |
| C | 0.57925348  | 3.55457212  | 0.70775580  |
| C | 0.59689948  | 2.01586312  | 0.59972080  |
| N | -0.65993152 | 1.58636212  | -0.01602320 |
| C | -1.53380752 | 2.41563312  | -0.66068220 |
| C | -1.19228752 | 3.86451512  | -0.85081820 |
| O | 0.15912948  | 4.10065612  | -0.54190020 |
| N | -2.66280552 | 1.81577512  | -0.90731320 |
| N | -2.48937852 | 0.56499412  | -0.36973420 |
| C | -1.29710252 | 0.41719512  | 0.20331680  |
| C | -3.58041752 | -0.36537588 | -0.30686420 |
| C | -5.67961552 | -2.15233688 | -0.15120020 |
| C | -4.35575852 | -0.37190688 | 0.85675280  |
| C | -3.81167852 | -1.20661588 | -1.39265820 |
| C | -4.87761152 | -2.10003888 | -1.29153420 |
| C | -5.40500552 | -1.28588588 | 0.91015280  |
| C | -2.93390152 | -1.14209488 | -2.61377620 |
| C | -6.84074652 | -3.10917888 | -0.06930120 |
| H | 1.60218248  | -0.14621088 | -1.12861320 |
| H | 4.69206748  | 3.67861412  | -0.32802020 |
| H | 3.89092148  | -0.17748888 | -2.06198020 |
| H | 5.43641848  | 1.71408112  | -1.65743820 |

|   |             |             |             |
|---|-------------|-------------|-------------|
| H | 2.34839548  | 3.86410912  | 1.91451480  |
| H | 2.24339548  | 4.93420112  | 0.50180480  |
| H | -0.06731552 | 3.91537212  | 1.51818280  |
| H | 0.59019048  | 1.51109712  | 1.58314380  |
| H | -1.85896752 | 4.45744012  | -0.20772720 |
| H | -1.35221352 | 4.16696912  | -1.88741420 |
| H | -5.08248452 | -2.77160388 | -2.12137220 |
| H | -6.02448452 | -1.32140788 | 1.80291380  |
| H | -3.27330552 | -1.84990688 | -3.37130420 |
| H | -2.94218452 | -0.13760388 | -3.04727420 |
| H | -1.89482752 | -1.37983188 | -2.36331220 |
| H | -6.74556452 | -3.91132188 | -0.80394720 |
| H | -7.78397252 | -2.58820888 | -0.26256220 |
| H | -6.91150452 | -3.55763788 | 0.92466580  |
| C | -4.05608045 | 0.60336107  | 2.01028887  |
| H | -3.26056190 | 0.21286704  | 2.60992597  |
| H | -3.76755072 | 1.55241406  | 1.60910435  |
| H | -4.93191097 | 0.72242307  | 2.61331883  |

*Re*-TS2D -1759.41

Zero-point correction= 0.555486 (Hartree/Particle)

|   |             |             |             |
|---|-------------|-------------|-------------|
| C | -3.61663600 | -0.85126900 | 1.79468600  |
| C | -6.15575900 | -1.74921300 | 0.97118700  |
| C | -4.63139400 | -1.06544000 | 2.72725600  |
| C | -3.89298000 | -1.07821100 | 0.45523400  |
| C | -5.15020900 | -1.52022100 | 0.04159500  |
| C | -5.88711500 | -1.51603500 | 2.32023700  |
| C | -5.18283200 | -1.67191400 | -1.46298200 |
| C | -4.00832100 | -0.79501600 | -1.90307400 |



|   |             |             |             |
|---|-------------|-------------|-------------|
| C | -2.98993700 | -0.96168300 | -0.75357200 |
| N | -2.06401600 | 0.18699700  | -0.74134500 |
| C | -2.33066500 | 1.36144100  | -1.39706800 |
| C | -3.53654300 | 1.48760300  | -2.27815700 |
| O | -4.50740400 | 0.53836400  | -1.92290200 |
| N | -1.37689800 | 2.22683100  | -1.24589500 |
| N | -0.45766000 | 1.57101500  | -0.46722100 |
| C | -0.84311300 | 0.31861800  | -0.15850200 |
| C | 0.73221700  | 2.25231100  | -0.05066500 |
| C | 3.04769200  | 3.52578500  | 0.76925600  |
| C | 1.79525900  | 2.34336900  | -0.95284900 |
| C | 0.78103400  | 2.77122300  | 1.24339400  |
| C | 1.95825100  | 3.40929400  | 1.63274700  |
| C | 2.94878700  | 2.99114100  | -0.51832500 |
| C | 1.70535900  | 1.69398700  | -2.30649100 |
| C | -0.38970700 | 2.61601600  | 2.17597700  |
| H | -2.63598600 | -0.51156200 | 2.10817100  |
| H | -7.13686700 | -2.08987800 | 0.65369100  |
| H | -4.44005100 | -0.88517800 | 3.78009900  |
| H | -6.66426600 | -1.67975100 | 3.06003600  |
| H | -5.01151800 | -2.71220800 | -1.76216900 |
| H | -6.11198000 | -1.32815700 | -1.92367300 |
| H | -3.58916900 | -1.05522700 | -2.88453000 |
| H | -2.37432200 | -1.85590200 | -0.85096000 |
| H | -3.21789500 | 1.35638000  | -3.32357500 |
| H | -3.97725200 | 2.47992900  | -2.17181000 |
| H | 2.02540300  | 3.82267400  | 2.63588100  |
| H | 3.79370500  | 3.07272400  | -1.19785600 |

|   |             |             |             |
|---|-------------|-------------|-------------|
| H | 2.59026800  | 1.91978000  | -2.90341300 |
| H | 0.81844800  | 2.03006800  | -2.85048800 |
| H | 1.63472900  | 0.60485300  | -2.19446600 |
| H | -0.21180300 | 3.14546900  | 3.11289700  |
| H | -1.30738800 | 3.00489400  | 1.72407800  |
| H | -0.55485300 | 1.55659200  | 2.40235100  |
| C | -0.16115100 | -0.70878700 | 0.64069800  |
| H | -0.07181192 | -0.95703877 | 1.85397776  |
| C | 1.31295100  | -0.77793200 | 0.44233300  |
| H | 1.88420300  | 0.14595200  | 0.42940200  |
| C | 1.92104900  | -1.96471500 | 0.32373900  |
| H | 1.28794500  | -2.84650900 | 0.39414600  |
| C | 3.36215600  | -2.17106600 | 0.12061000  |
| C | 3.89136300  | -3.46358500 | 0.20949500  |
| C | 4.25173800  | -1.12663900 | -0.18087000 |
| C | 5.24923500  | -3.70493000 | 0.02286700  |
| H | 3.22221300  | -4.29094200 | 0.43095900  |
| C | 5.60474900  | -1.37084300 | -0.36426700 |
| H | 3.87762300  | -0.11092600 | -0.28615500 |
| C | 6.13189800  | -2.66387100 | -0.26279900 |
| H | 5.62968200  | -4.72046600 | 0.09948600  |
| H | 6.27084100  | -0.54403300 | -0.60058700 |
| O | -0.86190800 | -1.91407600 | 0.74630500  |
| C | 4.32230800  | 4.18687000  | 1.22503800  |
| H | 4.12842100  | 4.92670600  | 2.00457500  |
| H | 5.01324400  | 3.44409600  | 1.63644900  |
| H | 4.82785200  | 4.68424300  | 0.39426100  |
| C | 7.63968390  | -2.91658740 | -0.44804506 |

|         |            |             |             |
|---------|------------|-------------|-------------|
| H       | 7.96930036 | -2.45745903 | -1.35659012 |
| H       | 8.17563200 | -2.49791934 | 0.37801589  |
| H       | 7.82173637 | -3.96997245 | -0.49427081 |
| Si-TS2B |            |             | -218.76     |

Zero-point correction= 0.730760 (Hartree/Particle)

|   |             |             |             |
|---|-------------|-------------|-------------|
| C | 4.12876200  | 2.35174400  | 0.69662400  |
| C | 2.79233700  | 1.97261900  | 0.64357000  |
| C | 2.29969300  | 0.96040100  | 1.47934500  |
| C | 3.18923100  | 0.37487700  | 2.39180900  |
| C | 4.52446300  | 0.75747300  | 2.44003800  |
| C | 5.02093500  | 1.74881700  | 1.58835200  |
| H | 4.48895800  | 3.13455800  | 0.03341100  |
| H | 2.11934800  | 2.47158900  | -0.04953800 |
| H | 2.82760100  | -0.40868900 | 3.05272500  |
| H | 5.19592200  | 0.27637700  | 3.14716100  |
| C | 0.92351800  | 0.45446200  | 1.38842800  |
| H | 0.55085000  | -0.13704600 | 2.22280300  |
| C | 0.14325300  | 0.56227100  | 0.30550700  |
| C | -1.13308900 | -0.19127400 | 0.18488500  |
| H | 0.50821100  | 1.07756100  | -0.57960100 |
| O | -1.43459400 | -1.04078600 | 1.17564800  |
| H | -0.71670000 | -1.20341000 | -0.67155500 |
| C | -4.12302100 | 0.98421000  | -1.51439800 |
| N | -3.41534900 | 2.06109900  | -1.59341500 |
| N | -3.48698200 | -0.01898500 | -0.81489200 |
| N | -2.26113800 | 1.74129200  | -0.93016100 |
| C | -2.25659800 | 0.46829600  | -0.46582100 |
| C | -1.33373500 | 2.80048300  | -0.64641100 |

|   |             |             |             |
|---|-------------|-------------|-------------|
| C | -0.56692900 | 3.30806300  | -1.69667200 |
| C | -1.23830900 | 3.26771700  | 0.66725700  |
| C | 0.35418300  | 4.30909700  | -1.39198400 |
| C | -0.29387300 | 4.26011500  | 0.92202200  |
| C | 0.51568300  | 4.78216900  | -0.08810600 |
| C | -5.52495500 | 0.76585500  | -1.97033100 |
| C | -4.24363600 | -1.30675200 | -0.72809000 |
| C | -5.71851300 | -0.94527200 | -0.34616400 |
| O | -6.23989900 | 0.26354300  | -0.86288400 |
| C | -5.70460700 | -0.92419600 | 1.18814300  |
| H | -5.32171100 | 0.04604100  | 1.52819100  |
| H | -6.69957200 | -1.06711200 | 1.61488000  |
| C | -4.74602600 | -2.04814100 | 1.48070100  |
| C | -4.66360300 | -2.87296200 | 2.59428500  |
| C | -3.92016900 | -2.27681800 | 0.37784900  |
| C | -3.76362700 | -3.93863000 | 2.57195500  |
| H | -5.30278800 | -2.70661300 | 3.45603000  |
| C | -3.06527800 | -3.36783200 | 0.32264400  |
| C | -2.98586600 | -4.19414900 | 1.44201400  |
| H | -3.68844200 | -4.59391800 | 3.43413600  |
| H | -2.45772600 | -3.55890100 | -0.55796600 |
| H | -2.31304500 | -5.04538000 | 1.43062600  |
| H | -5.55997600 | 0.07544600  | -2.82476300 |
| H | -5.96951800 | 1.71679400  | -2.26236900 |
| H | -0.18256600 | 4.62836100  | 1.93870400  |
| H | 0.97240700  | 4.71419200  | -2.18911800 |
| C | -2.09158500 | 2.69399600  | 1.76602300  |
| H | -3.13724000 | 2.61250100  | 1.45254100  |

|   |             |             |             |
|---|-------------|-------------|-------------|
| H | -1.74561500 | 1.69188900  | 2.04554000  |
| H | -2.04712700 | 3.32882800  | 2.65218500  |
| C | -0.71045800 | 2.76024400  | -3.09098500 |
| H | -0.57011400 | 1.67390000  | -3.09935300 |
| H | -1.70839500 | 2.96102200  | -3.49034600 |
| H | 0.02911900  | 3.20647600  | -3.75718000 |
| C | 1.58088700  | 5.79529300  | 0.23842200  |
| H | 1.23494900  | 6.50608500  | 0.99256100  |
| H | 2.46489600  | 5.29003300  | 0.64334600  |
| H | 1.88794100  | 6.35221900  | -0.64921800 |
| C | 5.67252500  | -1.59919900 | -0.36988300 |
| C | 4.29360600  | -1.72188100 | -0.45827900 |
| C | 3.71309900  | -2.79438100 | -1.15331500 |
| C | 4.56566200  | -3.71469700 | -1.77430600 |
| C | 5.94737600  | -3.58765900 | -1.68020300 |
| C | 6.52473300  | -2.52859000 | -0.97658300 |
| H | 6.09379700  | -0.75886700 | 0.17739200  |
| H | 3.66352000  | -0.96508600 | 0.00128800  |
| H | 4.13562700  | -4.54746000 | -2.32464200 |
| H | 6.58925900  | -4.32127100 | -2.16109800 |
| C | 2.25686500  | -2.96660500 | -1.24472300 |
| H | 1.88012400  | -3.61539700 | -2.03582300 |
| C | 1.35721700  | -2.39312200 | -0.43445700 |
| H | 1.67470100  | -1.75989800 | 0.38772600  |
| C | -0.12360300 | -2.53759300 | -0.65208200 |
| H | -0.92940700 | -2.05610600 | 0.60242100  |
| O | -0.53529300 | -3.37972200 | -1.45130300 |
| H | -6.32886100 | -1.78690800 | -0.69943900 |

|   |             |             |             |
|---|-------------|-------------|-------------|
| H | -4.16342500 | -1.76462400 | -1.71794600 |
| C | 6.47332800  | 2.14960900  | 1.63775700  |
| H | 6.67125900  | 3.00079500  | 0.98272400  |
| H | 6.77287300  | 2.42459400  | 2.65324900  |
| H | 7.12240200  | 1.32612100  | 1.32112100  |
| C | 8.02096200  | -2.36615700 | -0.90405400 |
| H | 8.38302600  | -1.71859700 | -1.70974700 |
| H | 8.32337800  | -1.91139900 | 0.04272900  |
| H | 8.52959700  | -3.32823200 | -1.00091300 |

*Re-TS2B* -421.97

Zero-point correction= 0.730323 (Hartree/Particle)

|   |             |             |             |
|---|-------------|-------------|-------------|
| C | 4.57315100  | 2.69869500  | -0.11646700 |
| C | 3.26243300  | 2.24593900  | -0.13798300 |
| C | 2.40571100  | 2.56112900  | -1.21377100 |
| C | 2.91930800  | 3.36259100  | -2.23813700 |
| C | 4.23593500  | 3.81421800  | -2.21193200 |
| C | 5.08771900  | 3.48317300  | -1.15952100 |
| H | 5.21504500  | 2.43586100  | 0.72161900  |
| H | 2.90238300  | 1.63208800  | 0.68490200  |
| H | 2.27473500  | 3.62257900  | -3.07040900 |
| H | 4.60702000  | 4.42318200  | -3.02439200 |
| C | 1.00915100  | 2.10292400  | -1.29261400 |
| H | 0.41438500  | 2.49880500  | -2.11269500 |
| C | 0.43217600  | 1.24088000  | -0.44779900 |
| C | -0.95733400 | 0.72304700  | -0.62989800 |
| H | 1.01522900  | 0.78496200  | 0.35557200  |
| O | -1.61248400 | 1.25015200  | -1.74646000 |
| H | -0.84277700 | -0.41054400 | -1.01325500 |

|   |             |             |             |
|---|-------------|-------------|-------------|
| C | -3.56219900 | 0.63292900  | 1.89980200  |
| N | -2.56036900 | 0.24590400  | 2.63857800  |
| N | -3.16156200 | 0.94182600  | 0.62406600  |
| N | -1.49645700 | 0.28578300  | 1.78952100  |
| C | -1.83056200 | 0.70495200  | 0.55593200  |
| C | -0.22144200 | -0.25022800 | 2.17202600  |
| C | 0.06138000  | -1.56866000 | 1.80627100  |
| C | 0.71556600  | 0.58684500  | 2.78371400  |
| C | 1.36199200  | -2.03102700 | 2.02657200  |
| C | 1.98526300  | 0.08078800  | 2.99726700  |
| C | 2.33584000  | -1.21425300 | 2.60159900  |
| C | -4.98797900 | 0.85192200  | 2.24282800  |
| C | -4.15248200 | 1.24902800  | -0.41991700 |
| C | -5.40377000 | 1.98097900  | 0.19412400  |
| O | -5.38830200 | 2.05365700  | 1.61158900  |
| C | -6.63891600 | 1.21840000  | -0.34781200 |
| H | -7.16049800 | 1.82504100  | -1.09478100 |
| H | -7.34846700 | 1.03669000  | 0.46618400  |
| C | -6.09423400 | -0.04762400 | -0.95987800 |
| C | -6.78928800 | -1.14892800 | -1.44390000 |
| C | -4.70327200 | -0.02864400 | -1.00974900 |
| C | -6.06946800 | -2.21711900 | -1.97719300 |
| H | -7.87442900 | -1.17757100 | -1.41026900 |
| C | -3.97547600 | -1.08995900 | -1.53770800 |
| C | -4.67294500 | -2.18964200 | -2.02897100 |
| H | -6.60151800 | -3.08153600 | -2.36180800 |
| H | -2.88978300 | -1.08855700 | -1.58292700 |
| H | -4.10734900 | -3.01643000 | -2.44479600 |

|   |             |             |             |
|---|-------------|-------------|-------------|
| H | -5.60606900 | -0.00131500 | 1.90953500  |
| H | -5.10501400 | 0.97564300  | 3.31918200  |
| H | 2.74480100  | 0.72123500  | 3.45651900  |
| H | 1.61792100  | -3.03921200 | 1.71842200  |
| C | 0.36237600  | 2.02610000  | 3.08248300  |
| H | -0.59364900 | 2.09736100  | 3.61749600  |
| H | 0.27578000  | 2.59207000  | 2.15257200  |
| H | 1.13538800  | 2.48027800  | 3.69668500  |
| C | -0.98948900 | -2.45585600 | 1.19143700  |
| H | -1.16849400 | -2.22023400 | 0.13635900  |
| H | -1.94164100 | -2.35990100 | 1.72161900  |
| H | -0.68412200 | -3.49966700 | 1.23929300  |
| C | 3.72522700  | -1.73766700 | 2.82023300  |
| H | 4.47062700  | -0.95733500 | 2.64660800  |
| H | 3.94233800  | -2.56901400 | 2.13326500  |
| H | 3.85527800  | -2.09831400 | 3.84605500  |
| C | 4.83538600  | -1.12898500 | -0.46987100 |
| C | 3.51212900  | -1.19602800 | -0.88311400 |
| C | 2.86925600  | -2.43121600 | -1.02727100 |
| C | 3.58612600  | -3.58807800 | -0.69541200 |
| C | 4.91551700  | -3.51617300 | -0.28779400 |
| C | 5.55858700  | -2.27697000 | -0.16238500 |
| H | 5.31178700  | -0.15505100 | -0.37537200 |
| H | 2.96621400  | -0.27935700 | -1.10198000 |
| H | 3.10910200  | -4.55626500 | -0.79237200 |
| H | 5.46491900  | -4.43024700 | -0.06161300 |
| C | 1.47532500  | -2.52721100 | -1.48313800 |
| H | 0.89963600  | -3.39495300 | -1.15463800 |



|   |             |             |             |
|---|-------------|-------------|-------------|
| C | 0.84706500  | -1.61725100 | -2.24906000 |
| H | 1.37874700  | -0.73215600 | -2.60891000 |
| C | -0.65585500 | -1.56045400 | -2.26987800 |
| H | -1.51736200 | 0.50096400  | -2.39530600 |
| O | -1.32051800 | -2.57737200 | -2.45545800 |
| C | 6.51984000  | 3.94969200  | -1.12760400 |
| H | 6.76439400  | 4.40841900  | -0.16525600 |
| H | 6.71472700  | 4.68219400  | -1.91368700 |
| H | 7.20796600  | 3.11073600  | -1.27300700 |
| C | 6.97822900  | -2.20148700 | 0.36513200  |
| H | 7.37675200  | -1.03986900 | 0.28377100  |
| H | 7.67447000  | -2.95891400 | -0.30018700 |
| H | 6.97278500  | -2.57248300 | 1.55094100  |
| H | -3.65116900 | 1.86640200  | -1.16195600 |
| H | -5.40677400 | 3.02370100  | -0.12335500 |

Si-M02BA

Zero-point correction= 0.590026 (Hartree/Particle)

|   |            |            |             |
|---|------------|------------|-------------|
| C | 4.56438200 | 3.05558400 | 2.47775500  |
| C | 3.33533600 | 2.51164600 | 2.12405600  |
| C | 2.96482900 | 2.39176900 | 0.77891000  |
| C | 3.85613000 | 2.86428900 | -0.19150200 |
| C | 5.08725100 | 3.40084100 | 0.16583100  |
| C | 5.46450900 | 3.50420500 | 1.50662100  |
| H | 4.83186900 | 3.13802700 | 3.52861000  |
| H | 2.64915200 | 2.17896700 | 2.89807900  |
| H | 3.58989400 | 2.77277000 | -1.24181800 |
| H | 5.77199300 | 3.74019400 | -0.60771200 |
| C | 1.73983400 | 1.70052600 | 0.34963900  |

|   |             |             |             |
|---|-------------|-------------|-------------|
| H | 1.33571700  | 1.93228800  | -0.63573400 |
| C | 1.14108000  | 0.71137500  | 1.01421000  |
| C | 6.78645000  | 4.11401200  | 1.89594900  |
| H | 6.69643600  | 5.19789500  | 2.02649400  |
| H | 7.15227000  | 3.70026900  | 2.83917300  |
| H | 7.54435100  | 3.93843000  | 1.12812000  |
| C | -0.02991400 | -0.04981000 | 0.42739600  |
| H | 1.49061300  | 0.39861900  | 1.99987100  |
| O | -0.45638300 | 0.36836700  | -0.79308900 |
| H | -0.83240600 | -0.07965000 | 1.19059800  |
| C | 4.06876400  | -0.61693400 | 0.54787400  |
| C | 5.95849900  | -0.51328600 | -1.53185600 |
| C | 5.39805200  | -0.29027600 | 0.81401900  |
| C | 3.69329200  | -0.86781300 | -0.76362700 |
| C | 4.63641000  | -0.84589300 | -1.79414700 |
| C | 6.33098900  | -0.22184000 | -0.21904900 |
| C | 3.99571600  | -1.23968100 | -3.10691900 |
| C | 2.70784400  | -1.92435400 | -2.64819900 |
| C | 2.33147900  | -1.14841300 | -1.36784300 |
| N | 1.38553500  | -1.95289300 | -0.59452100 |
| C | 1.15284300  | -3.28143400 | -0.83514800 |
| C | 1.97344400  | -4.03226400 | -1.84290500 |
| O | 3.05800900  | -3.25606800 | -2.29077500 |
| N | 0.09359900  | -3.69810100 | -0.20714000 |
| N | -0.36459400 | -2.58139300 | 0.43955200  |
| C | 0.38362200  | -1.50815900 | 0.19753500  |
| C | -1.67148700 | -2.53870500 | 1.04006300  |
| C | -4.16265000 | -2.12766600 | 2.13996300  |

|   |             |             |             |
|---|-------------|-------------|-------------|
| C | -2.75066400 | -2.33826400 | 0.17431000  |
| C | -1.78950400 | -2.56926700 | 2.42618100  |
| C | -3.06135100 | -2.36988500 | 2.95825200  |
| C | -3.99941900 | -2.15714500 | 0.75423400  |
| C | -2.53630300 | -2.25637600 | -1.31286900 |
| C | -0.57768500 | -2.73717200 | 3.30290900  |
| C | -5.48794800 | -1.71476500 | 2.71322800  |
| H | 3.34357300  | -0.66044700 | 1.35263200  |
| H | 6.69268800  | -0.49273700 | -2.33211300 |
| H | 5.70003700  | -0.06808300 | 1.83237400  |
| H | 7.35953400  | 0.04533200  | 0.00266900  |
| H | 3.75461700  | -0.36265100 | -3.71846700 |
| H | 4.60588600  | -1.91991400 | -3.70579200 |
| H | 1.90095500  | -1.92617000 | -3.39331800 |
| H | 1.78914700  | -0.22451600 | -1.60490400 |
| H | 1.31274700  | -4.31154800 | -2.67657300 |
| H | 2.38122000  | -4.94562200 | -1.40546500 |
| H | -3.18245900 | -2.34898900 | 4.03838100  |
| H | -4.84938200 | -1.93281500 | 0.11592700  |
| H | -3.47988800 | -2.03953500 | -1.81573800 |
| H | -2.13205800 | -3.19434100 | -1.70774000 |
| H | -1.83567500 | -1.44232300 | -1.53455100 |
| H | -0.87437300 | -2.93071400 | 4.33522800  |
| H | 0.05486700  | -3.56235100 | 2.96290000  |
| H | 0.03291500  | -1.82688000 | 3.29729400  |
| H | -5.54117100 | -1.89531500 | 3.78925500  |
| H | -6.31663900 | -2.23836200 | 2.22741200  |
| H | -5.59830300 | -0.64221900 | 2.51368700  |

|    |             |            |             |
|----|-------------|------------|-------------|
| C  | -3.52429300 | 0.75472900 | 0.77340200  |
| O  | -4.77703500 | 0.89412500 | 0.81983800  |
| O  | -2.71656700 | 0.67299500 | 1.71485900  |
| H  | -2.01585300 | 0.61255000 | -0.54435500 |
| O  | -3.02423500 | 0.71680900 | -0.52351600 |
| Cs | -5.01239200 | 2.68889600 | -1.48814200 |

Re-M02BA

Zero-point correction= 0.589299 (Hartree/Particle)

|   |             |             |             |
|---|-------------|-------------|-------------|
| C | 5.08481100  | -1.49937100 | -2.15684300 |
| C | 3.81257200  | -1.19716900 | -1.68796500 |
| C | 3.62023300  | -0.70449400 | -0.38739600 |
| C | 4.74983400  | -0.54505200 | 0.42603600  |
| C | 6.02757900  | -0.84538100 | -0.04158400 |
| C | 6.20200500  | -1.31915000 | -1.33891200 |
| H | 5.20884600  | -1.87832600 | -3.16673600 |
| H | 2.95482200  | -1.35214700 | -2.33572200 |
| H | 4.61657300  | -0.17901100 | 1.44091300  |
| H | 6.88590300  | -0.70993000 | 0.60934100  |
| C | 2.29584500  | -0.36304200 | 0.15666500  |
| H | 2.25772600  | -0.00409800 | 1.18500700  |
| C | 1.11866400  | -0.47226200 | -0.46082600 |
| C | -0.17291300 | -0.07716900 | 0.23788200  |
| H | 1.03719500  | -0.82266600 | -1.49110500 |
| O | -0.06390000 | 0.37680700  | 1.50805400  |
| H | -0.68716200 | 0.64764200  | -0.43428600 |
| C | -0.88859200 | 3.33393500  | 0.22700300  |
| O | -0.69851700 | 4.50010700  | -0.19307400 |
| O | -1.86641100 | 2.58234100  | -0.00639000 |

|    |             |             |             |
|----|-------------|-------------|-------------|
| H  | -0.04876200 | 1.85715600  | 1.28318900  |
| O  | 0.12472200  | 2.83627000  | 1.01655600  |
| Cs | 2.18847900  | 4.76189700  | 0.17996800  |
| C  | -2.97058800 | -2.36365900 | 0.77914100  |
| N  | -2.04670900 | -3.27865900 | 0.73003500  |
| N  | -2.45586800 | -1.12243600 | 0.54384500  |
| N  | -0.91107900 | -2.56961400 | 0.43571100  |
| C  | -1.13894500 | -1.25752800 | 0.32631800  |
| C  | 0.37522500  | -3.20382700 | 0.36521500  |
| C  | 0.80090600  | -3.70217100 | -0.86498700 |
| C  | 1.18042300  | -3.16722900 | 1.50470200  |
| C  | 2.11732400  | -4.15231000 | -0.95005100 |
| C  | 2.48582100  | -3.63152900 | 1.36947000  |
| C  | 2.97613100  | -4.09904400 | 0.14828200  |
| C  | -4.40996200 | -2.41820500 | 1.17273400  |
| C  | -3.29040200 | 0.07705900  | 0.53508100  |
| C  | -4.42639100 | -0.05387700 | 1.60894700  |
| O  | -4.60042700 | -1.37763300 | 2.11086700  |
| H  | -4.17654300 | 0.53405200  | 2.49185700  |
| H  | -2.64041900 | 0.95096000  | 0.70487400  |
| C  | -5.70240800 | 0.46653100  | 0.90832500  |
| H  | -5.90343700 | 1.49823000  | 1.21506900  |
| H  | -6.56515200 | -0.13842700 | 1.20319500  |
| C  | -5.39165800 | 0.40826600  | -0.56621500 |
| C  | -6.25103200 | 0.55008200  | -1.65206700 |
| C  | -4.03088900 | 0.20434100  | -0.77581700 |
| C  | -5.72507500 | 0.48240600  | -2.94067800 |
| H  | -7.31451600 | 0.70809800  | -1.49877000 |

|   |             |             |             |
|---|-------------|-------------|-------------|
| C | -3.49715400 | 0.14570000  | -2.05736700 |
| C | -4.35728800 | 0.28342000  | -3.14374300 |
| H | -6.38410800 | 0.58801100  | -3.79651300 |
| H | -2.43013300 | -0.00032100 | -2.20600800 |
| H | -3.96373800 | 0.24182200  | -4.15403700 |
| H | -5.05852500 | -2.30364600 | 0.29304600  |
| H | -4.63564200 | -3.36343600 | 1.66611700  |
| H | 3.14979100  | -3.59095100 | 2.22975600  |
| H | 2.48817400  | -4.52460700 | -1.90188600 |
| C | 0.67221500  | -2.55716600 | 2.78118600  |
| H | -0.26969000 | -3.02138600 | 3.09034500  |
| H | 0.48551300  | -1.48442900 | 2.62794300  |
| H | 1.40082900  | -2.68615300 | 3.58354500  |
| C | -0.12113500 | -3.70393700 | -2.05486400 |
| H | -0.40977800 | -2.68336200 | -2.33225600 |
| H | -1.04308200 | -4.25058700 | -1.83721500 |
| H | 0.36170500  | -4.16598500 | -2.91734400 |
| C | 4.42786600  | -4.46950900 | 0.01116000  |
| H | 4.60887600  | -5.05247400 | -0.89451400 |
| H | 4.77443800  | -5.04683700 | 0.87226300  |
| H | 5.03296100  | -3.55736500 | -0.04780200 |
| C | 7.61081844  | -1.65289372 | -1.86375466 |
| H | 8.09213335  | -0.75452228 | -2.18958391 |
| H | 8.18589030  | -2.10194298 | -1.08110076 |
| H | 7.53328214  | -2.33410272 | -2.68524260 |

Si-TS2BA -1282.66

Zero-point correction= 0.584946 (Hartree/Particle)

|   |            |            |            |
|---|------------|------------|------------|
| C | 4.80771753 | 3.20156701 | 2.25842846 |
|---|------------|------------|------------|

|   |             |             |             |
|---|-------------|-------------|-------------|
| C | 3.62303487  | 2.57905990  | 1.88377174  |
| C | 3.27669447  | 2.43473818  | 0.53190734  |
| C | 4.15524298  | 2.97165607  | -0.41922819 |
| C | 5.33935761  | 3.59314455  | -0.04075544 |
| C | 5.69057191  | 3.71792516  | 1.30512908  |
| H | 5.05114466  | 3.29769269  | 3.31428295  |
| H | 2.94904631  | 2.20568757  | 2.64968167  |
| H | 3.91408863  | 2.86750374  | -1.47424908 |
| H | 6.00906336  | 3.98393548  | -0.80340294 |
| C | 2.09877330  | 1.68086680  | 0.08554909  |
| H | 1.74381552  | 1.84102597  | -0.93150893 |
| C | 1.49920714  | 0.70929215  | 0.78741554  |
| C | 6.96368260  | 4.42538929  | 1.71312448  |
| H | 6.79580668  | 5.49148439  | 1.86819055  |
| H | 7.32630122  | 4.00287339  | 2.66002816  |
| H | 7.74211568  | 4.30987439  | 0.96212155  |
| C | 0.37229930  | -0.09976488 | 0.26775375  |
| H | 1.83721289  | 0.47691749  | 1.80102408  |
| O | 0.01480038  | 0.11617341  | -1.05076577 |
| H | -1.05318641 | 0.27132883  | 1.10030641  |
| C | 4.42270379  | -0.64053477 | 0.34321162  |
| C | 6.21689817  | -0.99566710 | -1.79257209 |
| C | 5.76523569  | -0.28684438 | 0.47854579  |
| C | 3.98596145  | -1.15287343 | -0.86993062 |
| C | 4.88116172  | -1.34875971 | -1.92541008 |
| C | 6.65244443  | -0.45219333 | -0.58327599 |
| C | 4.17615664  | -1.96945338 | -3.11094815 |
| C | 2.90507106  | -2.53111857 | -2.47377720 |

|   |             |             |             |
|---|-------------|-------------|-------------|
| C | 2.59510507  | -1.52625342 | -1.34507607 |
| N | 1.68361211  | -2.16826560 | -0.39721857 |
| C | 1.44086313  | -3.51311257 | -0.36565476 |
| C | 2.20947196  | -4.44880808 | -1.25243510 |
| O | 3.26735677  | -3.78048537 | -1.89385325 |
| N | 0.40940943  | -3.79202411 | 0.37667988  |
| N | -0.02045776 | -2.56504085 | 0.80845631  |
| C | 0.71045781  | -1.55933660 | 0.32659657  |
| C | -1.30062871 | -2.39754107 | 1.43741112  |
| C | -3.74430886 | -1.75091450 | 2.53390659  |
| C | -2.40784552 | -2.32533113 | 0.58702325  |
| C | -1.36981683 | -2.19148995 | 2.81010833  |
| C | -2.61813033 | -1.87672317 | 3.34350318  |
| C | -3.63084914 | -2.01633723 | 1.16755854  |
| C | -2.24106043 | -2.50161341 | -0.89857141 |
| C | -0.12671011 | -2.21996141 | 3.65720386  |
| C | -5.04171757 | -1.22956019 | 3.08520981  |
| H | 3.73463768  | -0.50044943 | 1.16839296  |
| H | 6.91368007  | -1.14795430 | -2.61180983 |
| H | 6.11302584  | 0.13748127  | 1.41508855  |
| H | 7.69281598  | -0.16602538 | -0.46487265 |
| H | 3.91649025  | -1.21609772 | -3.86356181 |
| H | 4.74917697  | -2.76148476 | -3.59885941 |
| H | 2.06356230  | -2.66022418 | -3.16771750 |
| H | 2.03877324  | -0.65234507 | -1.71251909 |
| H | 1.50616893  | -4.87554125 | -1.98261623 |
| H | 2.64188835  | -5.26653698 | -0.67237470 |
| H | -2.69941643 | -1.67390482 | 4.40847489  |



|    |             |             |             |
|----|-------------|-------------|-------------|
| H  | -4.50594380 | -1.91214120 | 0.53060559  |
| H  | -3.20300679 | -2.39164186 | -1.40312300 |
| H  | -1.83341692 | -3.48967349 | -1.13570876 |
| H  | -1.55600285 | -1.73669633 | -1.28548798 |
| H  | -0.38214411 | -2.24181278 | 4.71806198  |
| H  | 0.49614243  | -3.08930377 | 3.42865549  |
| H  | 0.47441415  | -1.32202459 | 3.47403722  |
| H  | -5.09013379 | -1.32523649 | 4.17231469  |
| H  | -5.90166380 | -1.74610536 | 2.64950114  |
| H  | -5.10795702 | -0.16906017 | 2.81860073  |
| C  | -3.00748038 | 0.90873870  | 0.69847514  |
| O  | -4.18351933 | 1.22422889  | 0.97178256  |
| O  | -2.05911441 | 0.74298920  | 1.52660087  |
| H  | -1.42279537 | 0.48001592  | -0.85684005 |
| O  | -3.01416535 | 0.79273278  | -0.57222034 |
| Cs | -5.07875328 | 2.17185717  | -1.69066526 |

*Re-TS2BA* -1236.31

Zero-point correction= 0.584512 (Hartree/Particle)

|   |             |             |            |
|---|-------------|-------------|------------|
| C | -1.24406011 | -3.27053607 | 2.35542181 |
| C | -0.50395217 | -4.22047827 | 4.90257326 |
| C | -2.20934720 | -3.74616213 | 3.24427618 |
| C | 0.08063438  | -3.27316519 | 2.76045930 |
| C | 0.45701603  | -3.75681206 | 4.01422226 |
| C | -1.84402704 | -4.20740946 | 4.50870187 |
| C | 1.96143610  | -3.70289961 | 4.16405209 |
| C | 2.43553598  | -3.59779656 | 2.71119419 |
| C | 1.31132147  | -2.79049845 | 2.02290385 |
| N | 1.32899950  | -3.02250131 | 0.57929727 |

|   |             |             |             |
|---|-------------|-------------|-------------|
| C | 2.02064399  | -4.06371995 | 0.00886976  |
| C | 2.87409951  | -4.96268857 | 0.85256044  |
| O | 2.46682067  | -4.92085457 | 2.19756877  |
| N | 1.92646878  | -4.07857838 | -1.27663437 |
| N | 1.13660940  | -2.98413280 | -1.57231180 |
| C | 0.74223040  | -2.30107965 | -0.44883052 |
| C | 0.80409165  | -2.70108419 | -2.92954471 |
| C | 0.08100161  | -2.03127088 | -5.52278136 |
| C | 1.58318112  | -1.77167971 | -3.62682520 |
| C | -0.30884879 | -3.32779794 | -3.49573890 |
| C | -0.65146541 | -2.97450258 | -4.80175291 |
| C | 1.20138847  | -1.44654300 | -4.92568205 |
| C | 2.74881025  | -1.10563014 | -2.94887145 |
| C | -1.11649744 | -4.32280496 | -2.70721139 |
| C | -0.34343673 | -1.62502481 | -6.91057027 |
| H | -1.53265942 | -2.92907165 | 1.36921971  |
| H | -0.21877458 | -4.60583604 | 5.87741881  |
| H | -3.25004510 | -3.75876267 | 2.93486866  |
| H | -2.60570583 | -4.57835143 | 5.18777124  |
| H | 2.27798262  | -2.81762485 | 4.72783279  |
| H | 2.38927081  | -4.58652988 | 4.64390169  |
| H | 3.42211069  | -3.12721691 | 2.59459274  |
| H | 1.45439437  | -1.72105238 | 2.18931489  |
| H | 3.92445450  | -4.64734398 | 0.75485190  |
| H | 2.78799338  | -5.99315809 | 0.50466624  |
| H | -1.51755295 | -3.44417746 | -5.26182327 |
| H | 1.78461120  | -0.71610427 | -5.48152988 |
| H | 3.31885174  | -0.50300359 | -3.65807858 |

|   |             |             |             |
|---|-------------|-------------|-------------|
| H | 3.41614434  | -1.84564745 | -2.49809807 |
| H | 2.39435252  | -0.44764757 | -2.14634232 |
| H | -1.79329877 | -4.87054148 | -3.36583710 |
| H | -0.46339718 | -5.03943093 | -2.20204995 |
| H | -1.72317552 | -3.82147793 | -1.94457232 |
| H | -1.01261305 | -0.75879243 | -6.86915563 |
| H | -0.88032817 | -2.43251185 | -7.41333928 |
| H | 0.51783320  | -1.34751005 | -7.52276920 |
| C | 0.35424378  | -0.64127852 | -0.60752588 |
| H | 0.24639115  | 0.00051456  | 0.60262096  |
| C | -1.06821507 | -0.90028996 | -0.81154191 |
| H | -1.48220307 | -1.70373596 | -0.21279591 |
| C | -1.90779307 | -0.05319696 | -1.44317391 |
| H | -1.47920907 | 0.74951904  | -2.03769191 |
| C | -3.36802607 | -0.13782196 | -1.41449891 |
| C | -4.12232007 | 0.71753904  | -2.23079891 |
| C | -4.08194907 | -1.04615196 | -0.60933091 |
| C | -5.51307307 | 0.66859904  | -2.25277491 |
| H | -3.59998307 | 1.42625704  | -2.86944991 |
| C | -5.46721407 | -1.09168596 | -0.63730891 |
| H | -3.54649007 | -1.72353096 | 0.05152009  |
| C | -6.21417707 | -0.23750796 | -1.45882591 |
| H | -6.06404707 | 1.34435104  | -2.90302691 |
| H | -5.98959507 | -1.80577396 | -0.00383891 |
| C | -7.71948607 | -0.30644696 | -1.47531391 |
| H | -8.14115107 | 0.43445604  | -2.15870991 |
| H | -8.06770507 | -1.29386396 | -1.79509691 |
| H | -8.13712207 | -0.12360096 | -0.48006591 |

|    |             |            |             |
|----|-------------|------------|-------------|
| O  | 0.90645293  | 0.28155804 | -1.57842291 |
| C  | 0.03133000  | 2.06690400 | 1.40148200  |
| O  | 0.15249200  | 2.32162500 | 0.15536500  |
| O  | -0.18340500 | 2.91048700 | 2.29110400  |
| H  | 0.65878207  | 1.32428096 | -0.90198809 |
| O  | 0.14736300  | 0.77322900 | 1.79638500  |
| Cs | -1.12551300 | 4.98787900 | 0.40893600  |

Si-M03BA

Zero-point correction= 0.589971 (Hartree/Particle)

|   |            |             |             |
|---|------------|-------------|-------------|
| C | 5.64435700 | 0.81199600  | 2.48373300  |
| C | 4.42022400 | 0.63313700  | 1.86740700  |
| C | 3.28837800 | 0.21585200  | 2.58877500  |
| C | 3.46078700 | 0.00052600  | 3.95846300  |
| C | 4.68554900 | 0.18884800  | 4.57188700  |
| C | 5.80367100 | 0.59980500  | 3.84836800  |
| H | 6.49451500 | 1.15156800  | 1.89552600  |
| H | 4.32414000 | 0.86732700  | 0.81350700  |
| H | 2.60616700 | -0.31265400 | 4.55161900  |
| H | 4.77692700 | 0.02338500  | 5.64154300  |
| C | 1.96500800 | 0.08176700  | 1.99212100  |
| H | 1.11158500 | 0.12337200  | 2.66357800  |
| C | 1.73109900 | -0.00893900 | 0.66528600  |
| C | 7.13590800 | 0.80796800  | 4.51043500  |
| H | 7.74432700 | -0.10223300 | 4.47992100  |
| H | 7.70238600 | 1.59878600  | 4.01147100  |
| H | 7.01561500 | 1.08767800  | 5.55932300  |
| C | 0.46110500 | 0.15208500  | 0.03149300  |
| H | 2.57199100 | -0.12073400 | -0.01420000 |

|   |             |             |             |
|---|-------------|-------------|-------------|
| O | -0.60846400 | 0.55246000  | 0.79331600  |
| C | 0.14596300  | 3.47299500  | 0.33440000  |
| C | -1.62751800 | 5.62026000  | -0.09110000 |
| C | 0.32551500  | 4.68875500  | 0.98984900  |
| C | -0.93048100 | 3.34750500  | -0.53685300 |
| C | -1.80245300 | 4.41368800  | -0.75347300 |
| C | -0.55463600 | 5.75028300  | 0.78564200  |
| C | -2.87646300 | 4.03510500  | -1.74629100 |
| C | -2.28919000 | 2.79922600  | -2.42854600 |
| C | -1.41289800 | 2.15157700  | -1.33016600 |
| N | -0.40137300 | 1.31639500  | -1.94674000 |
| C | -0.06296800 | 1.36198500  | -3.26888400 |
| C | -0.86059900 | 2.21990000  | -4.20146000 |
| O | -1.47650300 | 3.26828300  | -3.49209000 |
| N | 0.90383800  | 0.57109800  | -3.56601800 |
| N | 1.25607100  | -0.02905700 | -2.34411800 |
| C | 0.45893900  | 0.43938000  | -1.32119800 |
| C | 1.69116300  | -1.39800800 | -2.44708700 |
| C | 2.44906800  | -4.04108000 | -2.88051200 |
| C | 0.69988200  | -2.37314700 | -2.63405100 |
| C | 3.04965600  | -1.71354200 | -2.46914800 |
| C | 3.40400500  | -3.04787300 | -2.68954300 |
| C | 1.10304400  | -3.68432800 | -2.83820800 |
| C | -0.75628300 | -1.99542100 | -2.69769200 |
| C | 4.11467000  | -0.66961800 | -2.27758500 |
| C | 2.83721900  | -5.46575900 | -3.17503600 |
| H | 0.82468400  | 2.64455400  | 0.51484800  |
| H | -2.31010800 | 6.44795200  | -0.25857500 |

|    |             |             |             |
|----|-------------|-------------|-------------|
| H  | 1.15708800  | 4.80633700  | 1.67568200  |
| H  | -0.40020500 | 6.68487600  | 1.31420700  |
| H  | -3.81607700 | 3.78051900  | -1.24452300 |
| H  | -3.08363000 | 4.81478100  | -2.48339500 |
| H  | -3.04132000 | 2.09995400  | -2.81796100 |
| H  | -2.02401300 | 1.50370400  | -0.69382400 |
| H  | -1.61430900 | 1.59358300  | -4.70212100 |
| H  | -0.21352300 | 2.66112700  | -4.95963900 |
| H  | 4.45799800  | -3.30934300 | -2.73288900 |
| H  | 0.34417300  | -4.44883400 | -2.98373700 |
| H  | -1.37058200 | -2.88578000 | -2.83496000 |
| H  | -0.92556800 | -1.31940600 | -3.54208200 |
| H  | -1.09506400 | -1.49945100 | -1.78271500 |
| H  | 5.02316000  | -0.95117300 | -2.81423700 |
| H  | 3.78718100  | 0.31091900  | -2.62579500 |
| H  | 4.37761900  | -0.58524400 | -1.21764700 |
| H  | 3.91612500  | -5.60865500 | -3.10171200 |
| H  | 2.52816900  | -5.74700800 | -4.18674900 |
| H  | 2.34730900  | -6.15448200 | -2.48343100 |
| C  | -2.07048200 | -2.50344200 | 0.67982500  |
| O  | -2.81400100 | -3.42547500 | 1.00356800  |
| O  | -0.79933700 | -2.81775700 | 0.30805100  |
| O  | -2.36594600 | -1.27227100 | 0.68008300  |
| Cs | -4.74831800 | -1.66911700 | 2.48856100  |
| H  | -1.30595100 | -0.17171500 | 0.74837800  |
| H  | -0.33651300 | -1.98214700 | 0.26931500  |

Re-M03BA

Zero-point correction= 0.590514 (Hartree/Particle)

|    |             |             |             |
|----|-------------|-------------|-------------|
| C  | -5.02915100 | -1.05119000 | 1.86906100  |
| C  | -3.72479400 | -0.82369900 | 1.45583000  |
| C  | -3.44594800 | -0.36135700 | 0.15927400  |
| C  | -4.53203000 | -0.14798600 | -0.69705700 |
| C  | -5.84208400 | -0.37491400 | -0.27888200 |
| C  | -6.11474200 | -0.83063400 | 1.01063600  |
| H  | -5.21632300 | -1.41206900 | 2.87770900  |
| H  | -2.90773300 | -1.01919200 | 2.14427300  |
| H  | -4.34230400 | 0.19893000  | -1.70986300 |
| H  | -6.66431200 | -0.19944700 | -0.96807900 |
| C  | -2.08174100 | -0.11670600 | -0.33521100 |
| H  | -1.97713300 | 0.20406900  | -1.37180100 |
| C  | -0.93938800 | -0.28158700 | 0.33371100  |
| C  | 0.40121100  | -0.00170300 | -0.32685100 |
| H  | -0.92148800 | -0.60139900 | 1.37696600  |
| O  | 0.37233000  | 0.39572000  | -1.61986700 |
| C  | 1.26507500  | 3.34170800  | -0.37581500 |
| O  | 1.05891500  | 4.49078100  | 0.08178500  |
| O  | 2.23149100  | 2.57838600  | -0.13406300 |
| O  | 0.28014800  | 2.87696000  | -1.22021200 |
| Cs | -1.85831100 | 4.60241500  | -0.17142100 |
| C  | 3.06660800  | -2.47347900 | -0.66491500 |
| N  | 2.08552700  | -3.32767700 | -0.62916500 |
| N  | 2.62168600  | -1.19617600 | -0.48702600 |
| N  | 0.98535100  | -2.54074000 | -0.40501100 |
| C  | 1.29106700  | -1.24256800 | -0.32508200 |
| C  | -0.34041600 | -3.09139000 | -0.36741700 |
| C  | -0.84523700 | -3.51713800 | 0.85996500  |

|   |             |             |             |
|---|-------------|-------------|-------------|
| C | -1.09571100 | -3.04874500 | -1.54071000 |
| C | -2.19029800 | -3.88115300 | 0.90545000  |
| C | -2.43250900 | -3.42477600 | -1.44378300 |
| C | -3.00002400 | -3.81407300 | -0.22848100 |
| C | 4.51422400  | -2.62614900 | -0.99851600 |
| C | 3.52916500  | -0.05151900 | -0.48121500 |
| C | 4.68323500  | -0.28124200 | -1.51762400 |
| O | 4.80257600  | -1.63180500 | -1.96183800 |
| H | 4.48711200  | 0.28284200  | -2.42926200 |
| H | 2.94228700  | 0.85728500  | -0.69508000 |
| C | 5.96406100  | 0.20126900  | -0.80026000 |
| H | 6.21460700  | 1.21645600  | -1.12535200 |
| H | 6.80671800  | -0.44621200 | -1.06034600 |
| C | 5.61634300  | 0.19124400  | 0.66723800  |
| C | 6.45592900  | 0.31002700  | 1.77089300  |
| C | 4.24193700  | 0.06228700  | 0.84682700  |
| C | 5.89704300  | 0.29487400  | 3.04748600  |
| H | 7.52953000  | 0.40934400  | 1.64074500  |
| C | 3.67624700  | 0.05540900  | 2.11595400  |
| C | 4.51663000  | 0.17009400  | 3.22060800  |
| H | 6.54042700  | 0.38279000  | 3.91709400  |
| H | 2.60005200  | -0.03521800 | 2.24134400  |
| H | 4.09782800  | 0.16719900  | 4.22157300  |
| H | 5.13442500  | -2.51981800 | -0.09781700 |
| H | 4.70116500  | -3.59925900 | -1.45234400 |
| H | -3.05803100 | -3.37458300 | -2.33196000 |
| H | -2.62122700 | -4.19388900 | 1.85340100  |
| C | -0.49861100 | -2.52476300 | -2.81694500 |



|   |             |             |             |
|---|-------------|-------------|-------------|
| H | 0.42237000  | -3.06057100 | -3.06791800 |
| H | -0.24823500 | -1.46082800 | -2.69753000 |
| H | -1.20179100 | -2.64032000 | -3.64366500 |
| C | 0.02625000  | -3.53158000 | 2.08732300  |
| H | 0.35040100  | -2.51862800 | 2.35354000  |
| H | 0.92982100  | -4.12490700 | 1.92132600  |
| H | -0.51274400 | -3.94946000 | 2.93900200  |
| C | -4.47712300 | -4.08863600 | -0.14202500 |
| H | -4.74121200 | -4.56509000 | 0.80466700  |
| H | -4.81091000 | -4.73192700 | -0.96064700 |
| H | -5.02832600 | -3.14349500 | -0.21082700 |
| C | -7.52275200 | -1.12043600 | 1.46162200  |
| H | -7.69891200 | -0.75154600 | 2.47572200  |
| H | -8.25546100 | -0.65767700 | 0.79675000  |
| H | -7.71493500 | -2.19878900 | 1.46942600  |
| H | 2.07069500  | 1.67611816  | 0.15169459  |
| H | 0.30031921  | 1.31031564  | -1.33714968 |

Si-TS2BA1 -1283.50

Zero-point correction= 0.583962 (Hartree/Particle)

|   |             |             |             |
|---|-------------|-------------|-------------|
| C | -4.10929900 | -3.44357900 | 1.11305400  |
| C | -2.88349800 | -2.92232700 | 0.71199600  |
| C | -2.72919300 | -2.30740000 | -0.54009600 |
| C | -3.85671900 | -2.27089000 | -1.37746300 |
| C | -5.07676700 | -2.79602100 | -0.97482400 |
| C | -5.23070700 | -3.38839900 | 0.28264900  |
| H | -4.19411200 | -3.91785100 | 2.08830600  |
| H | -2.02640600 | -3.01233500 | 1.37317400  |
| H | -3.76604800 | -1.80462400 | -2.35499500 |

|   |             |             |             |
|---|-------------|-------------|-------------|
| H | -5.93062300 | -2.74541200 | -1.64718700 |
| C | -1.48901900 | -1.65847700 | -0.97013700 |
| H | -1.38404600 | -1.41140300 | -2.02420400 |
| C | -0.51747600 | -1.23858700 | -0.14066000 |
| C | -6.56086900 | -3.95204800 | 0.71411100  |
| H | -6.48728400 | -4.43087700 | 1.69356300  |
| H | -7.32282900 | -3.16828200 | 0.78060700  |
| H | -6.92636800 | -4.69851300 | 0.00188000  |
| C | 0.68838200  | -0.51572400 | -0.56234900 |
| H | -0.59802300 | -1.43080600 | 0.93241800  |
| O | 0.71555300  | -0.10846600 | -1.89105500 |
| H | 1.88749600  | -1.46256500 | -0.43340300 |
| C | -2.91607100 | 0.70870000  | 0.84675700  |
| C | -4.75641500 | 2.55381300  | -0.20823100 |
| C | -4.27244600 | 0.61701200  | 1.16114600  |
| C | -2.49485700 | 1.71488500  | -0.01053800 |
| C | -3.40778700 | 2.64135400  | -0.52392900 |
| C | -5.18613600 | 1.52733500  | 0.63398200  |
| C | -2.70332300 | 3.65333400  | -1.40006700 |
| C | -1.24716600 | 3.49934900  | -0.96375600 |
| C | -1.13124900 | 1.99942700  | -0.61637600 |
| N | 0.05844600  | 1.81593700  | 0.21669400  |
| C | 0.70680200  | 2.83243500  | 0.85738800  |
| C | 0.18022500  | 4.23556600  | 0.79242900  |
| O | -1.11080500 | 4.26183400  | 0.23326200  |
| N | 1.84818600  | 2.43475000  | 1.34058700  |
| N | 1.92713500  | 1.12272400  | 0.96158400  |
| C | 0.86926800  | 0.72578600  | 0.25473800  |

|   |             |             |             |
|---|-------------|-------------|-------------|
| C | 3.16942900  | 0.39914600  | 1.03511500  |
| C | 5.39763900  | -1.20418100 | 0.87240800  |
| C | 4.08335400  | 0.64314700  | 0.00501800  |
| C | 3.34409600  | -0.57581100 | 2.00927900  |
| C | 4.49226200  | -1.36067100 | 1.91880600  |
| C | 5.20734600  | -0.16833300 | -0.04426300 |
| C | 3.79721900  | 1.67758000  | -1.04962500 |
| C | 2.28121700  | -0.83879400 | 3.04187300  |
| C | 6.48549900  | -2.20619300 | 0.61431600  |
| H | -2.21434000 | -0.00775500 | 1.25480500  |
| H | -5.46420900 | 3.27533600  | -0.60620400 |
| H | -4.61372100 | -0.18475300 | 1.80851500  |
| H | -6.23889300 | 1.44047700  | 0.88396600  |
| H | -2.80480400 | 3.40224700  | -2.46193900 |
| H | -3.04753400 | 4.67978800  | -1.25266200 |
| H | -0.50726000 | 3.81873500  | -1.70899500 |
| H | -0.95303800 | 1.38196900  | -1.50724200 |
| H | 0.88434800  | 4.83322100  | 0.19521000  |
| H | 0.11504100  | 4.67337200  | 1.79024400  |
| H | 4.63541200  | -2.16607800 | 2.63535400  |
| H | 5.87907100  | -0.08299300 | -0.89267400 |
| H | 4.59055400  | 1.67418100  | -1.79774900 |
| H | 3.71295300  | 2.67980800  | -0.61581400 |
| H | 2.86669600  | 1.42154000  | -1.56717100 |
| H | 2.67540200  | -1.45345800 | 3.85350200  |
| H | 1.88754000  | 0.08901500  | 3.46709800  |
| H | 1.44345900  | -1.38162700 | 2.58869900  |
| H | 6.59416300  | -2.91494600 | 1.43886800  |

|   |            |             |             |
|---|------------|-------------|-------------|
| H | 7.45022400 | -1.72195500 | 0.43469100  |
| H | 6.19286800 | -2.73746500 | -0.30002100 |
| C | 3.59904700 | -1.82622100 | -1.84397400 |
| O | 4.74153500 | -2.21677100 | -2.17297600 |
| O | 2.98689800 | -2.34898100 | -0.80585100 |
| H | 1.75713100 | -0.50761400 | -2.23917600 |
| O | 3.00107700 | -0.87180600 | -2.52290200 |

*Re-TS2BA1* -1022.55

Zero-point correction= 0.583718 (Hartree/Particle)

|   |             |             |             |
|---|-------------|-------------|-------------|
| C | -3.40766600 | -1.34942200 | 0.91080200  |
| C | -6.05815600 | -1.78127100 | 0.05170800  |
| C | -4.29908000 | -2.08175100 | 1.69629000  |
| C | -3.85876500 | -0.85301000 | -0.30038700 |
| C | -5.17170000 | -1.05217200 | -0.72898900 |
| C | -5.60827900 | -2.30029600 | 1.26848000  |
| C | -5.39293400 | -0.37451200 | -2.06405900 |
| C | -4.23583300 | 0.62755700  | -2.12055100 |
| C | -3.09756100 | -0.09330400 | -1.36480500 |
| N | -2.11269500 | 0.88054700  | -0.88445000 |
| C | -2.38486500 | 2.22224000  | -0.80692200 |
| C | -3.67989100 | 2.77147600  | -1.32549900 |
| O | -4.66337300 | 1.77039100  | -1.38800600 |
| N | -1.37811000 | 2.90901200  | -0.38022100 |
| N | -0.39149800 | 1.96434100  | -0.17653100 |
| C | -0.80527800 | 0.69711600  | -0.48165000 |
| C | 0.85738300  | 2.38117200  | 0.37572800  |
| C | 3.30933700  | 3.12366400  | 1.43816300  |
| C | 1.89324000  | 2.72054900  | -0.49866400 |

|   |             |             |             |
|---|-------------|-------------|-------------|
| C | 0.99887900  | 2.41595300  | 1.76687800  |
| C | 2.24237100  | 2.79192000  | 2.27431000  |
| C | 3.11791200  | 3.08954300  | 0.05553000  |
| C | 1.69823600  | 2.60741200  | -1.98588700 |
| C | -0.14126000 | 2.03216100  | 2.67007100  |
| C | 4.63867400  | 3.52332100  | 2.02580900  |
| H | -2.39560300 | -1.16729000 | 1.25265300  |
| H | -7.08401600 | -1.93755800 | -0.27068300 |
| H | -3.95161500 | -2.48786900 | 2.64090100  |
| H | -6.28847100 | -2.87405100 | 1.89076700  |
| H | -5.31325200 | -1.08688600 | -2.89355700 |
| H | -6.35205600 | 0.14314000  | -2.14716500 |
| H | -3.94617700 | 0.92535400  | -3.13842200 |
| H | -2.56763900 | -0.79348900 | -2.01154200 |
| H | -3.50149100 | 3.20489000  | -2.32210200 |
| H | -4.04208800 | 3.56111200  | -0.66540000 |
| H | 2.38229700  | 2.81487500  | 3.35251300  |
| H | 3.94249700  | 3.34300600  | -0.60676500 |
| H | 2.54862600  | 3.03208500  | -2.52249600 |
| H | 0.78659200  | 3.12079500  | -2.30384000 |
| H | 1.60202000  | 1.55306700  | -2.27293500 |
| H | -1.07576900 | 2.48786700  | 2.33070800  |
| H | -0.28142100 | 0.94405600  | 2.68790000  |
| H | 0.05705400  | 2.36433800  | 3.69111500  |
| H | 4.57578200  | 4.50852400  | 2.49883700  |
| H | 5.41403500  | 3.56746200  | 1.25791300  |
| H | 4.95557500  | 2.81138600  | 2.79243400  |
| C | -0.13526700 | -0.55162100 | -0.36521100 |

|   |             |             |             |
|---|-------------|-------------|-------------|
| H | -0.25390300 | -0.77087100 | 1.05832600  |
| C | 1.33278200  | -0.59245900 | -0.43569200 |
| H | 1.88399600  | 0.24766600  | -0.02565300 |
| C | 2.00064400  | -1.66770800 | -0.88923800 |
| H | 1.41409700  | -2.51549100 | -1.23276300 |
| C | 3.45929000  | -1.79388200 | -0.94527100 |
| C | 4.03354400  | -3.02021600 | -1.30923500 |
| C | 4.34016100  | -0.73137700 | -0.67274400 |
| C | 5.41270900  | -3.18491900 | -1.38451100 |
| H | 3.37824000  | -3.85834400 | -1.53108400 |
| C | 5.71488100  | -0.90150500 | -0.74705100 |
| H | 3.94337200  | 0.24554100  | -0.40698300 |
| C | 6.28172200  | -2.13140100 | -1.10031500 |
| H | 5.82211200  | -4.15212900 | -1.66726100 |
| H | 6.36869200  | -0.05912300 | -0.52997800 |
| C | 7.77771000  | -2.31154800 | -1.14543600 |
| H | 8.05387700  | -3.17364300 | -1.75794200 |
| H | 8.27258100  | -1.42805900 | -1.55913700 |
| H | 8.18786500  | -2.47485400 | -0.14266800 |
| O | -0.81952300 | -1.62992400 | -0.86852200 |
| C | -0.65690100 | -2.51619900 | 2.33666600  |
| O | -0.75947500 | -3.17364500 | 1.21361300  |
| O | -0.77327900 | -3.05144100 | 3.44121000  |
| H | -0.81787100 | -2.44151000 | 0.12103000  |
| O | -0.43410600 | -1.19342600 | 2.26817800  |

Si-M2

Zero-point correction= 0.559851 (Hartree/Particle)

|   |            |            |            |
|---|------------|------------|------------|
| C | 4.49160400 | 3.22106000 | 2.28351900 |
|---|------------|------------|------------|

|   |             |             |             |
|---|-------------|-------------|-------------|
| C | 3.29245200  | 2.63511200  | 1.89492400  |
| C | 2.93630200  | 2.54563100  | 0.54100300  |
| C | 3.81943600  | 3.09948500  | -0.39643200 |
| C | 5.01665400  | 3.68504800  | -0.00382500 |
| C | 5.37826000  | 3.75454300  | 1.34371500  |
| H | 4.74205300  | 3.27607600  | 3.34059000  |
| H | 2.61417200  | 2.25219700  | 2.65228300  |
| H | 3.56967900  | 3.03893700  | -1.45283400 |
| H | 5.68864100  | 4.09125300  | -0.75629700 |
| C | 1.74253700  | 1.83094500  | 0.07389900  |
| H | 1.38248700  | 2.05009500  | -0.92938100 |
| C | 1.14076600  | 0.83819900  | 0.74690500  |
| C | 6.66181600  | 4.41880900  | 1.77149600  |
| H | 7.03004900  | 4.00274700  | 2.71290700  |
| H | 7.44183300  | 4.29566300  | 1.01549000  |
| H | 6.51894800  | 5.49445400  | 1.92249800  |
| C | -0.01297500 | 0.05376100  | 0.26333300  |
| H | 1.50309300  | 0.56503100  | 1.74093100  |
| O | -0.36715800 | 0.32536700  | -1.07719400 |
| C | 4.05017900  | -0.53178000 | 0.33458700  |
| C | 5.86540100  | -0.94271000 | -1.77277300 |
| C | 5.39398900  | -0.18653900 | 0.47887100  |
| C | 3.62258700  | -1.06103200 | -0.87419800 |
| C | 4.52808100  | -1.28521100 | -1.91544300 |
| C | 6.29163100  | -0.37962400 | -0.56916200 |
| C | 3.83290500  | -1.92161400 | -3.09843100 |
| C | 2.54935300  | -2.45936900 | -2.46653300 |
| C | 2.23278700  | -1.42392400 | -1.36580600 |

|   |             |             |             |
|---|-------------|-------------|-------------|
| N | 1.29110300  | -2.03204100 | -0.42303800 |
| C | 1.06513400  | -3.37645300 | -0.33702700 |
| C | 1.83375100  | -4.33912200 | -1.19405900 |
| O | 2.89747000  | -3.69349200 | -1.84865600 |
| N | 0.03924000  | -3.63444400 | 0.42286500  |
| N | -0.40371500 | -2.40090700 | 0.80508100  |
| C | 0.31700600  | -1.40775900 | 0.28702100  |
| C | -1.67081100 | -2.22046300 | 1.46099800  |
| C | -4.07485000 | -1.50629900 | 2.59166000  |
| C | -2.79486300 | -2.15727300 | 0.63290500  |
| C | -1.70562200 | -1.98867800 | 2.83046400  |
| C | -2.93731800 | -1.64475200 | 3.38290800  |
| C | -3.99800400 | -1.81192400 | 1.23154400  |
| C | -2.66592400 | -2.37466600 | -0.85021200 |
| C | -0.44440000 | -2.01352500 | 3.65064100  |
| C | -5.33852600 | -0.91063700 | 3.14229300  |
| H | 3.35734600  | -0.37353000 | 1.15181400  |
| H | 6.57011700  | -1.11731200 | -2.58060400 |
| H | 5.73282700  | 0.25339800  | 1.41149900  |
| H | 7.33300500  | -0.10025100 | -0.44416000 |
| H | 3.59071200  | -1.18141000 | -3.86960800 |
| H | 4.40466400  | -2.72884500 | -3.56210900 |
| H | 1.71599700  | -2.60071800 | -3.16771100 |
| H | 1.71389200  | -0.54622600 | -1.77081400 |
| H | 1.13149300  | -4.78228100 | -1.91521000 |
| H | 2.25892800  | -5.14210700 | -0.58887000 |
| H | -2.99144300 | -1.41396100 | 4.44389200  |
| H | -4.88199200 | -1.69545300 | 0.61001500  |



|   |             |             |             |
|---|-------------|-------------|-------------|
| H | -3.64655600 | -2.32161500 | -1.32673700 |
| H | -2.22033700 | -3.34961300 | -1.07292100 |
| H | -2.03900100 | -1.58662200 | -1.28132900 |
| H | -0.67734300 | -2.01735200 | 4.71680700  |
| H | 0.16872100  | -2.89049200 | 3.42414800  |
| H | 0.15759200  | -1.12163000 | 3.44236100  |
| H | -5.35219700 | -0.91711700 | 4.23448600  |
| H | -6.22714500 | -1.43272500 | 2.77568900  |
| H | -5.37247700 | 0.12469100  | 2.78364600  |
| H | -1.39636400 | 0.55724300  | -0.98738800 |

*Re-M2*

Zero-point correction= 0.559542 (Hartree/Particle)

|   |            |             |             |
|---|------------|-------------|-------------|
| C | 2.71713500 | 1.98784800  | 0.98807500  |
| C | 5.44824200 | 2.66467400  | 1.07918000  |
| C | 3.18278600 | 2.94589800  | 1.89052800  |
| C | 3.63115100 | 1.37896600  | 0.13711600  |
| C | 4.98809400 | 1.70437900  | 0.18813600  |
| C | 4.53393300 | 3.28699500  | 1.92980900  |
| C | 5.76665500 | 0.87340300  | -0.80688600 |
| C | 4.81297400 | -0.28833400 | -1.09925300 |
| C | 3.40910200 | 0.34626700  | -0.95119200 |
| N | 2.41299900 | -0.67697500 | -0.66459700 |
| C | 2.74463000 | -1.92108100 | -0.17882700 |
| C | 4.17098400 | -2.37028100 | -0.22536000 |
| O | 5.02966000 | -1.25958200 | -0.08758400 |
| N | 1.72231900 | -2.59572000 | 0.21701900  |
| N | 0.64439600 | -1.75374000 | -0.01303800 |
| C | 1.03494300 | -0.53330200 | -0.53224300 |

|   |             |             |             |
|---|-------------|-------------|-------------|
| C | -0.68267600 | -2.22638200 | 0.18514500  |
| C | -3.32753400 | -2.98799200 | 0.58163500  |
| C | -1.47516600 | -2.52315700 | -0.93131000 |
| C | -1.16839700 | -2.32559700 | 1.49190400  |
| C | -2.49696000 | -2.71353800 | 1.66835600  |
| C | -2.79851200 | -2.89418700 | -0.70824200 |
| C | -0.91933300 | -2.39760000 | -2.32276500 |
| C | -0.27971100 | -1.97937000 | 2.65572700  |
| C | -4.77235700 | -3.36759500 | 0.78122500  |
| H | 1.66874100  | 1.70135300  | 0.98041100  |
| H | 6.50379800  | 2.91658900  | 1.12512000  |
| H | 2.48636400  | 3.42421500  | 2.57164700  |
| H | 4.88044900  | 4.03279900  | 2.63808700  |
| H | 5.96785200  | 1.43739300  | -1.72488600 |
| H | 6.71735100  | 0.49919200  | -0.41979400 |
| H | 4.95490700  | -0.74392100 | -2.08898100 |
| H | 3.12945900  | 0.84126400  | -1.88469200 |
| H | 4.36074500  | -2.88656900 | -1.17900700 |
| H | 4.37166200  | -3.06065900 | 0.59437600  |
| H | -2.89565500 | -2.78618100 | 2.67732700  |
| H | -3.43472600 | -3.11425800 | -1.56264900 |
| H | -1.56568900 | -2.90192300 | -3.04333200 |
| H | 0.08280300  | -2.83176600 | -2.38387300 |
| H | -0.83921300 | -1.34268100 | -2.60808800 |
| H | 0.57286500  | -2.66216300 | 2.71281700  |
| H | 0.12797800  | -0.96924500 | 2.54056200  |
| H | -0.83285900 | -2.02696300 | 3.59527800  |
| H | -4.98565600 | -4.34482200 | 0.33807000  |

|   |             |             |             |
|---|-------------|-------------|-------------|
| H | -5.43334800 | -2.64001900 | 0.29990500  |
| H | -5.02898300 | -3.41114000 | 1.84163300  |
| C | 0.27308500  | 0.55950100  | -0.87617400 |
| C | -1.10742100 | 0.74017700  | -0.54219200 |
| H | -1.53615300 | 0.01432700  | 0.14071200  |
| C | -1.88233100 | 1.76489300  | -0.96590100 |
| H | -1.45898000 | 2.50656000  | -1.64027800 |
| C | -3.28671800 | 1.95173900  | -0.59730100 |
| C | -3.93868500 | 3.14908700  | -0.92279500 |
| C | -4.04382400 | 0.96915000  | 0.06831500  |
| C | -5.27230300 | 3.36474300  | -0.59000900 |
| H | -3.38406200 | 3.92621500  | -1.44297700 |
| C | -5.37103300 | 1.19192400  | 0.40079500  |
| H | -3.59405200 | 0.01014800  | 0.31485700  |
| C | -6.01504100 | 2.39335200  | 0.07988700  |
| H | -5.74466700 | 4.30761400  | -0.85516800 |
| H | -5.92815100 | 0.41275200  | 0.91699800  |
| C | -7.46450900 | 2.60929600  | 0.43088000  |
| H | -7.76435700 | 3.64422900  | 0.24998100  |
| H | -8.11670300 | 1.96388600  | -0.16690300 |
| H | -7.65699500 | 2.37949000  | 1.48309500  |
| O | 0.91679200  | 1.55835400  | -1.60577500 |
| H | 0.87845700  | 2.37588200  | -1.08666000 |

TS3D -1608.73

Zero-point correction= 0.555303 (Hartree/Particle)

|   |             |             |             |
|---|-------------|-------------|-------------|
| C | -3.14938100 | -1.31269800 | -1.66649000 |
| C | -5.73504800 | -2.23292600 | -1.02485100 |
| C | -4.01847700 | -1.74989000 | -2.66627200 |

|   |             |             |             |
|---|-------------|-------------|-------------|
| C | -3.59753100 | -1.32968100 | -0.35299700 |
| C | -4.87638600 | -1.78554600 | -0.02965600 |
| C | -5.29710000 | -2.20747800 | -2.34890900 |
| C | -5.10709600 | -1.69920200 | 1.46189600  |
| C | -4.05431300 | -0.67890800 | 1.89834800  |
| C | -2.87970500 | -0.93408900 | 0.92304700  |
| N | -2.04934100 | 0.27389900  | 0.82497500  |
| C | -2.46785200 | 1.51177200  | 1.23937400  |
| C | -3.76219200 | 1.66031800  | 1.97703700  |
| O | -4.62564900 | 0.60002800  | 1.65339200  |
| N | -1.59098500 | 2.43155100  | 0.98745300  |
| N | -0.55555600 | 1.75428400  | 0.39196500  |
| C | -0.79733800 | 0.42798800  | 0.30334000  |
| C | 0.58973100  | 2.47135800  | -0.07939400 |
| C | 2.81297900  | 3.84667300  | -0.98712700 |
| C | 1.54730200  | 2.87507200  | 0.85118200  |
| C | 0.69720000  | 2.73133100  | -1.44864800 |
| C | 1.82573600  | 3.42228700  | -1.88009400 |
| C | 2.65720300  | 3.56870000  | 0.37103200  |
| C | 1.38726000  | 2.53238800  | 2.30771900  |
| C | -0.35217200 | 2.24433400  | -2.41001300 |
| C | 4.02610300  | 4.58212700  | -1.49406600 |
| H | -2.14024600 | -0.99222000 | -1.90191400 |
| H | -6.73304900 | -2.58372900 | -0.77919300 |
| H | -3.69267400 | -1.74034200 | -3.70135100 |
| H | -5.95882500 | -2.54487200 | -3.14042200 |
| H | -4.92455400 | -2.66417600 | 1.94815800  |
| H | -6.10742300 | -1.35836400 | 1.73852200  |

|   |             |             |             |
|---|-------------|-------------|-------------|
| H | -3.55425200 | 1.68452300  | 3.05754300  |
| H | -4.24947300 | 2.59443100  | 1.69440100  |
| H | 1.93851900  | 3.63526900  | -2.94048800 |
| H | 3.42040100  | 3.89205700  | 1.07419900  |
| H | 2.24510300  | 2.88202500  | 2.88389300  |
| H | 0.48017900  | 2.98309100  | 2.72078400  |
| H | 1.30385100  | 1.44750400  | 2.43868400  |
| H | -1.35945700 | 2.47833500  | -2.05286700 |
| H | -0.28263200 | 1.15626900  | -2.52334600 |
| H | -0.21707300 | 2.69961000  | -3.39219100 |
| H | 3.73524600  | 5.45647000  | -2.08297200 |
| H | 4.65853700  | 4.91897500  | -0.67049900 |
| H | 4.62734000  | 3.93652100  | -2.14099100 |
| C | 0.03451200  | -0.61166100 | -0.20255300 |
| C | 1.40395600  | -0.54092200 | -0.37191600 |
| H | 2.00614700  | 0.32590100  | -0.11767900 |
| C | 1.93762100  | -1.85523500 | -0.66464000 |
| H | 1.67874000  | -2.23381100 | -1.66032100 |
| C | 3.30340100  | -2.19714100 | -0.23988800 |
| C | 4.08420100  | -3.11695900 | -0.95807600 |
| C | 3.87717300  | -1.64581700 | 0.91728000  |
| C | 5.36508100  | -3.46098900 | -0.54573000 |
| H | 3.67389000  | -3.56063300 | -1.86207500 |
| C | 5.16399900  | -1.98400800 | 1.32071400  |
| H | 3.29447900  | -0.94816800 | 1.51446300  |
| C | 5.93350300  | -2.90117500 | 0.60197200  |
| H | 5.94231500  | -4.17400000 | -1.13066000 |
| H | 5.57848600  | -1.53374200 | 2.22034200  |

|   |             |             |             |
|---|-------------|-------------|-------------|
| C | 7.31255800  | -3.29900400 | 1.06347000  |
| H | 7.27714400  | -4.18171300 | 1.71162700  |
| H | 7.78801000  | -2.49485700 | 1.63141900  |
| H | 7.95842500  | -3.54349000 | 0.21575700  |
| O | -0.48497100 | -1.83491700 | -0.32348100 |
| H | 0.66911000  | -2.35618700 | -0.23678200 |
| H | -4.33369029 | -0.52244652 | 0.87738368  |
| H | -3.41721819 | -0.09068738 | 0.54271388  |

TS3B -275.54

Zero-point correction= 0.729533 (Hartree/Particle)

|   |             |             |             |
|---|-------------|-------------|-------------|
| C | -1.51875700 | 0.37244600  | -0.28071200 |
| C | -1.86320600 | 1.23784000  | 0.72125000  |
| H | -2.33519300 | 0.84974000  | 1.61404400  |
| C | -1.42952700 | 2.62817600  | 0.69794400  |
| C | -1.74923100 | 3.49753700  | -0.49263000 |
| C | -1.09139600 | 4.72814200  | -0.60561400 |
| C | -2.67556700 | 3.15632100  | -1.47892400 |
| C | -1.36078700 | 5.58638700  | -1.66386800 |
| H | -0.35859500 | 5.00975200  | 0.14684700  |
| C | -2.94037700 | 4.01544800  | -2.54306500 |
| H | -3.19945300 | 2.20691000  | -1.40935400 |
| C | -2.29052300 | 5.24375300  | -2.65083900 |
| H | -0.83880300 | 6.53813400  | -1.73072500 |
| H | -3.66031100 | 3.72627200  | -3.29554700 |
| O | -0.78467100 | 0.79659000  | -1.37111000 |
| C | -2.05696400 | -3.10699300 | -0.99975500 |
| N | -2.74015300 | -3.04984700 | 0.09787900  |
| N | -1.47526700 | -1.90304800 | -1.30695800 |

|   |             |             |             |
|---|-------------|-------------|-------------|
| N | -2.60052300 | -1.75258500 | 0.51781800  |
| C | -1.83486300 | -1.02116100 | -0.32305900 |
| C | -3.20685900 | -1.35521900 | 1.75321500  |
| C | -4.52412300 | -0.89231400 | 1.72168400  |
| C | -2.44749300 | -1.43837300 | 2.92208000  |
| C | -5.10342700 | -0.49912700 | 2.92960800  |
| C | -3.07337800 | -1.03383800 | 4.10632900  |
| C | -4.38840400 | -0.56650100 | 4.12838200  |
| C | -1.94084600 | -4.27308600 | -1.94323800 |
| C | -0.56430600 | -1.74554700 | -2.45076700 |
| C | -0.72492800 | -2.93163800 | -3.43028700 |
| O | -0.78019100 | -4.15722300 | -2.71617700 |
| C | 0.60186700  | -2.93332100 | -4.19366600 |
| H | 0.81751700  | -3.93126800 | -4.58204500 |
| H | 0.56082100  | -2.23787100 | -5.03915100 |
| C | 1.58261800  | -2.45913500 | -3.14465800 |
| C | 2.96042900  | -2.61747900 | -3.08829200 |
| C | 0.91187200  | -1.79943300 | -2.11200500 |
| C | 3.65420900  | -2.13142200 | -1.98347100 |
| H | 3.48602800  | -3.13326000 | -3.88647800 |
| C | 1.59228200  | -1.30505500 | -0.99778200 |
| C | 2.97764200  | -1.49063700 | -0.94661400 |
| H | 4.73095400  | -2.25521000 | -1.92248300 |
| H | 1.07703000  | -0.80732300 | -0.17891800 |
| H | 3.52750000  | -1.11770900 | -0.08881100 |
| H | -2.84058600 | -4.31178700 | -2.57579500 |
| H | -1.88606700 | -5.19903100 | -1.37091800 |
| H | -2.50668300 | -1.07900600 | 5.03271900  |

|   |             |             |             |
|---|-------------|-------------|-------------|
| H | -6.12454500 | -0.12636400 | 2.93525500  |
| C | -1.01211900 | -1.88538600 | 2.87984900  |
| H | -0.89632500 | -2.78469700 | 2.26798100  |
| H | -0.37826100 | -1.09548100 | 2.45723800  |
| H | -0.66186600 | -2.10435200 | 3.88641800  |
| C | -5.26218800 | -0.78908400 | 0.41458200  |
| H | -4.76012900 | -0.07804900 | -0.25156200 |
| H | -5.29406700 | -1.75584500 | -0.09626100 |
| H | -6.28491900 | -0.44448700 | 0.57297300  |
| H | -1.68922700 | 3.13899400  | 1.62775500  |
| C | 1.16988500  | 1.54271700  | 0.98943700  |
| C | 2.64747200  | 1.36988300  | 0.73218200  |
| O | 0.66621000  | 0.80961500  | 1.85491900  |
| H | -0.22579400 | 2.49635100  | 0.68725400  |
| H | -0.09686000 | 1.39400500  | -1.02671300 |
| C | -5.03655800 | -0.16260500 | 5.42705800  |
| H | -5.75727700 | 0.64388400  | 5.27460900  |
| H | -5.57445900 | -1.00865200 | 5.86685100  |
| H | -4.29214700 | 0.17097800  | 6.15296000  |
| C | 3.48440600  | 0.98823700  | 1.71000100  |
| C | 4.94571700  | 0.85960200  | 1.63178400  |
| C | 5.64723200  | 0.90026700  | 0.41602000  |
| C | 5.69380100  | 0.66070200  | 2.80065400  |
| C | 7.02618800  | 0.76450000  | 0.37322400  |
| H | 5.09237500  | 1.03081300  | -0.51331600 |
| C | 7.07694400  | 0.52636400  | 2.76363900  |
| H | 5.17040100  | 0.62466200  | 3.75152200  |
| C | 7.76308800  | 0.56995500  | 1.55621200  |



|   |             |             |             |
|---|-------------|-------------|-------------|
| H | 7.54693400  | 0.79373400  | -0.58045100 |
| H | 7.62527300  | 0.37930600  | 3.68707600  |
| H | 3.03048500  | 0.74920500  | 2.67975100  |
| H | 3.01855700  | 1.67234100  | -0.24295100 |
| C | 9.26308300  | 0.40656400  | 1.47759700  |
| H | 9.72715300  | 1.28988100  | 0.73366500  |
| H | 9.71471200  | 0.51860700  | 2.61199500  |
| H | 9.51537300  | -0.70924000 | 1.01024200  |
| C | -2.55971400 | 6.16750500  | -3.81160700 |
| H | -3.45960500 | 5.87952900  | -4.35349800 |
| H | -2.67486400 | 7.20200200  | -3.47614800 |
| H | -1.72395700 | 6.15893900  | -4.53059100 |
| H | -1.61284800 | -2.82827200 | -4.06881300 |
| H | -0.81663400 | -0.80957900 | -2.95014300 |

M04BA

Zero-point correction= 0.589942 (Hartree/Particle)

|   |             |             |             |
|---|-------------|-------------|-------------|
| C | -5.70719200 | -2.66490100 | 0.13103100  |
| C | -4.51911100 | -1.96553400 | 0.29811600  |
| C | -3.47188900 | -2.49295400 | 1.07648300  |
| C | -3.66501700 | -3.75839400 | 1.65389200  |
| C | -4.85350500 | -4.45948300 | 1.48242800  |
| C | -5.88645500 | -3.91547500 | 0.72285500  |
| H | -6.49815600 | -2.23390500 | -0.47623500 |
| H | -4.39717200 | -1.00589500 | -0.19810900 |
| H | -2.86508700 | -4.18776800 | 2.25155000  |
| H | -4.97337300 | -5.43467000 | 1.94488900  |
| C | -2.20811600 | -1.78823700 | 1.29881100  |
| H | -1.40613800 | -2.35972600 | 1.76160800  |

|    |             |             |             |
|----|-------------|-------------|-------------|
| C  | -1.99438600 | -0.48124800 | 0.99751300  |
| C  | -0.75345800 | 0.20635000  | 1.19316100  |
| H  | -2.81453800 | 0.08970100  | 0.57724900  |
| O  | 0.29482600  | -0.47612400 | 1.78205800  |
| H  | -0.92409500 | -1.93633800 | -0.61624400 |
| C  | 0.86593900  | -2.52041800 | -0.92980700 |
| O  | 1.68811400  | -2.86935400 | -1.78594600 |
| O  | -0.34853900 | -2.08502400 | -1.38647300 |
| H  | 0.52472200  | -1.27088300 | 1.21332600  |
| O  | 1.04392300  | -2.48904200 | 0.33072500  |
| Cs | 4.03785000  | -2.49844200 | 0.05467300  |
| C  | 0.49056300  | 3.46254200  | 0.43181900  |
| N  | -0.70329300 | 3.65958900  | -0.00118300 |
| N  | 0.66180800  | 2.22938800  | 1.01442300  |
| N  | -1.37328900 | 2.47324100  | 0.28548400  |
| C  | -0.52823000 | 1.51900800  | 0.84410500  |
| C  | -2.60862400 | 2.21656200  | -0.37850800 |
| C  | -2.60070100 | 1.59462800  | -1.63160400 |
| C  | -3.79661700 | 2.54329000  | 0.28441600  |
| C  | -3.83160700 | 1.27977700  | -2.20917400 |
| C  | -5.00266700 | 2.21260500  | -0.32902600 |
| C  | -5.03742700 | 1.57512400  | -1.57203400 |
| C  | 1.67741200  | 4.36841400  | 0.39707900  |
| C  | 2.00625200  | 1.73374600  | 1.26344600  |
| C  | 2.95146100  | 2.88637200  | 1.75563800  |
| O  | 2.40517000  | 4.18436800  | 1.59582400  |
| H  | 3.11548400  | 2.79810100  | 2.83038900  |
| H  | 1.93057200  | 0.94970000  | 2.01469000  |

|   |             |             |             |
|---|-------------|-------------|-------------|
| C | 4.27627400  | 2.69684600  | 0.96933900  |
| H | 5.05146100  | 2.28318200  | 1.62343600  |
| H | 4.64066300  | 3.66705100  | 0.61692800  |
| C | 3.94152100  | 1.74928400  | -0.15772800 |
| C | 4.70339700  | 1.39796000  | -1.27053300 |
| C | 2.66210400  | 1.21995800  | 0.00206600  |
| C | 4.15396600  | 0.53364100  | -2.22089200 |
| H | 5.69908000  | 1.80896800  | -1.41269400 |
| C | 2.10506400  | 0.36262500  | -0.94202700 |
| C | 2.86024300  | 0.02532800  | -2.06626200 |
| H | 4.73194400  | 0.26843400  | -3.10114100 |
| H | 1.09842500  | -0.02497200 | -0.81271700 |
| H | 2.44030100  | -0.66159900 | -2.79353600 |
| H | 2.29814000  | 4.14604300  | -0.48435200 |
| H | 1.36180500  | 5.41062400  | 0.34991800  |
| H | -5.93572400 | 2.44334500  | 0.17945500  |
| H | -3.84614100 | 0.78086400  | -3.17545600 |
| C | -3.74516700 | 3.18275200  | 1.64530500  |
| H | -3.16996300 | 4.11218900  | 1.61802600  |
| H | -3.25020500 | 2.51781700  | 2.36080700  |
| H | -4.75031600 | 3.39963500  | 2.01115500  |
| C | -1.30912600 | 1.20949400  | -2.30065700 |
| H | -0.97078800 | 0.22744200  | -1.94788900 |
| H | -0.51807300 | 1.93473600  | -2.09038800 |
| H | -1.44253400 | 1.14375600  | -3.38257000 |
| C | -6.35361000 | 1.22595600  | -2.21790400 |
| H | -6.25347500 | 0.35528000  | -2.87017000 |
| H | -6.72051500 | 2.05758200  | -2.82844100 |

|                        |             |             |                             |
|------------------------|-------------|-------------|-----------------------------|
| H                      | -7.11538000 | 1.00795400  | -1.46542300                 |
| C                      | -7.20421120 | -4.68847063 | 0.52895717                  |
| H                      | -7.37524851 | -4.84546057 | -0.51555247                 |
| H                      | -8.01341148 | -4.12313665 | 0.94186441                  |
| H                      | -7.13955705 | -5.63389585 | 1.02583843                  |
| TS3BA                  |             |             | -1423.48                    |
| Zero-point correction= |             |             | 0.583993 (Hartree/Particle) |
| C                      | 2.04086500  | -0.13880800 | 1.16167600                  |
| C                      | 4.74772300  | -0.77686800 | 1.63117400                  |
| C                      | 2.76729200  | 0.53064900  | 2.14987200                  |
| C                      | 2.68093800  | -1.12856500 | 0.42628900                  |
| C                      | 4.02394200  | -1.44394000 | 0.64738600                  |
| C                      | 4.10564800  | 0.20940600  | 2.38669300                  |
| C                      | 4.46646700  | -2.54652300 | -0.28946100                 |
| C                      | 3.13919900  | -3.17082600 | -0.73307000                 |
| C                      | 2.14371500  | -1.98466300 | -0.70264300                 |
| N                      | 0.77656100  | -2.47693300 | -0.51380200                 |
| C                      | 0.49047100  | -3.75324200 | -0.10367100                 |
| C                      | 1.57999400  | -4.77431100 | -0.01572200                 |
| O                      | 2.80545900  | -4.13474200 | 0.25289700                  |
| N                      | -0.77145700 | -3.91923600 | 0.12633300                  |
| N                      | -1.33004900 | -2.69581900 | -0.15435900                 |
| C                      | -0.40210600 | -1.77541200 | -0.52823300                 |
| C                      | -2.74247300 | -2.53049300 | -0.01389600                 |
| C                      | -5.46376000 | -2.10633000 | 0.27503000                  |
| C                      | -3.53762600 | -2.50324700 | -1.16050400                 |
| C                      | -3.25886800 | -2.35652400 | 1.27406700                  |
| C                      | -4.63935300 | -2.15497000 | 1.39526300                  |

|   |             |             |             |
|---|-------------|-------------|-------------|
| C | -4.90411700 | -2.29141700 | -0.99948700 |
| C | -2.92698600 | -2.66250500 | -2.52511200 |
| C | -2.34955900 | -2.35292100 | 2.46534400  |
| H | 1.00430700  | 0.12907700  | 0.98556100  |
| H | 5.78525800  | -1.03424200 | 1.82732300  |
| H | 2.28021300  | 1.32388300  | 2.70719400  |
| H | 4.65219500  | 0.72848500  | 3.16851300  |
| H | 5.00210900  | -2.14576500 | -1.15847000 |
| H | 5.10150500  | -3.30010000 | 0.18238200  |
| H | 3.18257700  | -3.64900500 | -1.72158600 |
| H | 2.15173400  | -1.42229800 | -1.63805400 |
| H | 1.63321300  | -5.33794200 | -0.95966800 |
| H | 1.37300600  | -5.47101400 | 0.79716700  |
| H | -5.06500200 | -2.01949000 | 2.38515600  |
| H | -5.54416800 | -2.25979600 | -1.87753800 |
| H | -3.69156900 | -2.78217300 | -3.28251800 |
| H | -2.25651400 | -3.52615600 | -2.55939800 |
| H | -2.32987000 | -1.77324800 | -2.77973200 |
| H | -1.82996200 | -3.31033000 | 2.56449800  |
| H | -1.57560000 | -1.57473000 | 2.35572300  |
| H | -2.90615700 | -2.15784900 | 3.38306300  |
| C | -0.52069800 | -0.39519700 | -0.90944900 |
| C | -1.63660200 | 0.31596800  | -0.51765500 |
| H | -2.39531800 | -0.19411200 | 0.07389600  |
| C | -1.71444700 | 1.73619800  | -0.68099100 |
| H | -1.17588700 | 2.09828800  | -1.55214500 |
| C | -2.98355400 | 2.45594900  | -0.41129800 |
| C | -2.97618800 | 3.86107600  | -0.41557500 |

|    |             |             |             |
|----|-------------|-------------|-------------|
| C  | -4.20483200 | 1.83240600  | -0.10824200 |
| C  | -4.11341000 | 4.60034800  | -0.14184200 |
| H  | -2.03835400 | 4.37799700  | -0.64574100 |
| C  | -5.34354900 | 2.57919300  | 0.18785700  |
| H  | -4.27513100 | 0.74735300  | -0.11859800 |
| C  | -5.32855200 | 3.97231300  | 0.17344300  |
| H  | -4.06873800 | 5.68744700  | -0.16096800 |
| H  | -6.26741700 | 2.05624500  | 0.41430600  |
| C  | -6.55567800 | 4.77139200  | 0.49640200  |
| H  | -6.73317000 | 5.56139200  | -0.24210600 |
| H  | -7.44367600 | 4.14451700  | 0.53614200  |
| H  | -6.46167500 | 5.26587000  | 1.47516800  |
| O  | 0.52858000  | 0.13354500  | -1.52185600 |
| H  | 0.93120800  | 1.37273700  | -1.07642900 |
| C  | 1.26046200  | 2.75430900  | 0.41509800  |
| O  | 2.14901100  | 3.45645600  | 0.91996900  |
| O  | 0.16681600  | 2.42588800  | 1.01860000  |
| H  | -0.78557000 | 2.10350300  | 0.22187000  |
| O  | 1.46016400  | 2.27828900  | -0.82522800 |
| Cs | 4.41600500  | 2.18028800  | -0.56368800 |
| C  | -6.93486500 | -1.79479600 | 0.41625100  |
| H  | -7.12171200 | -0.63922300 | 0.02402800  |
| H  | -7.56292300 | -2.57717600 | -0.29180200 |
| H  | -7.25178000 | -1.90545600 | 1.59336100  |

M05BA

Zero-point correction= 0.591343 (Hartree/Particle)

|   |             |             |             |
|---|-------------|-------------|-------------|
| C | -2.86297200 | -3.46454000 | -0.75316600 |
| C | -2.24418900 | -2.77796200 | 0.28570400  |

|    |             |             |             |
|----|-------------|-------------|-------------|
| C  | -2.98016100 | -2.35509800 | 1.39789100  |
| C  | -4.34726600 | -2.63022300 | 1.44577800  |
| C  | -4.96958400 | -3.32540900 | 0.40806900  |
| C  | -4.22952700 | -3.74511700 | -0.69460800 |
| H  | -2.26536100 | -3.76985000 | -1.60726400 |
| H  | -1.18239600 | -2.55179000 | 0.20941500  |
| H  | -4.93048800 | -2.29660200 | 2.30127600  |
| H  | -6.03360100 | -3.53862900 | 0.46277000  |
| C  | -2.29490800 | -1.51580100 | 2.46088100  |
| H  | -2.89262400 | -1.51548300 | 3.37974500  |
| C  | -2.12092400 | -0.13064200 | 1.91008600  |
| C  | -0.92469400 | 0.30024300  | 1.42810800  |
| H  | -3.01934000 | 0.45069500  | 1.74171900  |
| O  | 0.24859700  | -0.22946700 | 1.51840200  |
| C  | 1.49154300  | -2.58325900 | -0.80612000 |
| O  | 2.48880000  | -3.16485400 | -1.28720200 |
| O  | 0.46418000  | -2.16516100 | -1.37885200 |
| O  | 1.59010000  | -2.33535000 | 0.56252200  |
| Cs | 4.54315200  | -1.99970500 | 0.48147000  |
| C  | -0.23855900 | 3.39499600  | -0.35763200 |
| N  | -1.47142700 | 3.26636300  | -0.74647000 |
| N  | 0.12248000  | 2.39445900  | 0.49929500  |
| N  | -1.89376200 | 2.12489300  | -0.12050000 |
| C  | -0.94207600 | 1.58063500  | 0.65321600  |
| C  | -3.15747800 | 1.52427900  | -0.45221400 |
| C  | -3.13478600 | 0.39108600  | -1.26583000 |
| C  | -4.31793600 | 2.04043800  | 0.12834100  |
| C  | -4.34848200 | -0.27117900 | -1.45390200 |

|   |             |             |             |
|---|-------------|-------------|-------------|
| C | -5.50276500 | 1.34731300  | -0.09836500 |
| C | -5.52815900 | 0.17650200  | -0.86398800 |
| C | 0.78281200  | 4.45053400  | -0.62930900 |
| C | 1.51294600  | 2.24231300  | 0.92618000  |
| C | 2.17598900  | 3.64482200  | 1.15126700  |
| O | 1.43207600  | 4.72275600  | 0.59849900  |
| H | 2.22450300  | 3.87495500  | 2.21628900  |
| H | 1.50486400  | 1.62538900  | 1.82423100  |
| C | 3.58899500  | 3.52273000  | 0.52823500  |
| H | 4.33664200  | 3.37664300  | 1.31554600  |
| H | 3.84579500  | 4.45052600  | 0.00810000  |
| C | 3.51248100  | 2.32374600  | -0.38674600 |
| C | 4.41203600  | 1.89473800  | -1.36113500 |
| C | 2.33557300  | 1.61004200  | -0.17401300 |
| C | 4.09619800  | 0.76386700  | -2.11879800 |
| H | 5.33086500  | 2.44365200  | -1.54741500 |
| C | 2.00382100  | 0.49046600  | -0.92800000 |
| C | 2.89862500  | 0.06945900  | -1.91263100 |
| H | 4.78104000  | 0.43324100  | -2.89450200 |
| H | 1.08131300  | -0.05687700 | -0.75673900 |
| H | 2.65200600  | -0.81514100 | -2.49311500 |
| H | 1.48901700  | 4.10969300  | -1.39937400 |
| H | 0.30270500  | 5.36892300  | -0.96636100 |
| H | -6.42219200 | 1.71312100  | 0.35283600  |
| H | -4.35819900 | -1.17974300 | -2.04918900 |
| C | -4.25730100 | 3.25948400  | 1.00949600  |
| H | -3.84101100 | 4.11622500  | 0.47229800  |
| H | -3.61612400 | 3.07682800  | 1.87932500  |



|   |             |             |             |
|---|-------------|-------------|-------------|
| H | -5.25251600 | 3.52406900  | 1.36992200  |
| C | -1.85799700 | -0.12126700 | -1.86934600 |
| H | -1.24318400 | -0.66777400 | -1.14443900 |
| H | -1.25371200 | 0.69591900  | -2.27836000 |
| H | -2.07264600 | -0.82574400 | -2.67469700 |
| C | -6.81280100 | -0.59182000 | -1.03213800 |
| H | -6.66318400 | -1.47251500 | -1.65996800 |
| H | -7.59101100 | 0.03047200  | -1.48410900 |
| H | -7.18404500 | -0.93244200 | -0.06053500 |
| H | -1.30895000 | -1.93138200 | 2.69086900  |
| H | 0.90045800  | -1.68256100 | 0.82850300  |
| C | -4.91608388 | -4.51158518 | -1.84036809 |
| H | -5.97710712 | -4.47858586 | -1.70605227 |
| H | -4.58745204 | -5.52985694 | -1.83549598 |
| H | -4.66071557 | -4.05885857 | -2.77563577 |

TS3BA1 -1370.72

Zero-point correction= 0.583552 (Hartree/Particle)

|   |             |             |             |
|---|-------------|-------------|-------------|
| C | -2.07158800 | 0.16160400  | 1.14765600  |
| C | -4.79256600 | 0.77326300  | 1.57125800  |
| C | -2.79929100 | -0.49154200 | 2.14598200  |
| C | -2.71775300 | 1.12220800  | 0.37973600  |
| C | -4.06685000 | 1.42562700  | 0.57902900  |
| C | -4.14519300 | -0.18430800 | 2.35845500  |
| C | -4.51272700 | 2.49956300  | -0.38900200 |
| C | -3.18828500 | 3.13096200  | -0.83042300 |
| C | -2.17972600 | 1.95740300  | -0.76429200 |
| N | -0.81915500 | 2.46891600  | -0.57368900 |
| C | -0.55406900 | 3.75678000  | -0.18517100 |

|   |             |             |             |
|---|-------------|-------------|-------------|
| C | -1.65642800 | 4.76613800  | -0.12889200 |
| O | -2.87695200 | 4.11791400  | 0.14002300  |
| N | 0.70328900  | 3.94401200  | 0.05370700  |
| N | 1.27979600  | 2.72380300  | -0.19851700 |
| C | 0.36951900  | 1.78417100  | -0.56708400 |
| C | 2.68582900  | 2.55015800  | -0.00579400 |
| C | 5.37864600  | 2.02367000  | 0.36408600  |
| C | 3.52165600  | 2.54123200  | -1.12332700 |
| C | 3.14871900  | 2.32500800  | 1.29333000  |
| C | 4.50830100  | 2.06928900  | 1.45597800  |
| C | 4.87334600  | 2.27588200  | -0.91200400 |
| C | 2.95757300  | 2.74705400  | -2.50184400 |
| C | 2.18385800  | 2.29707300  | 2.44743200  |
| H | -1.03013700 | -0.09746200 | 0.98690200  |
| H | -5.83570700 | 1.02066400  | 1.74946600  |
| H | -2.30816700 | -1.26270400 | 2.73052400  |
| H | -4.69320400 | -0.69074600 | 3.14762600  |
| H | -5.03165900 | 2.07086000  | -1.25466300 |
| H | -5.16382100 | 3.25509200  | 0.05710100  |
| H | -3.22575000 | 3.58895400  | -1.82869000 |
| H | -2.17343900 | 1.37368800  | -1.68615100 |
| H | -1.70622200 | 5.30956300  | -1.08485200 |
| H | -1.46594300 | 5.48197900  | 0.67128900  |
| H | 4.89357300  | 1.87927400  | 2.45494700  |
| H | 5.54364300  | 2.24882400  | -1.76736400 |
| H | 3.75749800  | 2.86054000  | -3.23506800 |
| H | 2.31867800  | 3.63408800  | -2.53959100 |
| H | 2.34773100  | 1.88256700  | -2.78750700 |

|   |             |             |             |
|---|-------------|-------------|-------------|
| H | 1.64297600  | 3.24391900  | 2.53290300  |
| H | 1.43976400  | 1.50518900  | 2.30128500  |
| H | 2.70647700  | 2.10480400  | 3.38556200  |
| C | 0.50606300  | 0.39518800  | -0.92071400 |
| C | 1.64595900  | -0.28875500 | -0.55388300 |
| H | 2.44099900  | 0.23839900  | -0.04072800 |
| C | 1.74976500  | -1.71396600 | -0.70226600 |
| H | 1.22762000  | -2.09819000 | -1.58382000 |
| C | 3.04343200  | -2.37721400 | -0.42522500 |
| C | 3.39854900  | -3.55537800 | -1.09918700 |
| C | 3.95187200  | -1.89901900 | 0.53317900  |
| C | 4.59301900  | -4.21526400 | -0.83650000 |
| H | 2.71942200  | -3.95287500 | -1.84951400 |
| C | 5.14955000  | -2.55858800 | 0.78868700  |
| H | 3.71716500  | -1.00115400 | 1.10012400  |
| C | 5.49594500  | -3.73038300 | 0.11294800  |
| H | 4.83432000  | -5.12337200 | -1.38505700 |
| H | 5.82911500  | -2.15788000 | 1.53859000  |
| C | 6.77771100  | -4.46267700 | 0.41964300  |
| H | 7.53563800  | -3.78340600 | 0.81920800  |
| H | 6.61901100  | -5.25062900 | 1.16430600  |
| H | 7.18759100  | -4.93854100 | -0.47565400 |
| O | -0.54816100 | -0.16100400 | -1.49694300 |
| H | -0.92064800 | -1.41216300 | -1.04364100 |
| C | -1.19789800 | -2.73246700 | 0.48844600  |
| O | -2.06144600 | -3.43027600 | 1.03994700  |
| O | -0.10379500 | -2.34591500 | 1.05498800  |
| H | 0.83316400  | -2.07323100 | 0.22268600  |

|   |             |             |             |
|---|-------------|-------------|-------------|
| O | -1.42528400 | -2.32079900 | -0.77063900 |
| C | 6.82726000  | 1.66031600  | 0.55721200  |
| H | 6.95116600  | 0.57366600  | 0.50143400  |
| H | 7.45583000  | 2.10581400  | -0.21707900 |
| H | 7.19287900  | 1.98833600  | 1.533031    |

M3

Zero-point correction= 0.560087 (Hartree/Particle)

|   |             |             |             |
|---|-------------|-------------|-------------|
| C | -4.00087500 | -3.43341700 | 0.58097500  |
| C | -2.77313400 | -3.00907300 | 0.08738900  |
| C | -2.70036500 | -2.04478400 | -0.92566100 |
| C | -3.90292800 | -1.54376600 | -1.43892000 |
| C | -5.12871600 | -1.96730900 | -0.94051700 |
| C | -5.20023900 | -2.91893400 | 0.07961400  |
| H | -4.03305900 | -4.18278000 | 1.36834900  |
| H | -1.85828500 | -3.43600600 | 0.48891600  |
| H | -3.86746900 | -0.78963700 | -2.22113400 |
| H | -6.04759100 | -1.55097600 | -1.34606600 |
| C | -1.42872800 | -1.48221400 | -1.40356100 |
| H | -1.62960379 | -0.45369642 | -1.61966399 |
| C | -0.26950300 | -1.49340800 | -0.74497800 |
| C | -6.53161800 | -3.39917800 | 0.59772600  |
| H | -6.95047200 | -4.17243100 | -0.05498500 |
| H | -6.43650700 | -3.82785500 | 1.59824500  |
| H | -7.25624100 | -2.58179400 | 0.64213700  |
| C | 0.94089100  | -0.74640000 | -1.28708900 |
| H | -0.15449000 | -1.99993500 | 0.21568800  |
| O | 0.79007300  | -0.09242300 | -2.43167100 |
| C | -2.18724800 | 0.46757200  | 1.08661600  |

|   |             |             |             |
|---|-------------|-------------|-------------|
| C | -4.10123800 | 2.47755800  | 0.63510300  |
| C | -3.44165300 | 0.40114900  | 1.69315200  |
| C | -1.91046000 | 1.53209800  | 0.24138200  |
| C | -2.85162200 | 2.54465000  | 0.03514700  |
| C | -4.39459500 | 1.39063900  | 1.45995600  |
| C | -2.27922900 | 3.62467400  | -0.85645900 |
| C | -0.77559100 | 3.36589300  | -0.75354900 |
| C | -0.68905300 | 1.83298100  | -0.60541500 |
| N | 0.61782300  | 1.48812200  | -0.04562100 |
| C | 1.45014000  | 2.39006500  | 0.55771100  |
| C | 1.02630700  | 3.82034600  | 0.72713300  |
| O | -0.34604200 | 3.97276600  | 0.46222200  |
| N | 2.62151800  | 1.87451400  | 0.78957000  |
| N | 2.51722300  | 0.60078500  | 0.28648600  |
| C | 1.32465700  | 0.35530100  | -0.25273200 |
| C | 3.65756900  | -0.27220700 | 0.28384900  |
| C | 5.85182800  | -1.94967100 | 0.26431200  |
| C | 4.42211600  | -0.34332300 | -0.88390600 |
| C | 3.94236800  | -1.00107500 | 1.43796800  |
| C | 5.05532700  | -1.83975200 | 1.40487600  |
| C | 5.52057500  | -1.20065200 | -0.86710600 |
| C | 4.05914000  | 0.47539900  | -2.09441300 |
| C | 3.06760800  | -0.88012000 | 2.65686200  |
| C | 7.06594200  | -2.84235700 | 0.25951400  |
| H | -1.45156200 | -0.30926700 | 1.26497600  |
| H | -4.83401300 | 3.26329400  | 0.47630800  |
| H | -3.67961700 | -0.43915600 | 2.33748000  |
| H | -5.36880500 | 1.32110100  | 1.93354600  |

|   |             |             |             |
|---|-------------|-------------|-------------|
| H | -2.60836300 | 3.50641500  | -1.89510000 |
| H | -2.52290000 | 4.63858200  | -0.53065900 |
| H | -0.18705200 | 3.74363300  | -1.59975900 |
| H | -0.71270600 | 1.32224200  | -1.57818800 |
| H | 1.63501100  | 4.43492200  | 0.04787900  |
| H | 1.20450300  | 4.15628600  | 1.75029300  |
| H | 5.30221500  | -2.42309800 | 2.28833400  |
| H | 6.13261600  | -1.28431000 | -1.76176100 |
| H | 4.76414000  | 0.28427600  | -2.90522200 |
| H | 4.09932300  | 1.54322100  | -1.85214400 |
| H | 3.04036900  | 0.25964300  | -2.44656400 |
| H | 3.42891800  | -1.52673700 | 3.45774200  |
| H | 3.04850700  | 0.15061800  | 3.02299100  |
| H | 2.03455200  | -1.16245000 | 2.42725500  |
| H | 6.97193300  | -3.64174800 | 0.99766000  |
| H | 7.96610100  | -2.26872800 | 0.50285400  |
| H | 7.21866700  | -3.29489900 | -0.72295400 |
| H | -1.23432506 | -1.95998208 | -2.34102842 |

RR-TS4 -289.65

Zero-point correction= 0.810814 (Hartree/Particle)

|    |             |             |             |
|----|-------------|-------------|-------------|
| C  | -0.30074500 | -0.15721200 | -0.68863900 |
| C  | -0.55307000 | 2.40352400  | -0.57811900 |
| C  | 1.61213000  | 1.71188100  | -1.43782300 |
| C  | 0.37782900  | 2.45453600  | -1.59132900 |
| C  | 1.15594100  | -0.22168900 | -0.82577100 |
| O  | -0.34908900 | 1.56833600  | 0.39449800  |
| O  | -0.99916400 | -0.04218600 | -1.71157600 |
| Si | 2.87333300  | 2.38185000  | -0.19171400 |

|   |             |             |             |
|---|-------------|-------------|-------------|
| C | 3.82501500  | 3.69825500  | -1.16226600 |
| C | 4.12971300  | 1.10395400  | 0.39026200  |
| C | 2.09238300  | 3.19703500  | 1.30802300  |
| C | 1.63261700  | -1.07522600 | -1.99829900 |
| C | 3.13679100  | -1.18434600 | -2.04727800 |
| C | 5.96306400  | -1.35861000 | -2.03562500 |
| C | 3.90144500  | -0.49684900 | -2.98839100 |
| C | 3.80877100  | -1.97277200 | -1.10693100 |
| C | 5.19419900  | -2.05865100 | -1.09859100 |
| C | 5.29410400  | -0.57986800 | -2.97957000 |
| C | -1.86109200 | 3.11659200  | -0.61746000 |
| C | -4.34633400 | 4.43414100  | -0.59342500 |
| C | -2.12785300 | 4.16053900  | -1.51240600 |
| C | -2.85452200 | 2.76090100  | 0.30320500  |
| C | -4.08530900 | 3.41185200  | 0.31590000  |
| C | -3.35917200 | 4.80610800  | -1.50587900 |
| H | 2.10954400  | 1.52561200  | -2.39463400 |
| H | 0.14205500  | 2.92567100  | -2.54000500 |
| H | 1.72397200  | -0.35368500 | 0.09038900  |
| H | 4.58674100  | 4.17622300  | -0.53765500 |
| H | 3.15034800  | 4.47837600  | -1.52864700 |
| H | 4.33030400  | 3.25547000  | -2.02725100 |
| H | 4.82995700  | 1.58868600  | 1.08148100  |
| H | 4.70411900  | 0.69554200  | -0.44741300 |
| H | 3.66397100  | 0.26706300  | 0.92010400  |
| H | 2.84271200  | 3.79806900  | 1.83310000  |
| H | 1.25992300  | 3.84516000  | 1.02214600  |
| H | 1.70714400  | 2.43996100  | 1.99196400  |

|   |             |             |             |
|---|-------------|-------------|-------------|
| H | 1.21259300  | -2.08983400 | -1.91612300 |
| H | 1.23704800  | -0.65805900 | -2.92775600 |
| H | 3.40469400  | 0.10997700  | -3.74133500 |
| H | 3.22981700  | -2.51544100 | -0.36234100 |
| H | 5.69294200  | -2.67350400 | -0.35262800 |
| H | 5.86872700  | -0.03153400 | -3.72156300 |
| H | -5.30354900 | 4.94560100  | -0.58473500 |
| H | -1.35924000 | 4.48087800  | -2.20893100 |
| H | -2.64171700 | 1.97118300  | 1.01841700  |
| H | -4.83696900 | 3.12077400  | 1.04518400  |
| H | -3.54690900 | 5.61176600  | -2.20902400 |
| C | 7.46713400  | -1.45913600 | -2.02243900 |
| H | 7.79572900  | -2.47595500 | -2.25912600 |
| H | 7.91493300  | -0.78265900 | -2.75351400 |
| H | 7.86951000  | -1.20787600 | -1.03675200 |
| C | -1.05626700 | -0.59646000 | 0.54000100  |
| N | -0.65042700 | -0.96539300 | 1.76169700  |
| N | -2.40503300 | -0.69600300 | 0.58029900  |
| N | -1.69926800 | -1.25540300 | 2.59459200  |
| C | 0.68224800  | -1.00558100 | 2.29234500  |
| C | -2.74420700 | -1.08908200 | 1.84581500  |
| C | -3.43147200 | -0.50488400 | -0.46206400 |
| C | 1.48892000  | -2.10211200 | 1.97824600  |
| C | 1.08777100  | 0.03199900  | 3.13348800  |
| C | -4.19247200 | -1.14258200 | 2.19815600  |
| H | -3.05071400 | 0.26139200  | -1.13424200 |
| C | -4.80755000 | -0.08227700 | 0.17733900  |
| C | -3.72071000 | -1.81009500 | -1.16812100 |



|   |             |             |             |
|---|-------------|-------------|-------------|
| C | 2.78989900  | -2.10174700 | 2.47418500  |
| C | 0.95993000  | -3.22402400 | 1.12550000  |
| C | 2.40139400  | -0.01496500 | 3.60454300  |
| C | 0.13575700  | 1.12837400  | 3.52753100  |
| H | -4.31841200 | -1.06480500 | 3.27781200  |
| H | -4.64780900 | -2.07997700 | 1.84846500  |
| O | -4.79032100 | -0.01317400 | 1.59484300  |
| C | -5.85779800 | -1.08925200 | -0.35406100 |
| H | -5.03428200 | 0.93626600  | -0.13640200 |
| C | -5.07023800 | -2.14305400 | -1.08771000 |
| C | -2.80941800 | -2.63193600 | -1.82654000 |
| C | 3.26721800  | -1.05609900 | 3.27000500  |
| H | 3.44700000  | -2.93461700 | 2.23393500  |
| H | 0.72861500  | -2.87631100 | 0.11207200  |
| H | 0.03712200  | -3.63391000 | 1.54725500  |
| H | 1.69224200  | -4.02975600 | 1.04850400  |
| H | 2.75575800  | 0.79055900  | 4.24288800  |
| H | -0.67177600 | 0.72296900  | 4.14477800  |
| H | -0.30692400 | 1.58568000  | 2.63604400  |
| H | 0.65690700  | 1.89712600  | 4.10111500  |
| H | -6.44731800 | -1.49298300 | 0.47620300  |
| H | -6.56120700 | -0.58569200 | -1.02398900 |
| C | -5.53355300 | -3.32305300 | -1.66553100 |
| C | -3.27491400 | -3.81274400 | -2.39771000 |
| H | -1.76743500 | -2.33594100 | -1.90328700 |
| C | 4.70454900  | -1.03785500 | 3.71723400  |
| C | -4.62717600 | -4.15629300 | -2.31535000 |
| H | -6.58462800 | -3.59020500 | -1.60779200 |

|                        |             |                             |             |
|------------------------|-------------|-----------------------------|-------------|
| H                      | -2.58451200 | -4.46905200                 | -2.91730100 |
| H                      | 5.33400400  | -0.61656200                 | 2.92554100  |
| H                      | 4.83642200  | -0.42473600                 | 4.61103100  |
| H                      | 5.06826400  | -2.04605000                 | 3.92942100  |
| H                      | -4.97438200 | -5.08040800                 | -2.76635800 |
| RS-TS4                 |             | -216.21                     |             |
| Zero-point correction= |             | 0.809661 (Hartree/Particle) |             |
| C                      | 0.06043400  | 0.32094900                  | -0.31729700 |
| C                      | -0.55614100 | 2.84067300                  | -0.26384900 |
| C                      | 1.80029900  | 2.54975500                  | -0.41433100 |
| C                      | 0.61253000  | 3.16044000                  | -0.93188700 |
| C                      | 1.49872200  | 0.49422500                  | -0.56233200 |
| O                      | -0.48834700 | 1.99988200                  | 0.71405400  |
| O                      | -0.73528500 | 0.30800600                  | -1.27860000 |
| C                      | 1.90914300  | 0.10466000                  | -1.97373600 |
| C                      | 1.90077900  | -1.39581800                 | -2.15734400 |
| C                      | 1.88040500  | -4.21771200                 | -2.39060500 |
| C                      | 3.00949200  | -2.15766300                 | -1.78203800 |
| C                      | 0.77982100  | -2.06592800                 | -2.66012400 |
| C                      | 0.77142100  | -3.45376500                 | -2.76879300 |
| C                      | 3.00104800  | -3.54552400                 | -1.89982100 |
| C                      | -1.89949500 | 3.35266800                  | -0.65553000 |
| C                      | -4.46111300 | 4.31354600                  | -1.28025100 |
| C                      | -2.19703200 | 3.79702200                  | -1.94821900 |
| C                      | -2.90623600 | 3.38821600                  | 0.31603200  |
| C                      | -4.17633200 | 3.86809300                  | 0.00917400  |
| C                      | -3.46717400 | 4.27348500                  | -2.25696300 |
| H                      | 0.61426500  | 3.75382500                  | -1.84088500 |

|   |             |             |             |
|---|-------------|-------------|-------------|
| H | 2.18773900  | 0.16034800  | 0.20648900  |
| H | 1.22706600  | 0.58474600  | -2.67990900 |
| H | 2.91967800  | 0.47039300  | -2.17331800 |
| H | 3.89075500  | -1.65629400 | -1.38623100 |
| H | -0.08704200 | -1.48212500 | -2.95627400 |
| H | -0.10801900 | -3.95564900 | -3.16684700 |
| H | 3.87772000  | -4.11704700 | -1.60323500 |
| H | -5.45085000 | 4.68641700  | -1.52396700 |
| H | -1.43792900 | 3.74081300  | -2.72189400 |
| H | -2.66417200 | 3.03382400  | 1.31425800  |
| H | -4.94323500 | 3.90193700  | 0.77820200  |
| H | -3.68648200 | 4.60527100  | -3.26709700 |
| C | 1.86388500  | -5.71895200 | -2.52892200 |
| H | 1.88880100  | -6.01780300 | -3.58170800 |
| H | 2.72588100  | -6.17159900 | -2.03349500 |
| H | 0.95694500  | -6.14573700 | -2.09105000 |
| C | -0.46695000 | -0.28932700 | 0.95958400  |
| N | 0.15572500  | -0.78348100 | 2.03307400  |
| N | -1.77756700 | -0.45883700 | 1.21744200  |
| N | -0.71649000 | -1.24837900 | 2.98117600  |
| C | 1.57135400  | -0.90962700 | 2.22163900  |
| C | -1.88289900 | -1.04304300 | 2.44589100  |
| C | -2.96647100 | -0.15378400 | 0.41678800  |
| C | 2.19110500  | -2.04471300 | 1.70016000  |
| C | 2.25559900  | 0.14311500  | 2.83203300  |
| C | -3.25716700 | -1.22719600 | 2.99795500  |
| H | -2.69843000 | 0.66756200  | -0.24916000 |
| C | -4.17971400 | 0.22326800  | 1.34277000  |

|   |             |             |             |
|---|-------------|-------------|-------------|
| C | -3.42784700 | -1.38703800 | -0.32739900 |
| C | 3.58384800  | -2.08753000 | 1.75682900  |
| C | 1.37579500  | -3.13480800 | 1.05930600  |
| C | 3.64482400  | 0.04764800  | 2.87094200  |
| C | 1.50861100  | 1.32580500  | 3.38650200  |
| H | -3.21624900 | -1.35820500 | 4.07898100  |
| H | -3.74483600 | -2.10152500 | 2.54414900  |
| O | -3.95897200 | -0.03100300 | 2.72399400  |
| C | -5.38294800 | -0.57414700 | 0.78518400  |
| H | -4.35209100 | 1.29795700  | 1.29067600  |
| C | -4.78136400 | -1.62788800 | -0.10929200 |
| C | -2.65566400 | -2.23356600 | -1.11631500 |
| C | 4.32230900  | -1.04384800 | 2.31761800  |
| H | 4.10002900  | -2.94767500 | 1.33737100  |
| H | 0.95231900  | -2.79349200 | 0.10558100  |
| H | 0.54987900  | -3.43767000 | 1.70963500  |
| H | 1.99641800  | -4.00624800 | 0.84661900  |
| H | 4.21498300  | 0.85276700  | 3.32871900  |
| H | 0.87722800  | 1.02015400  | 4.22692700  |
| H | 0.85315100  | 1.76751000  | 2.62637100  |
| H | 2.20608500  | 2.08767400  | 3.73913400  |
| H | -5.97206100 | -0.98652800 | 1.61039300  |
| H | -6.04235900 | 0.08966200  | 0.21633900  |
| C | -5.39630200 | -2.73097400 | -0.69621200 |
| C | -3.27207500 | -3.33978100 | -1.69537700 |
| H | -1.60146100 | -2.02320400 | -1.27335700 |
| C | 5.82826900  | -1.06751100 | 2.30142800  |
| C | -4.63224900 | -3.58445800 | -1.48884700 |

|    |             |             |             |
|----|-------------|-------------|-------------|
| H  | -6.45143200 | -2.92833800 | -0.53153500 |
| H  | -2.69197200 | -4.01853900 | -2.31228700 |
| H  | 6.20566900  | -0.42522000 | 1.49805200  |
| H  | 6.24020900  | -0.69376300 | 3.24199400  |
| H  | 6.20963900  | -2.07653900 | 2.13261700  |
| H  | -5.09706100 | -4.45179800 | -1.94682800 |
| H  | 1.76566500  | 2.46925800  | 0.67600400  |
| Si | 3.52027700  | 3.00212700  | -1.01724400 |
| C  | 4.75886200  | 1.73578600  | -0.36302600 |
| H  | 4.61311400  | 0.73555900  | -0.78202600 |
| H  | 5.78630800  | 2.04741700  | -0.57596900 |
| H  | 4.64836600  | 1.65316300  | 0.72450000  |
| C  | 3.95190900  | 4.67243200  | -0.25233800 |
| H  | 3.92720200  | 4.62172500  | 0.84048000  |
| H  | 4.95329000  | 4.99659300  | -0.55344200 |
| H  | 3.23777000  | 5.43932700  | -0.56681200 |
| C  | 3.60165900  | 3.18572200  | -2.89070800 |
| H  | 2.90815300  | 3.96631300  | -3.21981400 |
| H  | 4.60763600  | 3.48976800  | -3.19712400 |
| H  | 3.34729100  | 2.26760000  | -3.42492000 |

SR-TS4 -230.50

Zero-point correction= 0.810108 (Hartree/Particle)

|   |             |             |             |
|---|-------------|-------------|-------------|
| C | -0.07286900 | 0.23007600  | 0.29334900  |
| C | -2.38768300 | 0.10336600  | 1.64227000  |
| C | -2.49341500 | 1.72928000  | -0.09368600 |
| C | -2.77286100 | 1.38109500  | 1.26696800  |
| C | -0.42051900 | 1.55098400  | -0.25507600 |
| O | -1.81514300 | -0.65940000 | 0.77952200  |

|   |             |             |             |
|---|-------------|-------------|-------------|
| C | 0.17396400  | 2.70307300  | 0.54046400  |
| C | 1.68868300  | 2.71975000  | 0.49975400  |
| C | 4.51140700  | 2.54817700  | 0.32119500  |
| C | 2.36471900  | 3.14344700  | -0.64763900 |
| C | 2.45026200  | 2.22931700  | 1.56777000  |
| C | 3.83356500  | 2.13757900  | 1.47450300  |
| C | 3.75525900  | 3.05855400  | -0.73704000 |
| C | -2.50408200 | -0.38124900 | 3.04633200  |
| C | -2.67412500 | -1.32969800 | 5.67259800  |
| C | -1.52726800 | -1.24594600 | 3.54964400  |
| C | -3.56865600 | -0.00060700 | 3.86766800  |
| C | -3.65274600 | -0.47196200 | 5.17500200  |
| C | -1.61011400 | -1.71367500 | 4.85639000  |
| H | -3.06229500 | 2.11937900  | 2.00862800  |
| H | -0.30133800 | 1.62942900  | -1.33736100 |
| H | -0.20713800 | 3.64964100  | 0.14188300  |
| H | -0.17092300 | 2.61265700  | 1.57561800  |
| H | 1.79537600  | 3.53135700  | -1.49044000 |
| H | 1.93786800  | 1.87004100  | 2.45316800  |
| H | 4.40138200  | 1.72432000  | 2.30499700  |
| H | 4.25935200  | 3.39674600  | -1.63973400 |
| H | -2.74048700 | -1.69835000 | 6.69153000  |
| H | -0.69651600 | -1.50396700 | 2.89914900  |
| H | -4.34118000 | 0.65066900  | 3.46850200  |
| H | -4.48722500 | -0.17668500 | 5.80377100  |
| H | -0.84164200 | -2.37534300 | 5.24494200  |
| O | 0.56800200  | 0.09067100  | 1.35318400  |
| C | 6.01633500  | 2.47319600  | 0.25963200  |

|   |             |             |             |
|---|-------------|-------------|-------------|
| H | 6.47078500  | 3.23302000  | 0.90330700  |
| H | 6.37319500  | 1.49763400  | 0.60708100  |
| H | 6.38501800  | 2.63694300  | -0.75654000 |
| C | 0.21060000  | -0.85363500 | -0.75484900 |
| N | -0.50395300 | -1.72673700 | -1.47197200 |
| N | 1.49337600  | -1.10482500 | -1.08587900 |
| N | 0.29420400  | -2.52432100 | -2.25335100 |
| C | -1.93013100 | -1.89634100 | -1.63635200 |
| C | 1.50170400  | -2.12452700 | -1.98960600 |
| C | 2.72734100  | -0.40533500 | -0.71977900 |
| C | -2.57181100 | -2.88714100 | -0.89689500 |
| C | -2.57104900 | -1.12035700 | -2.60161400 |
| C | 2.81030400  | -2.43152900 | -2.63782400 |
| H | 2.44440300  | 0.58503800  | -0.36088800 |
| C | 3.66544900  | -0.28849200 | -1.97548300 |
| C | 3.55759700  | -1.12911200 | 0.31339800  |
| C | -3.93512200 | -3.06424600 | -1.12374600 |
| C | -1.82503200 | -3.68889300 | 0.13043500  |
| C | -3.93678000 | -1.32934900 | -2.78397200 |
| C | -1.82271100 | -0.09159600 | -3.40737200 |
| H | 2.66210700  | -3.03649500 | -3.53157600 |
| H | 3.48302200  | -2.95520900 | -1.94581100 |
| O | 3.33018900  | -1.17577700 | -3.03790800 |
| C | 5.08882400  | -0.54676400 | -1.43712300 |
| H | 3.56929400  | 0.70754100  | -2.41024100 |
| C | 4.89213700  | -1.18076800 | -0.08338300 |
| C | 3.13856800  | -1.63239000 | 1.54043300  |
| C | -4.63363300 | -2.29170400 | -2.05153100 |

|    |             |             |             |
|----|-------------|-------------|-------------|
| H  | -4.46552600 | -3.82082200 | -0.55148000 |
| H  | -1.53079400 | -3.02146800 | 0.94616200  |
| H  | -0.92275600 | -4.13824900 | -0.29549600 |
| H  | -2.45369400 | -4.48649400 | 0.52939300  |
| H  | -4.46529000 | -0.73234700 | -3.52363700 |
| H  | -0.90318100 | -0.50680600 | -3.83110600 |
| H  | -1.54627300 | 0.76655100  | -2.78580900 |
| H  | -2.44235600 | 0.27641500  | -4.22720300 |
| H  | 5.64092800  | -1.17963300 | -2.13876300 |
| H  | 5.63317300  | 0.39911300  | -1.35085800 |
| C  | 5.84572200  | -1.74870500 | 0.75727400  |
| C  | 4.09537500  | -2.20994600 | 2.37246600  |
| H  | 2.09636200  | -1.54185300 | 1.83099500  |
| C  | -6.10964900 | -2.49446700 | -2.27791100 |
| C  | 5.43659300  | -2.26558700 | 1.98522700  |
| H  | 6.88910200  | -1.79414000 | 0.45882700  |
| H  | 3.79779400  | -2.61244900 | 3.33520500  |
| H  | -6.51810300 | -3.23414100 | -1.58682500 |
| H  | -6.65673100 | -1.55807600 | -2.13739500 |
| H  | -6.30475800 | -2.83813400 | -3.29823800 |
| H  | 6.16822400  | -2.71612100 | 2.64844000  |
| Si | -3.02576500 | 3.37907500  | -0.81626600 |
| H  | -2.65659800 | 0.88311100  | -0.76745800 |
| C  | -4.78270900 | 3.15714100  | -1.46614500 |
| H  | -5.46306000 | 2.87134300  | -0.65863200 |
| H  | -5.15990100 | 4.07874400  | -1.92051000 |
| H  | -4.81499300 | 2.36711800  | -2.22372600 |
| C  | -1.93193000 | 3.87117100  | -2.27385300 |



|   |             |            |             |
|---|-------------|------------|-------------|
| H | -0.89111300 | 4.03929000 | -1.98209200 |
| H | -1.94459900 | 3.09774400 | -3.04912200 |
| H | -2.30417400 | 4.79539900 | -2.72744200 |
| C | -3.01755000 | 4.72542200 | 0.50094400  |
| H | -3.75484100 | 4.50338800 | 1.27858100  |
| H | -2.04262200 | 4.82468800 | 0.98598300  |
| H | -3.27810900 | 5.69401000 | 0.06294800  |

SS-TS4 -240.79

Zero-point correction= 0.810833 (Hartree/Particle)

|    |             |             |             |
|----|-------------|-------------|-------------|
| C  | 0.18189200  | 0.49410600  | -0.65821100 |
| C  | 2.68566900  | 1.50766000  | -0.77290000 |
| C  | 1.11882300  | 3.25358300  | -0.41661700 |
| C  | 2.23381800  | 2.75090100  | -1.16450400 |
| C  | -0.39794100 | 1.85336300  | -0.66201400 |
| O  | 2.04349600  | 0.89414200  | 0.16668100  |
| Si | 1.30001200  | 3.40173700  | 1.47016100  |
| C  | 3.12204700  | 3.40126800  | 1.95128400  |
| C  | 0.34510500  | 2.20849700  | 2.58453800  |
| C  | 0.60017600  | 5.11676100  | 1.87215900  |
| C  | -1.01584700 | 2.27835100  | -1.99076000 |
| C  | -2.45648100 | 1.83555700  | -2.09538000 |
| C  | -5.13296300 | 0.91231200  | -2.03697200 |
| C  | -3.45584000 | 2.56117000  | -1.43500000 |
| C  | -2.82314300 | 0.65724900  | -2.74966000 |
| C  | -4.14318500 | 0.21194400  | -2.72892900 |
| C  | -4.76854100 | 2.10127800  | -1.39524400 |
| C  | 3.83024000  | 0.84064700  | -1.45262300 |
| C  | 5.99041800  | -0.43605100 | -2.69365900 |

|   |             |             |             |
|---|-------------|-------------|-------------|
| C | 3.77369200  | -0.52367700 | -1.73994400 |
| C | 4.97907000  | 1.56191700  | -1.79244300 |
| C | 6.05342700  | 0.92714700  | -2.41072400 |
| C | 4.84499200  | -1.15840300 | -2.35844300 |
| H | 0.63505900  | 4.13048900  | -0.85509000 |
| H | 2.58656000  | 3.22221400  | -2.07585200 |
| H | -0.99777600 | 2.09844800  | 0.21312800  |
| H | 3.23662500  | 3.39048000  | 3.04031000  |
| H | 3.61300400  | 4.30170200  | 1.56935800  |
| H | 3.64170400  | 2.53422500  | 1.53636600  |
| H | 0.51460600  | 2.51311800  | 3.62368300  |
| H | -0.73749500 | 2.23043700  | 2.41804600  |
| H | 0.69932500  | 1.18115300  | 2.47969200  |
| H | 1.12862700  | 5.89909900  | 1.31787500  |
| H | -0.46081600 | 5.18100700  | 1.60547000  |
| H | 0.68790800  | 5.34438100  | 2.93940300  |
| H | -0.97683000 | 3.36720000  | -2.08812700 |
| H | -0.41372300 | 1.84603000  | -2.79351700 |
| H | -3.19267600 | 3.48892400  | -0.93059200 |
| H | -2.05731500 | 0.07972100  | -3.26103600 |
| H | -4.40388200 | -0.71663900 | -3.23134900 |
| H | -5.52704300 | 2.67769400  | -0.87023800 |
| H | 6.82851500  | -0.93196800 | -3.17402400 |
| H | 2.86457400  | -1.05921600 | -1.49251000 |
| H | 5.03029500  | 2.61973100  | -1.54847500 |
| H | 6.94421700  | 1.49418000  | -2.66370800 |
| H | 4.78343000  | -2.22059600 | -2.58207500 |
| O | 0.44384200  | -0.12872300 | -1.70246200 |

|   |             |             |             |
|---|-------------|-------------|-------------|
| C | -6.54512800 | 0.39092400  | -1.96318700 |
| H | -6.82757700 | -0.11731900 | -2.88851400 |
| H | -6.64733400 | -0.33722700 | -1.14997200 |
| H | -7.25877100 | 1.19866300  | -1.78331600 |
| C | -0.09484300 | -0.34966200 | 0.59270900  |
| N | 0.67263800  | -1.21097900 | 1.27495000  |
| N | -1.29571300 | -0.39780900 | 1.21290200  |
| N | 0.00644400  | -1.76067600 | 2.33889100  |
| C | 1.95223400  | -1.81033500 | 0.96062900  |
| C | -1.18371700 | -1.25110900 | 2.27373300  |
| C | -2.64271500 | -0.05705800 | 0.74087000  |
| C | 1.95144500  | -2.84626500 | 0.02667400  |
| C | 3.07977800  | -1.45287100 | 1.70368200  |
| C | -2.38372900 | -1.42279100 | 3.15085100  |
| H | -2.58293200 | 0.78347200  | 0.05313300  |
| C | -3.58306600 | 0.26741500  | 1.94521600  |
| C | -3.27560300 | -1.26131800 | 0.08326600  |
| C | 3.16629200  | -3.48967000 | -0.21935900 |
| C | 0.70633500  | -3.22751100 | -0.72566500 |
| C | 4.26621100  | -2.11711400 | 1.41160700  |
| C | 3.01747000  | -0.39016400 | 2.76178400  |
| H | -2.07383400 | -1.66449200 | 4.16759100  |
| H | -3.02392700 | -2.23010300 | 2.76986200  |
| O | -3.05955900 | -0.18111500 | 3.18802000  |
| C | -4.92572700 | -0.40796500 | 1.58052900  |
| H | -3.68968500 | 1.34638000  | 2.06849400  |
| C | -4.56376300 | -1.46474900 | 0.56514500  |
| C | -2.71078000 | -2.08149200 | -0.88492200 |

|   |             |             |             |
|---|-------------|-------------|-------------|
| C | 4.33380600  | -3.12234100 | 0.44371700  |
| H | 3.19487400  | -4.28891700 | -0.95598200 |
| H | 0.45480500  | -2.43144200 | -1.43558700 |
| H | -0.14452500 | -3.36728400 | -0.04936900 |
| H | 0.86025900  | -4.15857700 | -1.27371300 |
| H | 5.16626100  | -1.83902300 | 1.95427800  |
| H | 2.20414000  | -0.58376200 | 3.46837200  |
| H | 2.83326500  | 0.57608300  | 2.28587200  |
| H | 3.95548900  | -0.34632400 | 3.31811600  |
| H | -5.41113400 | -0.79793800 | 2.47972400  |
| H | -5.59940800 | 0.33210300  | 1.13152100  |
| C | -5.32509600 | -2.52134400 | 0.07091600  |
| C | -3.47067900 | -3.14218000 | -1.37138400 |
| H | -1.71428900 | -1.87387300 | -1.26931000 |
| C | 5.65317900  | -3.76451400 | 0.10802700  |
| C | -4.76808800 | -3.35655500 | -0.89682600 |
| H | -6.33305300 | -2.69657700 | 0.43575400  |
| H | -3.05698200 | -3.80097100 | -2.12772800 |
| H | 6.24270000  | -3.09095800 | -0.52380400 |
| H | 6.23759800  | -3.96853500 | 1.00883700  |
| H | 5.51428900  | -4.70173200 | -0.43550300 |
| H | -5.34857300 | -4.18741300 | -1.28463700 |

RR-M4

Zero-point correction= 0.813956 (Hartree/Particle)

|   |             |             |             |
|---|-------------|-------------|-------------|
| C | 0.06383800  | -0.67489800 | -0.76767100 |
| C | -2.09142900 | -0.51891800 | -1.74395000 |
| C | -0.81250000 | 1.59140800  | -1.53134900 |
| C | -1.77490800 | 0.68161500  | -2.23912800 |

|    |             |             |             |
|----|-------------|-------------|-------------|
| C  | 0.12410800  | 0.86163300  | -0.52865100 |
| O  | -1.41887300 | -1.02643900 | -0.66452200 |
| O  | 0.63432400  | -1.13130600 | -1.81216400 |
| Si | -1.96183600 | 2.84602500  | -0.64187400 |
| C  | -2.64975100 | 4.03844300  | -1.93131800 |
| C  | -1.12992700 | 3.84918800  | 0.71986900  |
| C  | -3.34006900 | 1.84058700  | 0.16289700  |
| C  | 1.58549100  | 1.32072000  | -0.66927300 |
| C  | 1.84940100  | 2.78044900  | -0.39243400 |
| C  | 2.31032500  | 5.52956900  | 0.14647500  |
| C  | 1.76332800  | 3.74196500  | -1.40370000 |
| C  | 2.20521200  | 3.22093500  | 0.88649300  |
| C  | 2.42719300  | 4.56680300  | 1.15336700  |
| C  | 1.98012700  | 5.09224000  | -1.13713700 |
| C  | -3.20783900 | -1.35406000 | -2.23594000 |
| C  | -5.39181700 | -2.87297800 | -3.11658400 |
| C  | -3.42951000 | -1.55128700 | -3.60200900 |
| C  | -4.09520200 | -1.92441000 | -1.31598100 |
| C  | -5.17866900 | -2.67897400 | -1.75268100 |
| C  | -4.51634300 | -2.30378400 | -4.03866900 |
| H  | -0.21487700 | 2.13103700  | -2.27476900 |
| H  | -2.32574300 | 1.06334600  | -3.09387500 |
| H  | -0.21627700 | 1.05471400  | 0.49778500  |
| H  | -3.36828100 | 4.73056800  | -1.48141600 |
| H  | -3.15974500 | 3.50613500  | -2.73975200 |
| H  | -1.84284700 | 4.63329200  | -2.37188600 |
| H  | -1.88903800 | 4.47379300  | 1.20468600  |
| H  | -0.33451300 | 4.49905500  | 0.34525400  |

|   |             |             |             |
|---|-------------|-------------|-------------|
| H | -0.69892000 | 3.19633900  | 1.48587700  |
| H | -3.82316400 | 2.40392500  | 0.96838700  |
| H | -4.09990700 | 1.54231800  | -0.56481200 |
| H | -2.91819500 | 0.92261100  | 0.59079100  |
| H | 2.21984000  | 0.71132300  | -0.00799300 |
| H | 1.88784600  | 1.07549400  | -1.69027300 |
| H | 1.53517500  | 3.43094600  | -2.41967300 |
| H | 2.31681900  | 2.49390100  | 1.68644600  |
| H | 2.69920800  | 4.87852400  | 2.15907200  |
| H | 1.90025600  | 5.81738000  | -1.94311800 |
| H | -6.23538000 | -3.46419000 | -3.45848300 |
| H | -2.73048700 | -1.12677900 | -4.31614600 |
| H | -3.93713700 | -1.74030900 | -0.25721900 |
| H | -5.86370000 | -3.11075700 | -1.02906500 |
| H | -4.67323600 | -2.45613000 | -5.10206700 |
| C | 2.57040100  | 6.98582100  | 0.43671600  |
| H | 3.64303300  | 7.18065400  | 0.53812300  |
| H | 2.19105900  | 7.62250600  | -0.36563300 |
| H | 2.09302200  | 7.29344000  | 1.37099900  |
| C | 0.54315100  | -1.47188000 | 0.51250600  |
| N | -0.01406900 | -1.55255600 | 1.72344500  |
| N | 1.54498300  | -2.38639000 | 0.52314000  |
| N | 0.55392300  | -2.51765400 | 2.49710200  |
| C | -1.16245800 | -0.86507100 | 2.25853400  |
| C | 1.48368400  | -3.01967000 | 1.74232200  |
| C | 2.47155700  | -2.84221700 | -0.57077400 |
| C | -0.98145600 | 0.35504000  | 2.90520000  |
| C | -2.39292400 | -1.52997400 | 2.20252100  |

|   |             |             |             |
|---|-------------|-------------|-------------|
| C | 2.29937200  | -4.22754000 | 2.08512200  |
| H | 1.82230500  | -3.17031100 | -1.37960900 |
| C | 3.38037100  | -3.95885100 | 0.02422800  |
| C | 3.52540600  | -1.84782800 | -1.02671600 |
| C | -2.11939200 | 0.97829000  | 3.42450500  |
| C | 0.38893700  | 0.94055300  | 3.12080400  |
| C | -3.49239500 | -0.87381600 | 2.74615200  |
| C | -2.49144300 | -2.91395200 | 1.62104300  |
| H | 1.65771500  | -4.93322000 | 2.61475400  |
| H | 3.13453700  | -3.96506800 | 2.74526100  |
| O | 2.73247100  | -4.85031300 | 0.90214600  |
| C | 4.61270900  | -3.22738300 | 0.59663300  |
| H | 3.70281200  | -4.56698600 | -0.82411200 |
| C | 4.73531600  | -2.07565400 | -0.36097900 |
| C | 3.46245400  | -0.93227400 | -2.07411900 |
| C | -3.37767000 | 0.38771500  | 3.34008700  |
| H | -2.01075400 | 1.94420200  | 3.91172400  |
| H | 1.06626500  | 0.71899000  | 2.29282200  |
| H | 0.83330700  | 0.52262900  | 4.03039800  |
| H | 0.33617400  | 2.02536700  | 3.23803900  |
| H | -4.46486100 | -1.35895000 | 2.70688700  |
| H | -1.91058800 | -3.61998300 | 2.22282500  |
| H | -2.10135800 | -2.92568000 | 0.59946400  |
| H | -3.52953600 | -3.25178000 | 1.60453700  |
| H | 4.44124700  | -2.86575300 | 1.61689600  |
| H | 5.49342000  | -3.87304000 | 0.62071600  |
| C | 5.87089200  | -1.33698700 | -0.67121100 |
| C | 4.60275700  | -0.19319900 | -2.38477500 |

|   |             |             |             |
|---|-------------|-------------|-------------|
| H | 2.52566200  | -0.80167700 | -2.60091700 |
| C | -4.60167800 | 1.09718700  | 3.85476800  |
| C | 5.79214100  | -0.37946200 | -1.68013600 |
| H | 6.80685800  | -1.52004500 | -0.15198200 |
| H | 4.56432600  | 0.53245400  | -3.19103200 |
| H | -5.15144100 | 1.55067500  | 3.02323000  |
| H | -5.27983100 | 0.40295600  | 4.35722500  |
| H | -4.33676000 | 1.89185900  | 4.55515100  |
| H | 6.66940500  | 0.20597800  | -1.93710700 |

RS-M4

Zero-point correction= 0.813685 (Hartree/Particle)

|   |             |             |             |
|---|-------------|-------------|-------------|
| C | 0.43827200  | 0.30554700  | 0.48293100  |
| C | 0.06525700  | 2.75430200  | 0.35975900  |
| C | -1.51447100 | 1.31664600  | 1.60955700  |
| C | -1.04667400 | 2.65021700  | 1.10641800  |
| C | -1.09490900 | 0.26257100  | 0.57367900  |
| O | 0.84282000  | 1.68568000  | 0.01961300  |
| O | 1.05359200  | -0.09276400 | 1.54071100  |
| C | -1.56556700 | -1.15769700 | 0.89215500  |
| C | -3.06810100 | -1.30858900 | 0.95811600  |
| C | -5.88291700 | -1.62897100 | 1.06375700  |
| C | -3.67709100 | -1.99920000 | 2.00597500  |
| C | -3.89316100 | -0.78288200 | -0.04358900 |
| C | -5.27268700 | -0.94046300 | 0.00976000  |
| C | -5.06127800 | -2.15854100 | 2.05766100  |
| C | 0.59914300  | 4.02358300  | -0.18764500 |
| C | 1.64611700  | 6.41712100  | -1.21720100 |



|   |             |             |             |
|---|-------------|-------------|-------------|
| C | 1.94985200  | 4.11833600  | -0.54246200 |
| C | -0.22430200 | 5.14078300  | -0.37946500 |
| C | 0.29612400  | 6.32764300  | -0.88134000 |
| C | 2.46821200  | 5.30621300  | -1.04926300 |
| H | -1.57077500 | 3.55521400  | 1.39488900  |
| H | -1.52139800 | 0.57608600  | -0.38634100 |
| H | -1.18032300 | -1.83697300 | 0.11847700  |
| H | -1.11028200 | -1.47769200 | 1.83180200  |
| H | -3.05827700 | -2.43039200 | 2.78873600  |
| H | -3.45025900 | -0.24658400 | -0.87911300 |
| H | -5.89166500 | -0.51726200 | -0.77854200 |
| H | -5.50829500 | -2.70197500 | 2.88622100  |
| H | 2.05016400  | 7.34260700  | -1.61461200 |
| H | 2.58609700  | 3.25074600  | -0.40935200 |
| H | -1.28367700 | 5.07088100  | -0.15357200 |
| H | -0.35766000 | 7.18230000  | -1.02449100 |
| H | 3.51971500  | 5.36417100  | -1.31320700 |
| C | -7.38255900 | -1.76849700 | 1.12854300  |
| H | -7.80084000 | -2.00730300 | 0.14687400  |
| H | -7.67695100 | -2.55623200 | 1.82571100  |
| H | -7.84903400 | -0.83639900 | 1.46384200  |
| C | 1.02674500  | -0.43614800 | -0.78187700 |
| N | 0.53407600  | -0.87442600 | -1.94667900 |
| N | 2.34115500  | -0.72043200 | -0.84324700 |
| N | 1.49929800  | -1.43347400 | -2.74682800 |
| C | -0.80984400 | -0.85299600 | -2.46352800 |
| C | 2.58373200  | -1.32675200 | -2.04207900 |
| C | 3.42045400  | -0.54834900 | 0.14024800  |

|   |             |             |             |
|---|-------------|-------------|-------------|
| C | -1.47484000 | -2.08402500 | -2.56229400 |
| C | -1.35585700 | 0.34626000  | -2.92308900 |
| C | 4.00642700  | -1.61959200 | -2.38585500 |
| H | 3.10793500  | 0.25041700  | 0.81242200  |
| C | 4.77752500  | -0.24259200 | -0.59348600 |
| C | 3.67716900  | -1.84019700 | 0.88402300  |
| C | -2.75411800 | -2.07997000 | -3.10610400 |
| C | -0.82105100 | -3.37291300 | -2.13659500 |
| C | -2.64342900 | 0.29022900  | -3.46764500 |
| C | -0.63873900 | 1.66698800  | -2.82680500 |
| H | 4.11742800  | -1.74422300 | -3.46270800 |
| H | 4.35576100  | -2.52780100 | -1.87593600 |
| O | 4.74204600  | -0.47634300 | -1.99637400 |
| C | 5.82781000  | -1.13303000 | 0.11042000  |
| H | 5.01807000  | 0.81741800  | -0.50714900 |
| C | 5.02741300  | -2.17734700 | 0.84697300  |
| C | 2.74248700  | -2.63695400 | 1.53832600  |
| C | -3.35470600 | -0.90262600 | -3.56187700 |
| H | -3.29805300 | -3.01874200 | -3.17557900 |
| H | -0.22387000 | -3.25354700 | -1.22800900 |
| H | -0.14668800 | -3.73287700 | -2.91940800 |
| H | -1.57702600 | -4.13779400 | -1.95224600 |
| H | -3.09434800 | 1.21223000  | -3.82623000 |
| H | -0.81100300 | 2.25030400  | -3.73396200 |
| H | 0.43650000  | 1.55511300  | -2.68098700 |
| H | -1.02085300 | 2.24659200  | -1.97859200 |
| H | 6.51888300  | -1.54772700 | -0.62983800 |
| H | 6.42230700  | -0.53641100 | 0.81022800  |

|    |             |             |             |
|----|-------------|-------------|-------------|
| C  | 5.47130300  | -3.34390000 | 1.46444600  |
| C  | 3.18997100  | -3.80618100 | 2.14851600  |
| H  | 1.70543000  | -2.31563700 | 1.57997100  |
| C  | -4.75038900 | -0.93906400 | -4.12659200 |
| C  | 4.54220800  | -4.15715700 | 2.10943900  |
| H  | 6.52198000  | -3.61753400 | 1.44043600  |
| H  | 2.48424300  | -4.44793300 | 2.66591100  |
| H  | -5.45490600 | -1.31354700 | -3.37771600 |
| H  | -5.07908500 | 0.05313300  | -4.44105600 |
| H  | -4.80553100 | -1.60836800 | -4.98989800 |
| H  | 4.87283900  | -5.07226100 | 2.59053600  |
| H  | -2.61114600 | 1.31526300  | 1.66782900  |
| Si | -0.91256200 | 1.18331000  | 3.44002200  |
| C  | 0.68799200  | 2.12753100  | 3.73098200  |
| H  | 0.56376200  | 3.19506600  | 3.52856200  |
| H  | 1.00815600  | 2.01162100  | 4.77215300  |
| H  | 1.46239200  | 1.72828500  | 3.07303900  |
| C  | -2.28319500 | 2.07776500  | 4.39927200  |
| H  | -3.23317700 | 1.53757400  | 4.32487400  |
| H  | -2.02870400 | 2.16450500  | 5.46071700  |
| H  | -2.44422500 | 3.09074800  | 4.01445800  |
| C  | -0.77400000 | -0.54291200 | 4.18690300  |
| H  | -1.70198400 | -1.11285900 | 4.08354000  |
| H  | 0.04365100  | -1.08862700 | 3.71068200  |
| H  | -0.56073700 | -0.44932300 | 5.25760600  |

SR-M4

Zero-point correction= 0.812937 (Hartree/Particle)

|   |             |             |             |
|---|-------------|-------------|-------------|
| C | -0.28399100 | 0.06977700  | 0.53629800  |
| C | -2.56867000 | 0.88112600  | 1.00756400  |
| C | -1.30115300 | 2.11615300  | -0.61786100 |
| C | -2.41894400 | 2.06135900  | 0.38904500  |
| C | -0.03051700 | 1.54896600  | 0.04692000  |
| O | -1.76174600 | -0.15630200 | 0.66526200  |
| C | 0.50595400  | 2.38958400  | 1.22895800  |
| C | 2.00535400  | 2.25143900  | 1.36701800  |
| C | 4.79637900  | 1.76459800  | 1.37893900  |
| C | 2.85494100  | 2.89938800  | 0.46585800  |
| C | 2.57997900  | 1.38271700  | 2.30198700  |
| C | 3.94920200  | 1.14468500  | 2.30383100  |
| C | 4.22843800  | 2.65381800  | 0.46372200  |
| C | -3.55209000 | 0.54391200  | 2.05786700  |
| C | -5.36394100 | -0.11507100 | 4.08377200  |
| C | -3.22961500 | -0.43715500 | 3.00182000  |
| C | -4.79437800 | 1.18166500  | 2.12932400  |
| C | -5.69291600 | 0.85666600  | 3.14023400  |
| C | -4.13042400 | -0.76012600 | 4.01102000  |
| H | -3.01541300 | 2.92408800  | 0.66818800  |
| H | 0.75732100  | 1.51281500  | -0.71980700 |
| H | 0.24822500  | 3.44092600  | 1.06330600  |
| H | 0.01402200  | 2.06619700  | 2.14860900  |
| H | 2.43236600  | 3.58995000  | -0.26259000 |
| H | 1.92595500  | 0.83612200  | 2.97141200  |
| H | 4.36840800  | 0.43358000  | 3.01260700  |
| H | 4.86662400  | 3.15968100  | -0.25729300 |
| H | -6.06811700 | -0.37128600 | 4.86903800  |

|   |             |             |             |
|---|-------------|-------------|-------------|
| H | -2.25757900 | -0.91629500 | 2.93336300  |
| H | -5.06064400 | 1.91780400  | 1.37652600  |
| H | -6.65671500 | 1.35415100  | 3.18570800  |
| H | -3.86899400 | -1.51531700 | 4.74589600  |
| O | 0.36018100  | -0.33565900 | 1.57219800  |
| C | 6.27673200  | 1.47837800  | 1.39239000  |
| H | 6.75041900  | 1.89745300  | 2.28572200  |
| H | 6.46250500  | 0.39857700  | 1.40217300  |
| H | 6.77470800  | 1.90733100  | 0.51878100  |
| C | 0.05834900  | -0.89254300 | -0.65378800 |
| N | -0.66013500 | -1.73433500 | -1.40010400 |
| N | 1.33381600  | -1.11591600 | -1.02400900 |
| N | 0.11888300  | -2.47650200 | -2.25429800 |
| C | -2.08085900 | -1.96765000 | -1.37543300 |
| C | 1.32689100  | -2.07353300 | -1.99672000 |
| C | 2.60012100  | -0.58706500 | -0.51548900 |
| C | -2.60361300 | -2.71137200 | -0.31393800 |
| C | -2.85470700 | -1.44272100 | -2.40510300 |
| C | 2.63731400  | -2.36252200 | -2.65394700 |
| H | 2.39791400  | 0.34941700  | 0.00351600  |
| C | 3.59611200  | -0.37020000 | -1.70346600 |
| C | 3.31406200  | -1.54678600 | 0.40804600  |
| C | -3.98107200 | -2.89319000 | -0.29008300 |
| C | -1.70231300 | -3.25850900 | 0.75942800  |
| C | -4.23325200 | -1.65730700 | -2.33689800 |
| C | -2.23013700 | -0.69270500 | -3.55201200 |
| H | 2.48127100  | -2.83464400 | -3.62357000 |
| H | 3.25428000  | -3.01783700 | -2.02501300 |

|    |             |             |             |
|----|-------------|-------------|-------------|
| O  | 3.25164200  | -1.10527400 | -2.87531900 |
| C  | 4.97263400  | -0.78470600 | -1.14240500 |
| H  | 3.58072900  | 0.67466400  | -2.02040600 |
| C  | 4.65979500  | -1.64075400 | 0.06008800  |
| C  | 2.78949100  | -2.21150900 | 1.51096400  |
| C  | -4.81017800 | -2.36492800 | -1.28519500 |
| H  | -4.42318400 | -3.44910800 | 0.53307900  |
| H  | -1.18162700 | -2.44511100 | 1.27761500  |
| H  | -0.94588500 | -3.92483600 | 0.33035100  |
| H  | -2.28149800 | -3.82460200 | 1.49110500  |
| H  | -4.86677800 | -1.25172100 | -3.12154500 |
| H  | -1.69151000 | -1.37650400 | -4.21509900 |
| H  | -1.50709500 | 0.05108000  | -3.20116500 |
| H  | -2.99527500 | -0.17758300 | -4.13532100 |
| H  | 5.55320300  | -1.29920100 | -1.91385400 |
| H  | 5.53336500  | 0.10803000  | -0.84274600 |
| C  | 5.52025000  | -2.42415200 | 0.82462000  |
| C  | 3.65434000  | -3.00280300 | 2.26522100  |
| H  | 1.74376600  | -2.06815000 | 1.77124600  |
| C  | -6.30350300 | -2.54414200 | -1.19679000 |
| C  | 5.00601600  | -3.10657500 | 1.92644900  |
| H  | 6.57203900  | -2.50619700 | 0.56538600  |
| H  | 3.27713800  | -3.53621200 | 3.13179600  |
| H  | -6.71516600 | -1.92272400 | -0.39527800 |
| H  | -6.79435600 | -2.26063200 | -2.12999800 |
| H  | -6.56300600 | -3.58216800 | -0.97236500 |
| H  | 5.66398700  | -3.72522700 | 2.52868200  |
| Si | -1.13185300 | 3.73060600  | -1.59084800 |

|   |             |            |             |
|---|-------------|------------|-------------|
| C | -2.75393500 | 3.95919100 | -2.52284500 |
| H | -2.72654800 | 4.85011600 | -3.15747600 |
| H | -2.96031000 | 3.09429100 | -3.16162000 |
| H | -3.59345600 | 4.06673100 | -1.82899700 |
| C | 0.27754100  | 3.51798400 | -2.82626500 |
| H | 0.10663400  | 2.64284100 | -3.46248800 |
| H | 0.36436900  | 4.39247700 | -3.47817700 |
| H | 1.24046000  | 3.38044300 | -2.32375400 |
| C | -0.82785200 | 5.25636300 | -0.52392700 |
| H | 0.20697200  | 5.31895400 | -0.17491300 |
| H | -1.03720400 | 6.16120100 | -1.10356400 |
| H | -1.47971100 | 5.26528700 | 0.35543600  |
| H | -1.56023900 | 1.38934000 | -1.41417500 |

SS-M4

Zero-point correction= 0.814456 (Hartree/Particle)

|    |             |            |             |
|----|-------------|------------|-------------|
| C  | 0.23163800  | 0.60738500 | -0.38730200 |
| C  | 2.41130700  | 1.67781500 | -0.65514700 |
| C  | 0.98695500  | 2.68261900 | 1.01875400  |
| C  | 2.09879800  | 2.79372000 | 0.01654300  |
| C  | -0.20415100 | 1.93802500 | 0.36684600  |
| O  | 1.72530200  | 0.53024400 | -0.37410400 |
| Si | 1.64760100  | 2.00836000 | 2.68648600  |
| C  | 3.29071000  | 1.12095800 | 2.47534000  |
| C  | 0.32470300  | 0.96570300 | 3.55164600  |
| C  | 1.95779300  | 3.51259200 | 3.78526200  |
| C  | -0.91032900 | 2.88419500 | -0.64242700 |
| C  | -2.38607600 | 2.61668500 | -0.80111000 |

|   |             |            |             |
|---|-------------|------------|-------------|
| C | -5.13039100 | 1.93748800 | -0.94724700 |
| C | -3.27723300 | 2.99620900 | 0.20781900  |
| C | -2.89476000 | 1.91678900 | -1.89985000 |
| C | -4.24340800 | 1.58615600 | -1.96953500 |
| C | -4.62644600 | 2.65234700 | 0.14253800  |
| C | 3.47017700  | 1.51828500 | -1.66975100 |
| C | 5.45165100  | 1.17495600 | -3.61408900 |
| C | 3.28187800  | 0.61143200 | -2.71788000 |
| C | 4.66273300  | 2.24471700 | -1.59939200 |
| C | 5.64554900  | 2.07741700 | -2.56993000 |
| C | 4.26630700  | 0.44408700 | -3.68543100 |
| H | 0.62939900  | 3.68667200 | 1.27960200  |
| H | 2.60662900  | 3.73056200 | -0.18355900 |
| H | -0.92460800 | 1.67966600 | 1.15640200  |
| H | 3.61204000  | 0.64871800 | 3.40921100  |
| H | 4.05241200  | 1.85187900 | 2.18585000  |
| H | 3.24621400  | 0.36344300 | 1.68889000  |
| H | 0.68217900  | 0.62741500 | 4.53006600  |
| H | -0.56913800 | 1.57623000 | 3.72292200  |
| H | 0.01023000  | 0.07997400 | 2.99054300  |
| H | 2.65423000  | 4.20532300 | 3.30114700  |
| H | 1.03155100  | 4.05835900 | 3.99090300  |
| H | 2.39544700  | 3.21808800 | 4.74426000  |
| H | -0.78395800 | 3.91097700 | -0.28170400 |
| H | -0.40773800 | 2.79910800 | -1.60713900 |
| H | -2.90333800 | 3.54639700 | 1.06940400  |
| H | -2.20194500 | 1.57817200 | -2.66278300 |
| H | -4.61045300 | 1.00479400 | -2.81314500 |



|   |             |             |             |
|---|-------------|-------------|-------------|
| H | -5.29883300 | 2.94576900  | 0.94563100  |
| H | 6.22206900  | 1.03993400  | -4.36671800 |
| H | 2.34393000  | 0.06683100  | -2.76176300 |
| H | 4.82435200  | 2.92337400  | -0.76668300 |
| H | 6.57055900  | 2.64175700  | -2.50396200 |
| H | 4.10824000  | -0.25595900 | -4.50050400 |
| O | -0.28686400 | 0.43022300  | -1.55443800 |
| C | -6.58403800 | 1.54711700  | -1.03075400 |
| H | -7.08165500 | 2.05494300  | -1.86268400 |
| H | -6.68552800 | 0.46942100  | -1.20075000 |
| H | -7.11941400 | 1.80407800  | -0.11301300 |
| C | -0.07894900 | -0.68224600 | 0.46567700  |
| N | 0.67233500  | -1.73785900 | 0.82117200  |
| N | -1.33056900 | -1.02927400 | 0.82861400  |
| N | -0.06603300 | -2.71996200 | 1.43724900  |
| C | 2.05351700  | -2.04910100 | 0.53627700  |
| C | -1.27609000 | -2.25716800 | 1.42538000  |
| C | -2.63815100 | -0.46305300 | 0.49816100  |
| C | 2.40897000  | -2.30284500 | -0.79328700 |
| C | 2.94327000  | -2.17740600 | 1.59990200  |
| C | -2.54224100 | -2.77116700 | 2.03241400  |
| H | -2.51532100 | 0.59000800  | 0.25424200  |
| C | -3.62169700 | -0.65443500 | 1.69857500  |
| C | -3.29365300 | -1.20250400 | -0.64656100 |
| C | 3.74789400  | -2.57563300 | -1.04984600 |
| C | 1.37821300  | -2.32143500 | -1.88819600 |
| C | 4.27472300  | -2.46344700 | 1.28808600  |
| C | 2.49581300  | -2.04361600 | 3.03048600  |

|   |             |             |             |
|---|-------------|-------------|-------------|
| H | -2.31629400 | -3.48068600 | 2.82828800  |
| H | -3.16797400 | -3.26311100 | 1.27623500  |
| O | -3.18957100 | -1.65491400 | 2.61562200  |
| C | -4.97494000 | -1.00765200 | 1.04451800  |
| H | -3.67813600 | 0.25881400  | 2.29402800  |
| C | -4.61876400 | -1.49764100 | -0.33753600 |
| C | -2.73368400 | -1.51868500 | -1.87924500 |
| C | 4.69811500  | -2.63581400 | -0.02693800 |
| H | 4.05851800  | -2.74565600 | -2.07796400 |
| H | 0.87246400  | -1.35389000 | -1.99025900 |
| H | 0.61026400  | -3.07403000 | -1.67101700 |
| H | 1.84547600  | -2.58275900 | -2.84019900 |
| H | 4.99464100  | -2.54339900 | 2.09861900  |
| H | 1.93244600  | -2.92893600 | 3.33955000  |
| H | 1.84574700  | -1.17654300 | 3.16842100  |
| H | 3.35893400  | -1.93314800 | 3.68970600  |
| H | -5.50688700 | -1.74413800 | 1.65402300  |
| H | -5.60119500 | -0.10998700 | 0.98197600  |
| C | -5.42398300 | -2.13151300 | -1.28010200 |
| C | -3.54303800 | -2.16031800 | -2.81523600 |
| H | -1.70866900 | -1.22365900 | -2.09436300 |
| C | 6.14738400  | -2.88308000 | -0.35454600 |
| C | -4.87517600 | -2.46153400 | -2.51893500 |
| H | -6.45972100 | -2.36919400 | -1.05403700 |
| H | -3.13858200 | -2.42025700 | -3.78813600 |
| H | 6.57922600  | -2.00930300 | -0.85257900 |
| H | 6.73114300  | -3.08230600 | 0.54641700  |
| H | 6.25836500  | -3.73402700 | -1.03218500 |

H -5.49021400 -2.95995800 -3.26158700

*RR-TS5*

Zero-point correction= 0.811918 (Hartree/Particle)

C 0.65139900 -0.43484600 -1.06095100

C -0.51982000 -2.54206900 -0.19656500

C 1.90831800 -2.11831500 -0.07111400

C 0.90899600 -2.99784000 -0.19714400

O 1.61178200 -0.77077600 -0.03309300

C -0.71766700 -1.09255200 -0.75433700

O 1.06448900 -0.32926700 -2.20909000

Si -1.15231700 -2.72488200 1.59285400

C -0.88613500 -4.50469400 2.15093900

C -0.13750700 -1.54897300 2.66497600

C -2.98627000 -2.31537600 1.70282600

C 3.34593700 -2.43620800 -0.04049500

C 6.07260700 -3.05044500 -0.11247000

C 4.24846900 -1.56210500 -0.65195200

C 3.82167800 -3.61007600 0.55451200

C 5.17759900 -3.91619100 0.51554300

C 5.60303500 -1.87436800 -0.69441200

H -1.11056600 -3.23555100 -0.80671900

H 1.13172700 -4.05573500 -0.28852900

H -1.42306500 -5.20521000 1.50356600

H -1.24836000 -4.65050500 3.17321100

H 0.17567400 -4.76795100 2.12995600

H 0.08149500 -0.63071200 2.10971700

H 0.82729700 -1.99872800 2.91992600

|   |             |             |             |
|---|-------------|-------------|-------------|
| H | -0.65279900 | -1.28771300 | 3.59460200  |
| H | -3.56319900 | -2.90815700 | 0.98404100  |
| H | -3.35950100 | -2.53541000 | 2.70910500  |
| H | -3.18952300 | -1.26105600 | 1.49352300  |
| H | 7.13077700  | -3.29083600 | -0.14351600 |
| H | 3.86532800  | -0.65215100 | -1.10376900 |
| H | 3.12403100  | -4.27170200 | 1.06083000  |
| H | 5.53901100  | -4.82675500 | 0.98315300  |
| H | 6.29186600  | -1.19566100 | -1.18950600 |
| C | -1.56863200 | -1.11040000 | -2.03757100 |
| H | -1.22919200 | -0.48093800 | 0.00205200  |
| C | -2.96919500 | -1.63602000 | -1.82408000 |
| C | -3.31715600 | -2.92879900 | -2.22291500 |
| C | -3.95699400 | -0.86763400 | -1.19798800 |
| C | -4.59352200 | -3.43884100 | -1.99446600 |
| H | -2.57529700 | -3.54619500 | -2.72367100 |
| C | -5.23305800 | -1.37150100 | -0.97614100 |
| H | -3.73041500 | 0.13707200  | -0.84868900 |
| C | -5.57491500 | -2.66832700 | -1.36981300 |
| H | -4.83137100 | -4.45081500 | -2.31208000 |
| H | -5.97413300 | -0.75106900 | -0.47802500 |
| H | -1.59621700 | -0.10383900 | -2.47228700 |
| H | -1.04069900 | -1.72625400 | -2.77148200 |
| C | 0.49545000  | 1.44988800  | -0.33459900 |
| N | 1.56174300  | 2.21790100  | -0.05984400 |
| N | -0.51380600 | 2.36026700  | -0.30712400 |
| N | 1.27022200  | 3.55189800  | 0.14368800  |
| C | 2.95795400  | 1.86732600  | -0.04517600 |

|   |             |            |             |
|---|-------------|------------|-------------|
| C | -0.01538100 | 3.59861100 | -0.00464200 |
| C | -1.93957900 | 2.19330300 | -0.51026800 |
| C | 3.54225700  | 1.46380500 | 1.15673600  |
| C | 3.68414300  | 2.04553100 | -1.22188600 |
| C | -0.97536500 | 4.74161900 | -0.01026800 |
| H | -2.07575800 | 1.29431400 | -1.11207400 |
| C | -2.56013500 | 3.41969800 | -1.26342300 |
| C | -2.72164900 | 2.11883500 | 0.78204000  |
| C | 4.91749800  | 1.25194400 | 1.16195000  |
| C | 2.70069500  | 1.23014300 | 2.37916700  |
| C | 5.06239000  | 1.82223800 | -1.16679500 |
| C | 2.98927100  | 2.43195700 | -2.49920400 |
| H | -0.44236700 | 5.68856400 | -0.09148900 |
| H | -1.58160200 | 4.74620700 | 0.90588800  |
| O | -1.77884700 | 4.60299500 | -1.17067500 |
| C | -3.96184900 | 3.59083500 | -0.63504800 |
| H | -2.62017400 | 3.21493500 | -2.33361300 |
| C | -3.87479200 | 2.89687100 | 0.70257500  |
| C | -2.40842200 | 1.39662100 | 1.92730900  |
| C | 5.69338800  | 1.43866100 | 0.01538000  |
| H | 5.39626700  | 0.92811300 | 2.08310200  |
| H | 2.09830600  | 0.32726100 | 2.23628100  |
| H | 2.01740000  | 2.06547100 | 2.55948000  |
| H | 3.32761800  | 1.09649100 | 3.26247900  |
| H | 5.65148500  | 1.95414100 | -2.07115800 |
| H | 2.43435800  | 3.36761600 | -2.37753300 |
| H | 2.27966800  | 1.64617700 | -2.78065200 |
| H | 3.71230600  | 2.56214000 | -3.30627100 |

|   |             |             |             |
|---|-------------|-------------|-------------|
| H | -4.21310700 | 4.65249800  | -0.56287200 |
| H | -4.71853300 | 3.11549400  | -1.26966100 |
| C | -4.75500900 | 2.94424100  | 1.77940200  |
| C | -3.29196700 | 1.44413800  | 3.00403600  |
| H | -1.49184700 | 0.81555800  | 1.98645400  |
| C | 7.18350200  | 1.22001800  | 0.07043200  |
| C | -4.45713800 | 2.20984300  | 2.92678400  |
| H | -5.65493200 | 3.54995000  | 1.73200100  |
| H | -3.07013100 | 0.88446300  | 3.90686900  |
| H | 7.41660000  | 0.26362500  | 0.54784800  |
| H | 7.62231500  | 1.22053800  | -0.93015600 |
| H | 7.67232600  | 2.00728900  | 0.65287400  |
| H | -5.13433500 | 2.24095700  | 3.77413400  |
| C | -6.96675700 | -3.20282700 | -1.14876200 |
| H | -7.64615700 | -2.86321100 | -1.93744100 |
| H | -6.97594800 | -4.29513700 | -1.15212600 |
| H | -7.37473200 | -2.85962200 | -0.19463200 |

RS-TS5

Zero-point correction= 0.812608 (Hartree/Particle)

|   |             |             |             |
|---|-------------|-------------|-------------|
| C | 0.37502900  | -0.98601400 | -0.56545200 |
| C | -1.11913900 | -2.18733000 | 0.98110900  |
| C | 0.94308100  | -1.09335500 | 1.78951100  |
| C | -0.16179500 | -1.80053400 | 2.07079000  |
| O | 1.28660400  | -0.69028800 | 0.52125100  |
| C | -1.06374900 | -1.06049600 | -0.06743100 |
| O | 0.78712000  | -1.74959800 | -1.43620900 |
| C | 1.95521100  | -0.67564800 | 2.78284300  |
| C | 3.89457500  | 0.09113800  | 4.65135900  |

|   |             |             |             |
|---|-------------|-------------|-------------|
| C | 3.30539400  | -0.61716400 | 2.41824500  |
| C | 1.58600900  | -0.33324600 | 4.08865800  |
| C | 2.55111400  | 0.04296200  | 5.01812100  |
| C | 4.26691900  | -0.23829000 | 3.34929900  |
| H | -0.31528500 | -2.13694600 | 3.09076700  |
| H | 4.64626600  | 0.38945000  | 5.37504600  |
| H | 3.58590400  | -0.87092900 | 1.39967000  |
| H | 0.53522800  | -0.34473000 | 4.36397900  |
| H | 2.25242500  | 0.30937200  | 6.02711900  |
| H | 5.31235200  | -0.20223200 | 3.05745900  |
| C | -2.01580600 | -1.19943600 | -1.24900200 |
| H | -1.27075000 | -0.13148300 | 0.47910800  |
| C | -3.48440100 | -1.24640600 | -0.88840700 |
| C | -4.36771800 | -1.99219700 | -1.67583800 |
| C | -4.01994300 | -0.53641500 | 0.19080500  |
| C | -5.73058000 | -2.02100100 | -1.40307900 |
| H | -3.97549800 | -2.55423200 | -2.52018200 |
| C | -5.38606000 | -0.56582300 | 0.46312400  |
| H | -3.36860900 | 0.04112700  | 0.84378700  |
| C | -6.26480300 | -1.30803100 | -0.32634600 |
| H | -6.39233400 | -2.60883200 | -2.03434200 |
| H | -5.77458300 | -0.00514500 | 1.30952200  |
| H | -1.83555800 | -0.35730100 | -1.93556700 |
| H | -1.74634600 | -2.08909000 | -1.82073400 |
| C | 0.47781700  | 0.87099700  | -1.27800000 |
| N | 1.61064200  | 1.27958800  | -1.86235700 |
| N | -0.28087300 | 1.99883500  | -1.30180300 |
| N | 1.61336700  | 2.60468000  | -2.23785100 |

|   |             |             |             |
|---|-------------|-------------|-------------|
| C | 2.83043500  | 0.52924300  | -1.98562900 |
| C | 0.44335600  | 3.01781700  | -1.86464900 |
| C | -1.53813000 | 2.28730600  | -0.62250400 |
| C | 3.80977700  | 0.73806900  | -1.01287900 |
| C | 2.99108100  | -0.34435900 | -3.05889600 |
| C | -0.21382600 | 4.35365900  | -1.98264100 |
| H | -2.14574100 | 1.38050900  | -0.63028700 |
| C | -2.32546700 | 3.44894200  | -1.32934200 |
| C | -1.28173700 | 2.79434500  | 0.77947900  |
| C | 4.98995800  | 0.00528900  | -1.12481900 |
| C | 3.58698800  | 1.72783000  | 0.09862100  |
| C | 4.19121200  | -1.05005300 | -3.13111800 |
| C | 1.89961000  | -0.52014200 | -4.07731900 |
| H | 0.23841200  | 4.93575200  | -2.78541800 |
| H | -0.11819000 | 4.91103400  | -1.03925000 |
| O | -1.56972900 | 4.12825800  | -2.31877900 |
| C | -2.79433100 | 4.38062000  | -0.18315900 |
| H | -3.17292800 | 3.03770600  | -1.87869000 |
| C | -1.99192700 | 3.96584700  | 1.02525700  |
| C | -0.42722100 | 2.24342600  | 1.73098800  |
| C | 5.19238200  | -0.89652700 | -2.17156000 |
| H | 5.76931800  | 0.14553400  | -0.37879800 |
| H | 2.65981000  | 1.49706600  | 0.63427900  |
| H | 3.50649000  | 2.74465100  | -0.29765200 |
| H | 4.40857100  | 1.69566300  | 0.81678800  |
| H | 4.34406100  | -1.74147300 | -3.95609000 |
| H | 1.56279200  | 0.44664600  | -4.46372300 |
| H | 1.04854200  | -1.02175700 | -3.60682600 |



|    |             |             |             |
|----|-------------|-------------|-------------|
| H  | 2.24908200  | -1.12585700 | -4.91540600 |
| H  | -2.63631100 | 5.42605300  | -0.46630600 |
| H  | -3.86749500 | 4.25355700  | -0.00752800 |
| C  | -1.88009800 | 4.59648100  | 2.26198000  |
| C  | -0.31528700 | 2.87860200  | 2.96540500  |
| H  | 0.15959600  | 1.35445300  | 1.50789300  |
| C  | 6.46052600  | -1.70706400 | -2.25065500 |
| C  | -1.04310100 | 4.04203000  | 3.22875900  |
| H  | -2.42525500 | 5.51310700  | 2.46656600  |
| H  | 0.35060300  | 2.46896400  | 3.71853600  |
| H  | 7.30214700  | -1.17135600 | -1.80531400 |
| H  | 6.34647700  | -2.65284000 | -1.71110200 |
| H  | 6.71293800  | -1.94655700 | -3.28621400 |
| H  | -0.94308500 | 4.52925000  | 4.19336300  |
| C  | -7.73798300 | -1.36797600 | -0.01335600 |
| H  | -7.98475300 | -2.28437900 | 0.53260500  |
| H  | -8.04621600 | -0.52140800 | 0.60440100  |
| H  | -8.33704700 | -1.36101600 | -0.92759300 |
| Si | -0.68443400 | -3.99636300 | 0.47243300  |
| H  | -2.14010600 | -2.23496100 | 1.38236700  |
| C  | 1.17212300  | -4.28497600 | 0.51909800  |
| H  | 1.68188200  | -3.56029700 | -0.12118400 |
| H  | 1.55993600  | -4.18641300 | 1.53707200  |
| H  | 1.40360000  | -5.29354600 | 0.16062800  |
| C  | -1.50144100 | -5.05885700 | 1.80497800  |
| H  | -2.59152100 | -4.96249100 | 1.77569000  |
| H  | -1.25383700 | -6.11581700 | 1.66487900  |
| H  | -1.16408000 | -4.76998200 | 2.80575400  |

|   |             |             |             |
|---|-------------|-------------|-------------|
| C | -1.37056200 | -4.52765900 | -1.20091100 |
| H | -0.81272700 | -4.04664700 | -2.00896700 |
| H | -1.26247800 | -5.61238200 | -1.30735300 |
| H | -2.43247800 | -4.28304400 | -1.30544400 |

SR-TS5

Zero-point correction= 0.812137 (Hartree/Particle)

|   |             |             |             |
|---|-------------|-------------|-------------|
| C | -0.03726200 | 0.46190700  | -1.01540400 |
| C | 2.33700900  | 0.90416500  | -0.92154600 |
| C | 0.88976500  | 2.26832000  | 0.59504700  |
| C | 2.21007500  | 1.78529000  | 0.07521200  |
| C | -0.31632900 | 1.76180700  | -0.23155200 |
| O | 1.25561600  | 0.34338100  | -1.54743700 |
| C | -1.02976000 | 2.73777800  | -1.21383100 |
| C | -2.50609300 | 2.39784500  | -1.27807000 |
| C | -5.17785800 | 1.46461500  | -1.16237600 |
| C | -3.32752400 | 2.69475300  | -0.18758600 |
| C | -3.05758000 | 1.66508000  | -2.33229700 |
| C | -4.36622400 | 1.20312100  | -2.27155500 |
| C | -4.64291600 | 2.23408800  | -0.12794200 |
| C | 3.61112100  | 0.41597400  | -1.49756000 |
| C | 5.99702700  | -0.57513100 | -2.59906900 |
| C | 3.59130300  | -0.37184900 | -2.65489500 |
| C | 4.84654900  | 0.70329000  | -0.90385500 |
| C | 6.02632100  | 0.21659000  | -1.45174500 |
| C | 4.77437400  | -0.86457200 | -3.19770300 |
| H | 3.11435700  | 2.17138900  | 0.53369800  |
| H | -1.08007800 | 1.50772900  | 0.50647600  |

|   |             |             |             |
|---|-------------|-------------|-------------|
| H | -0.92120300 | 3.76448700  | -0.85536800 |
| H | -0.57055900 | 2.68992600  | -2.20643900 |
| H | -2.92380200 | 3.26628800  | 0.64642700  |
| H | -2.42892900 | 1.39925500  | -3.17509000 |
| H | -4.76094100 | 0.60355800  | -3.08811400 |
| H | -5.25851700 | 2.47105600  | 0.73719100  |
| H | 6.92033400  | -0.95902700 | -3.02168600 |
| H | 2.63991800  | -0.59995300 | -3.12097300 |
| H | 4.89203100  | 1.28940600  | 0.00797000  |
| H | 6.97385200  | 0.44539000  | -0.97334000 |
| H | 4.73823500  | -1.47602000 | -4.09408500 |
| O | -0.90639900 | -0.05888000 | -1.71282400 |
| C | -6.57971400 | 0.91432800  | -1.09649700 |
| H | -7.16533700 | 1.21693700  | -1.96947600 |
| H | -6.56254400 | -0.18171800 | -1.07971200 |
| H | -7.10243600 | 1.26194900  | -0.20160700 |
| C | 0.04056600  | -0.79765900 | 0.58734600  |
| N | 0.85054600  | -1.61094600 | 1.27517000  |
| N | -1.18773600 | -1.15986300 | 1.04904800  |
| N | 0.20569900  | -2.45142900 | 2.16270800  |
| C | 2.26092000  | -1.78093300 | 1.06800700  |
| C | -1.04262200 | -2.14034000 | 1.99424000  |
| C | -2.53554000 | -0.76057000 | 0.64246100  |
| C | 2.67617200  | -2.49691200 | -0.05610100 |
| C | 3.15355600  | -1.25534600 | 2.00425300  |
| C | -2.27366200 | -2.55229600 | 2.73397800  |
| H | -2.48081800 | 0.18048600  | 0.09544700  |
| C | -3.45920900 | -0.62924200 | 1.89711600  |

|   |             |             |             |
|---|-------------|-------------|-------------|
| C | -3.23150300 | -1.79121500 | -0.22070800 |
| C | 4.04590300  | -2.71427200 | -0.21125100 |
| C | 1.67810000  | -2.99031200 | -1.06999800 |
| C | 4.51050300  | -1.49393500 | 1.80409900  |
| C | 2.65485000  | -0.43471100 | 3.16245000  |
| H | -2.01003900 | -3.01948100 | 3.68274500  |
| H | -2.87539200 | -3.25362800 | 2.14109300  |
| O | -2.98672700 | -1.36058600 | 3.02547000  |
| C | -4.83912300 | -1.13141000 | 1.42392200  |
| H | -3.49723400 | 0.40909700  | 2.23499700  |
| C | -4.54000700 | -1.98703800 | 0.21739000  |
| C | -2.72786700 | -2.45695100 | -1.33193400 |
| C | 4.97198600  | -2.23118800 | 0.71038100  |
| H | 4.39562600  | -3.25897000 | -1.08465800 |
| H | 1.20109700  | -2.14509000 | -1.58003600 |
| H | 0.88802200  | -3.57935400 | -0.59214800 |
| H | 2.17080300  | -3.61432400 | -1.81800800 |
| H | 5.22612400  | -1.09349700 | 2.51872000  |
| H | 1.87298200  | -0.96181100 | 3.71554600  |
| H | 2.22612800  | 0.50679800  | 2.80005200  |
| H | 3.46999800  | -0.19727700 | 3.84831000  |
| H | -5.34357000 | -1.66753400 | 2.23300600  |
| H | -5.46841700 | -0.27856900 | 1.14350200  |
| C | -5.37747600 | -2.86895800 | -0.45986800 |
| C | -3.56698300 | -3.34579700 | -2.00194200 |
| H | -1.71682900 | -2.25392700 | -1.67135200 |
| C | 6.44332700  | -2.50568700 | 0.53945700  |
| C | -4.87977400 | -3.54900400 | -1.57067700 |

|    |             |             |             |
|----|-------------|-------------|-------------|
| H  | -6.39785100 | -3.03137900 | -0.12396100 |
| H  | -3.19944600 | -3.88062300 | -2.87175100 |
| H  | 7.04402900  | -1.66868000 | 0.90501500  |
| H  | 6.73995600  | -3.39751500 | 1.10160300  |
| H  | 6.69036000  | -2.66917400 | -0.51193100 |
| H  | -5.51881300 | -4.24498800 | -2.10500600 |
| Si | 1.01699000  | 4.13539900  | 0.98476300  |
| C  | 2.33560600  | 4.28864700  | 2.32602700  |
| H  | 2.39562700  | 5.32264900  | 2.68000100  |
| H  | 2.10008400  | 3.65557400  | 3.18778100  |
| H  | 3.32931300  | 4.00910500  | 1.96406200  |
| C  | -0.60426100 | 4.78725800  | 1.70105600  |
| H  | -1.04649600 | 4.05784800  | 2.38852400  |
| H  | -0.41850600 | 5.70403200  | 2.26951900  |
| H  | -1.34623100 | 5.02223200  | 0.93314100  |
| C  | 1.56518500  | 5.13332500  | -0.51425000 |
| H  | 0.80103600  | 5.18094500  | -1.29417000 |
| H  | 1.81003300  | 6.15845000  | -0.21908500 |
| H  | 2.46262300  | 4.68670100  | -0.95364900 |
| H  | 0.76849500  | 1.84290600  | 1.60660200  |

SS-TS5

Zero-point correction= 0.812805 (Hartree/Particle)

|   |             |             |             |
|---|-------------|-------------|-------------|
| C | -0.26714500 | -0.93761400 | -0.39369300 |
| C | -2.46271200 | -1.83684400 | -0.41126400 |
| C | -1.08664700 | -2.51087600 | 1.46699500  |
| C | -2.19383500 | -2.78782200 | 0.49193100  |
| C | 0.14854900  | -1.94451300 | 0.72173200  |

|    |             |             |             |
|----|-------------|-------------|-------------|
| O  | -1.69343700 | -0.69461700 | -0.40175100 |
| Si | -1.76719100 | -1.47768700 | 2.93724700  |
| C  | -3.29694700 | -0.50228100 | 2.45248000  |
| C  | -0.39766700 | -0.39728100 | 3.66227800  |
| C  | -2.27384000 | -2.72636200 | 4.25976100  |
| C  | 0.96617600  | -3.09905800 | 0.08087200  |
| C  | 2.42889900  | -2.78142400 | -0.11493700 |
| C  | 5.15797200  | -2.07906200 | -0.38814800 |
| C  | 3.30072100  | -2.83666400 | 0.97718100  |
| C  | 2.94635300  | -2.37843800 | -1.34997800 |
| C  | 4.28721500  | -2.03523300 | -1.48107500 |
| C  | 4.64207900  | -2.48156600 | 0.84625500  |
| C  | -3.53089600 | -1.83059700 | -1.42579100 |
| C  | -5.53884500 | -1.78182900 | -3.37294000 |
| C  | -3.33363600 | -1.14191400 | -2.62749000 |
| C  | -4.74648100 | -2.48596100 | -1.20449300 |
| C  | -5.74179000 | -2.46626400 | -2.17586800 |
| C  | -4.33184800 | -1.12084000 | -3.59531700 |
| H  | -0.77317200 | -3.44899200 | 1.94074200  |
| H  | -2.75959700 | -3.71257100 | 0.51364100  |
| H  | 0.79773400  | -1.43130100 | 1.44109600  |
| H  | -3.59936800 | 0.18343600  | 3.25097500  |
| H  | -4.12552400 | -1.19331100 | 2.26752400  |
| H  | -3.13640100 | 0.07301300  | 1.53744000  |
| H  | -0.75612900 | 0.13524400  | 4.54949200  |
| H  | 0.45023500  | -1.01880900 | 3.97147900  |
| H  | -0.02108700 | 0.34583500  | 2.95220500  |
| H  | -3.00168900 | -3.43939400 | 3.85822700  |

|   |             |             |             |
|---|-------------|-------------|-------------|
| H | -1.41385500 | -3.29569000 | 4.62621400  |
| H | -2.73696800 | -2.22710800 | 5.11653700  |
| H | 0.89485700  | -3.96425700 | 0.74871300  |
| H | 0.50418300  | -3.37704500 | -0.86940600 |
| H | 2.92008700  | -3.15009500 | 1.94752500  |
| H | 2.27324700  | -2.29196700 | -2.19611500 |
| H | 4.66134900  | -1.69306700 | -2.44392000 |
| H | 5.30024100  | -2.52813400 | 1.71097900  |
| H | -6.31963400 | -1.76035700 | -4.12651900 |
| H | -2.38251800 | -0.64430700 | -2.78733900 |
| H | -4.91630800 | -2.98989000 | -0.25735100 |
| H | -6.68392200 | -2.97327800 | -1.99270900 |
| H | -4.16729800 | -0.58960500 | -4.52798600 |
| O | 0.28808900  | -0.96182500 | -1.49491000 |
| C | 6.61026700  | -1.71141500 | -0.55477800 |
| H | 7.13149800  | -2.44608000 | -1.17639800 |
| H | 6.70963500  | -0.73861800 | -1.04831100 |
| H | 7.12394700  | -1.66561200 | 0.40909600  |
| C | 0.11751700  | 0.88425400  | 0.36561700  |
| N | -0.58734500 | 2.02347500  | 0.49753800  |
| N | 1.38405900  | 1.30269900  | 0.60771300  |
| N | 0.17460100  | 3.12182200  | 0.83921900  |
| C | -1.97852800 | 2.24656800  | 0.20786200  |
| C | 1.37604500  | 2.64167500  | 0.89553000  |
| C | 2.66165100  | 0.62642500  | 0.41263200  |
| C | -2.40464600 | 2.14596700  | -1.12255300 |
| C | -2.83205300 | 2.60941200  | 1.24814000  |
| C | 2.67087000  | 3.25225900  | 1.32348400  |

|   |             |             |             |
|---|-------------|-------------|-------------|
| H | 2.49928400  | -0.45061200 | 0.46723600  |
| C | 3.69813000  | 1.09483700  | 1.49095400  |
| C | 3.30002100  | 1.00193800  | -0.90653600 |
| C | -3.75847100 | 2.33603800  | -1.37737200 |
| C | -1.42227800 | 1.85720500  | -2.22577200 |
| C | -4.17914400 | 2.80844700  | 0.93811300  |
| C | -2.32422300 | 2.76814500  | 2.65564300  |
| H | 2.49201300  | 4.14473700  | 1.92301700  |
| H | 3.28770700  | 3.51939300  | 0.45472200  |
| O | 3.31143700  | 2.29518300  | 2.15002500  |
| C | 5.03046400  | 1.25683800  | 0.72573900  |
| H | 3.77409300  | 0.35492500  | 2.28990600  |
| C | 4.63685500  | 1.34635100  | -0.72753600 |
| C | 2.70953900  | 0.97963600  | -2.16509600 |
| C | -4.66126900 | 2.65536100  | -0.35939800 |
| H | -4.11955000 | 2.23072100  | -2.39782600 |
| H | -0.86906800 | 0.94577900  | -1.98944300 |
| H | -0.70243500 | 2.67820000  | -2.32285500 |
| H | -1.93714400 | 1.73420400  | -3.18046500 |
| H | -4.86663900 | 3.07251800  | 1.73785500  |
| H | -1.68555400 | 3.65161900  | 2.74210400  |
| H | -1.72548600 | 1.90290200  | 2.95550000  |
| H | -3.15762600 | 2.86891300  | 3.35376400  |
| H | 5.56819300  | 2.13676700  | 1.09193600  |
| H | 5.66860400  | 0.38285600  | 0.89821200  |
| C | 5.42112500  | 1.67906200  | -1.82911200 |
| C | 3.49748300  | 1.31719800  | -3.26391500 |
| H | 1.67379900  | 0.66750100  | -2.27681700 |



|   |             |            |             |
|---|-------------|------------|-------------|
| C | -6.12585700 | 2.81981100 | -0.67251200 |
| C | 4.84155100  | 1.66164100 | -3.09711300 |
| H | 6.46520600  | 1.95236100 | -1.70341600 |
| H | 3.06620000  | 1.30587700 | -4.25967100 |
| H | -6.56242300 | 1.86306700 | -0.97552500 |
| H | -6.67942600 | 3.18608500 | 0.19445900  |
| H | -6.27514700 | 3.52272700 | -1.49694300 |
| H | 5.44027600  | 1.92186000 | -3.96431900 |

*RR-P*

Zero-point correction= 0.426529 (Hartree/Particle)

|   |             |             |             |
|---|-------------|-------------|-------------|
| C | -1.71710100 | 0.49710500  | -0.97760700 |
| C | -0.78663300 | 1.66574900  | -0.89104100 |
| C | 0.57390500  | 1.18404500  | -0.36084000 |
| C | 0.36652500  | 0.37204800  | 0.90024100  |
| C | -1.59363700 | -0.54687400 | -0.15016600 |
| H | -2.53072700 | 0.50315600  | -1.69372800 |
| C | -2.43550400 | -1.75765800 | -0.11532600 |
| C | -3.18279700 | -2.14254600 | -1.23554200 |
| C | -2.50079000 | -2.53772800 | 1.04479500  |
| C | -3.99688700 | -3.26696100 | -1.18694500 |
| H | -3.10863500 | -1.57262500 | -2.15626400 |
| C | -3.31359700 | -3.66637200 | 1.08694700  |
| H | -1.91540300 | -2.25104500 | 1.91071800  |
| C | -4.06708700 | -4.03304500 | -0.02444400 |
| H | -4.56749500 | -3.55461500 | -2.06400000 |
| H | -3.35791600 | -4.26014700 | 1.99419400  |
| H | -4.69876200 | -4.91458300 | 0.01016100  |

|    |             |             |             |
|----|-------------|-------------|-------------|
| O  | 1.02795700  | 0.45157300  | 1.89812800  |
| O  | -0.63095700 | -0.56111000 | 0.85485500  |
| H  | -0.63865200 | 2.09704200  | -1.89054300 |
| Si | -1.58681900 | 3.04772400  | 0.17306700  |
| C  | -3.22224000 | 3.50428300  | -0.63557300 |
| H  | -3.08056300 | 3.81335000  | -1.67579900 |
| H  | -3.91457300 | 2.65726900  | -0.62321500 |
| H  | -3.69872100 | 4.33245300  | -0.10252900 |
| C  | -0.42885100 | 4.53101100  | 0.19623500  |
| H  | 0.51541500  | 4.29614500  | 0.69636400  |
| H  | -0.20146900 | 4.87236000  | -0.81831900 |
| H  | -0.88816400 | 5.36554500  | 0.73479500  |
| C  | -1.87941500 | 2.40749300  | 1.91618800  |
| H  | -2.45561900 | 3.14031900  | 2.48955000  |
| H  | -2.44771900 | 1.47185800  | 1.90213400  |
| H  | -0.94185100 | 2.22649600  | 2.44952000  |
| H  | 1.21778400  | 2.02055500  | -0.07273100 |
| C  | 1.32979400  | 0.32179500  | -1.40426500 |
| H  | 1.47755600  | 0.95045600  | -2.28914000 |
| H  | 0.68744600  | -0.51259800 | -1.70527400 |
| C  | 2.65608800  | -0.19405300 | -0.90721200 |
| C  | 3.82172700  | 0.55619000  | -1.06598900 |
| C  | 2.74155200  | -1.41768800 | -0.23832400 |
| C  | 5.03929500  | 0.09513700  | -0.57467800 |
| H  | 3.77531500  | 1.51273400  | -1.58151000 |
| C  | 3.95828800  | -1.87627600 | 0.25321400  |
| H  | 1.84173200  | -2.01269600 | -0.09610900 |
| C  | 5.12797900  | -1.12934400 | 0.09017000  |

|   |            |             |             |
|---|------------|-------------|-------------|
| H | 5.93587800 | 0.69455100  | -0.70965900 |
| H | 4.00268900 | -2.82944300 | 0.77362400  |
| C | 6.45023000 | -1.64666100 | 0.59624000  |
| H | 6.89332600 | -2.35095700 | -0.11562400 |
| H | 7.16324400 | -0.83230300 | 0.74364600  |
| H | 6.33027800 | -2.17301600 | 1.54646600  |

**RS-P**

Zero-point correction= 0.426771 (Hartree/Particle)

|    |             |             |             |
|----|-------------|-------------|-------------|
| C  | -0.14332500 | -0.23223600 | 0.90734400  |
| C  | 0.50004900  | 1.32892600  | -0.93111300 |
| C  | 1.98702200  | -0.48724400 | -0.16953000 |
| C  | 1.73806700  | 0.49378900  | -1.04372000 |
| O  | 1.11924400  | -0.74611000 | 0.88698500  |
| C  | -0.61886700 | 0.42898500  | -0.37223900 |
| O  | -0.78394900 | -0.34519000 | 1.91739000  |
| Si | 0.91986700  | 2.91937200  | 0.06545700  |
| C  | 1.15282800  | 2.48106500  | 1.87879600  |
| C  | -0.42000600 | 4.22777600  | -0.14018900 |
| C  | 2.52870300  | 3.58453700  | -0.65082200 |
| C  | 3.15400600  | -1.38936500 | -0.15315200 |
| C  | 5.34685200  | -3.13259200 | -0.15754300 |
| C  | 3.08608100  | -2.61629800 | 0.51592100  |
| C  | 4.34177000  | -1.03684200 | -0.80616700 |
| C  | 5.42608800  | -1.90496400 | -0.81324800 |
| C  | 4.17592700  | -3.48137100 | 0.50932400  |
| H  | 0.19367200  | 1.66354000  | -1.93043000 |
| H  | 2.44381400  | 0.67382200  | -1.84617300 |

|   |             |             |             |
|---|-------------|-------------|-------------|
| H | 1.51447100  | 3.35587800  | 2.42810300  |
| H | 1.88881800  | 1.67987400  | 2.00162900  |
| H | 0.22023900  | 2.15181000  | 2.34654700  |
| H | -0.65207200 | 4.39270800  | -1.19715800 |
| H | -1.34741000 | 3.96128100  | 0.37253900  |
| H | -0.07093400 | 5.17910700  | 0.27423500  |
| H | 2.79006100  | 4.53976300  | -0.18559300 |
| H | 2.44599700  | 3.75097500  | -1.72976700 |
| H | 3.35410500  | 2.88794600  | -0.47649900 |
| H | 6.19667000  | -3.80721000 | -0.15897000 |
| H | 2.17632200  | -2.88622900 | 1.03988400  |
| H | 4.42567800  | -0.06960900 | -1.29189500 |
| H | 6.34096200  | -1.61661300 | -1.32063200 |
| H | 4.10816600  | -4.43145700 | 1.02925900  |
| C | -1.96936900 | 1.12621400  | -0.16084600 |
| H | -2.09187000 | 1.86544500  | -0.96134600 |
| H | -1.94814500 | 1.67240600  | 0.78830300  |
| C | -3.14326100 | 0.17377800  | -0.18135900 |
| C | -3.73521600 | -0.29062300 | 0.99435900  |
| C | -3.65159000 | -0.27902300 | -1.40115500 |
| C | -4.80524900 | -1.17866100 | 0.94715900  |
| H | -3.33617000 | 0.03333400  | 1.95011800  |
| C | -4.71879600 | -1.17032600 | -1.44595200 |
| H | -3.20577600 | 0.07273500  | -2.32942700 |
| C | -5.31655000 | -1.63184100 | -0.27122300 |
| H | -5.25022200 | -1.53054100 | 1.87450200  |
| H | -5.09708800 | -1.51012900 | -2.40670600 |
| H | -0.75532300 | -0.39731600 | -1.08759800 |

|   |             |             |             |
|---|-------------|-------------|-------------|
| C | -6.49562200 | -2.57010900 | -0.31467000 |
| H | -7.43847000 | -2.01649900 | -0.25346500 |
| H | -6.51023900 | -3.14530900 | -1.24343300 |
| H | -6.47300400 | -3.27196800 | 0.52272400  |

SR-P

Zero-point correction= 0.427577 (Hartree/Particle)

|   |             |             |             |
|---|-------------|-------------|-------------|
| C | 1.60984400  | 0.62982700  | 1.08898400  |
| C | 0.11841700  | 0.47422600  | 1.18909800  |
| C | -0.13080600 | -1.04996900 | 1.16720000  |
| C | 0.45243700  | -1.64201500 | -0.09779800 |
| C | 2.31948800  | -0.18459100 | 0.30027900  |
| H | 2.12102200  | 1.41213500  | 1.63736300  |
| C | 3.77413800  | -0.15161500 | 0.06073800  |
| C | 4.51563500  | 1.00821000  | 0.31906400  |
| C | 4.43467900  | -1.28424700 | -0.42773600 |
| C | 5.89026800  | 1.02420400  | 0.12013200  |
| H | 4.01219900  | 1.90860100  | 0.65736200  |
| C | 5.81118300  | -1.26241400 | -0.62959900 |
| H | 3.86289800  | -2.17825100 | -0.64884100 |
| C | 6.54457500  | -0.11223800 | -0.35274400 |
| H | 6.45105600  | 1.93103400  | 0.32182900  |
| H | 6.31105600  | -2.14901200 | -1.00596700 |
| H | 7.61753200  | -0.09634400 | -0.51323500 |
| O | -0.04321800 | -2.49641700 | -0.78363400 |
| O | 1.69436300  | -1.19052600 | -0.43355500 |
| H | 0.53677200  | -1.45635500 | 1.94574500  |
| C | -1.52114600 | -1.59664400 | 1.51844500  |

|    |             |             |             |
|----|-------------|-------------|-------------|
| H  | -1.66150000 | -1.42100500 | 2.59004800  |
| H  | -1.47441600 | -2.68295800 | 1.38405600  |
| C  | -2.73972800 | -1.06783400 | 0.79761800  |
| C  | -3.73727000 | -0.40807200 | 1.51903900  |
| C  | -2.96310400 | -1.30638900 | -0.56396800 |
| C  | -4.91538900 | 0.00963700  | 0.90636400  |
| H  | -3.59485100 | -0.22869000 | 2.58208400  |
| C  | -4.13488700 | -0.87423900 | -1.17708100 |
| H  | -2.22305700 | -1.85928400 | -1.13354600 |
| C  | -5.13112400 | -0.20914200 | -0.45495000 |
| H  | -5.67740600 | 0.51550500  | 1.49371700  |
| H  | -4.28812200 | -1.07247600 | -2.23500500 |
| H  | -0.23175200 | 0.86554800  | 2.15233700  |
| Si | -0.56697800 | 1.65929800  | -0.18348000 |
| C  | 0.50175400  | 3.21295800  | -0.05322000 |
| H  | 0.50592300  | 3.61381900  | 0.96627400  |
| H  | 1.53728000  | 3.02282900  | -0.34857900 |
| H  | 0.10147400  | 3.99141400  | -0.71041400 |
| C  | -2.34589600 | 2.21864800  | 0.04963800  |
| H  | -3.05990300 | 1.49977700  | -0.35580300 |
| H  | -2.59059200 | 2.38106100  | 1.10337100  |
| H  | -2.47901600 | 3.17047000  | -0.47602500 |
| C  | -0.31790400 | 0.89682600  | -1.88470100 |
| H  | -0.63120100 | 1.61870100  | -2.64611600 |
| H  | 0.73225700  | 0.65040300  | -2.06698500 |
| H  | -0.91172000 | -0.01098300 | -2.02147000 |
| C  | -6.38612200 | 0.27690000  | -1.13307700 |
| H  | -6.68058800 | -0.39083100 | -1.94633600 |

|   |             |            |             |
|---|-------------|------------|-------------|
| H | -7.21676800 | 0.34557300 | -0.42677900 |
| H | -6.23430200 | 1.27251700 | -1.56319700 |

**SS-P**

Zero-point correction= 0.426759 (Hartree/Particle)

|    |             |             |             |
|----|-------------|-------------|-------------|
| C  | 1.36575200  | 0.53070200  | -0.49632800 |
| C  | -0.06773600 | 0.70947600  | -0.09099800 |
| C  | -0.29030200 | 0.04854900  | 1.28447500  |
| C  | 0.39814000  | -1.30173800 | 1.39429700  |
| C  | 2.15599700  | -0.40349400 | 0.04046400  |
| H  | 1.79488400  | 1.17025000  | -1.25952100 |
| H  | -0.72485200 | 0.23929600  | -0.83912100 |
| Si | -0.50295800 | 2.57914500  | -0.09167700 |
| C  | 0.29684200  | 3.36201200  | -1.60804400 |
| H  | -0.08563500 | 4.37793400  | -1.74580100 |
| H  | 1.38435600  | 3.42996500  | -1.51163700 |
| H  | 0.07098800  | 2.79697300  | -2.51811800 |
| C  | -2.35897500 | 2.87319800  | -0.19269400 |
| H  | -2.85894400 | 2.70281200  | 0.76399700  |
| H  | -2.54591200 | 3.91199300  | -0.48356900 |
| H  | -2.83045200 | 2.22189000  | -0.93450800 |
| C  | 0.20542500  | 3.35332600  | 1.47136100  |
| H  | 0.11716500  | 4.44318100  | 1.43098900  |
| H  | -0.31851400 | 3.01298500  | 2.37031900  |
| H  | 1.26640900  | 3.10703600  | 1.58406800  |
| C  | 3.59069100  | -0.60555200 | -0.24007800 |
| C  | 4.37990000  | 0.44958000  | -0.71426300 |
| C  | 4.18055900  | -1.85863900 | -0.03987800 |

|   |             |             |             |
|---|-------------|-------------|-------------|
| C | 5.72214100  | 0.24752300  | -1.01028900 |
| H | 3.94576500  | 1.43796800  | -0.82862000 |
| C | 5.52695000  | -2.05461500 | -0.33071400 |
| H | 3.57735100  | -2.67531000 | 0.33967400  |
| C | 6.30078300  | -1.00627500 | -0.82098700 |
| H | 6.32215700  | 1.07498400  | -1.37476500 |
| H | 5.97167900  | -3.03204000 | -0.17439000 |
| H | 7.35098900  | -1.16123500 | -1.04549100 |
| O | -0.05219600 | -2.27077800 | 1.94568300  |
| O | 1.66107800  | -1.37697300 | 0.89755600  |
| H | 0.25880800  | 0.65595700  | 2.02242600  |
| C | -1.74976000 | -0.03514100 | 1.75574200  |
| H | -2.06456800 | 0.96554100  | 2.07143000  |
| H | -1.76988400 | -0.66469300 | 2.65152400  |
| C | -2.76064000 | -0.56122700 | 0.75625500  |
| C | -4.03133600 | 0.01350500  | 0.69510100  |
| C | -2.49478300 | -1.63975200 | -0.09570400 |
| C | -4.99957700 | -0.45851700 | -0.18750700 |
| H | -4.27004700 | 0.84827700  | 1.34950000  |
| C | -3.45970000 | -2.10555800 | -0.98153000 |
| H | -1.52916200 | -2.13346100 | -0.06476200 |
| C | -4.72963700 | -1.52510800 | -1.04420000 |
| H | -5.97827100 | 0.01347800  | -0.21272000 |
| H | -3.22358100 | -2.94132300 | -1.63551300 |
| C | -5.77327900 | -2.05463800 | -1.99391600 |
| H | -5.35395400 | -2.21895800 | -2.99025800 |
| H | -6.16885500 | -3.01369100 | -1.64445900 |
| H | -6.61228300 | -1.36151600 | -2.08650600 |



R1H

Zero-point correction= 0.144874 (Hartree/Particle)

|   |             |             |             |
|---|-------------|-------------|-------------|
| C | -3.20179100 | 0.05976500  | 0.00000600  |
| C | -2.58104400 | -1.18606700 | 0.00000100  |
| C | -1.19275300 | -1.26847800 | -0.00000400 |
| C | -0.40395300 | -0.11065100 | -0.00000500 |
| C | -1.04303000 | 1.13858800  | 0.00000000  |
| C | -2.42821400 | 1.22145400  | 0.00000500  |
| H | -4.28466300 | 0.12873000  | 0.00001000  |
| H | -3.17683300 | -2.09268800 | 0.00000100  |
| H | -0.70566300 | -2.23955800 | -0.00000800 |
| H | -0.45347400 | 2.04975700  | 0.00000000  |
| H | -2.90966100 | 2.19378200  | 0.00000900  |
| C | 1.05330500  | -0.25583700 | -0.00001000 |
| H | 1.43422200  | -1.27704700 | -0.00001500 |
| C | 1.97330600  | 0.72173100  | -0.00000900 |
| H | 1.71252100  | 1.77576900  | -0.00000400 |
| C | 3.41002700  | 0.38271600  | -0.00001400 |
| O | 3.84566200  | -0.75055800 | 0.00001800  |
| H | 4.10313700  | 1.24639800  | 0.00003900  |

R1Cl

Zero-point correction= 0.135210 (Hartree/Particle)

|   |             |            |            |
|---|-------------|------------|------------|
| C | -0.24891500 | 1.30338000 | 0.00005600 |
|---|-------------|------------|------------|

|    |             |             |             |
|----|-------------|-------------|-------------|
| C  | -1.52334200 | -1.17150500 | -0.00029000 |
| C  | -1.63757900 | 1.25215000  | 0.00011900  |
| C  | 0.52251600  | 0.13452400  | -0.00017900 |
| C  | -0.13873000 | -1.10282100 | -0.00034100 |
| C  | -2.26167100 | 0.01051100  | -0.00010600 |
| C  | 1.98136000  | 0.25563700  | -0.00018800 |
| C  | 2.88330600  | -0.73788600 | 0.00042300  |
| C  | 4.32651200  | -0.42143100 | 0.00032700  |
| O  | 4.77700700  | 0.70548400  | -0.00029500 |
| H  | 5.00650700  | -1.29493000 | 0.00088200  |
| H  | 0.24863200  | 2.26865400  | 0.00020100  |
| H  | -2.03367900 | -2.12773400 | -0.00039800 |
| H  | -2.23055000 | 2.15932800  | 0.00035000  |
| H  | 0.43128700  | -2.02588400 | -0.00057300 |
| H  | 2.37904900  | 1.27020500  | -0.00065100 |
| H  | 2.60548200  | -1.78762700 | 0.00105000  |
| Cl | -4.00256000 | -0.07301400 | 0.00015100  |

*Si-TS1H*

Zero-point correction= 0.530798 (Hartree/Particle)

|   |             |             |             |
|---|-------------|-------------|-------------|
| C | -3.87674400 | -3.84395900 | 0.61762600  |
| C | -2.72751500 | -3.37624200 | -0.00892400 |
| C | -2.79580700 | -2.33016000 | -0.93882200 |
| C | -4.05035400 | -1.78736900 | -1.24104200 |
| C | -5.20041300 | -2.24993400 | -0.61052700 |
| C | -5.11747100 | -3.27817700 | 0.32493400  |
| H | -3.80662100 | -4.65731300 | 1.33336500  |
| H | -1.76699900 | -3.83105900 | 0.21549000  |

|   |             |             |             |
|---|-------------|-------------|-------------|
| H | -4.11331300 | -0.97185500 | -1.95690900 |
| H | -6.16161000 | -1.80411700 | -0.84643400 |
| C | -1.59776900 | -1.72436600 | -1.53848200 |
| H | -1.73746300 | -1.13188300 | -2.44240500 |
| C | -0.37188300 | -1.73672400 | -1.01055000 |
| C | 0.75000000  | -0.94324900 | -1.62090200 |
| H | -0.14063500 | -2.27338700 | -0.09096300 |
| O | 0.55392800  | -0.22109600 | -2.62916400 |
| H | 1.73661500  | -1.43530900 | -1.48065600 |
| C | -2.18769900 | -0.00307300 | 1.19350200  |
| C | -4.43107300 | 1.67815100  | 0.95061700  |
| C | -3.35397000 | -0.27170600 | 1.90861500  |
| C | -2.16525500 | 1.09830300  | 0.35048200  |
| C | -3.26725200 | 1.94786300  | 0.24196000  |
| C | -4.46910100 | 0.55545500  | 1.77872100  |
| C | -2.95897400 | 3.09555200  | -0.69478700 |
| C | -1.42972400 | 3.06749400  | -0.77552000 |
| C | -1.08178300 | 1.57361600  | -0.59336900 |
| N | 0.28993500  | 1.44158500  | -0.11766800 |
| C | 1.04881500  | 2.49124100  | 0.32566300  |
| C | 0.46408800  | 3.87113800  | 0.38670800  |
| O | -0.94239000 | 3.80527500  | 0.33925900  |
| N | 2.26914300  | 2.11451500  | 0.56805100  |
| N | 2.24795700  | 0.77495400  | 0.24666700  |
| C | 1.06489300  | 0.33089600  | -0.18479000 |
| C | 3.45353600  | 0.00139800  | 0.30141800  |
| C | 5.77286300  | -1.50592900 | 0.38201800  |
| C | 4.25060900  | -0.05180300 | -0.84559700 |

|   |             |             |             |
|---|-------------|-------------|-------------|
| C | 3.77223500  | -0.66473400 | 1.48461700  |
| C | 4.94657000  | -1.41584400 | 1.50316000  |
| C | 5.41281300  | -0.81823600 | -0.77897300 |
| C | 3.85939900  | 0.70425200  | -2.08838200 |
| C | 2.86915300  | -0.56489600 | 2.68477800  |
| C | 7.01984000  | -2.35176100 | 0.41231000  |
| H | -1.31981500 | -0.64992600 | 1.28140600  |
| H | -5.29294300 | 2.33421400  | 0.87093500  |
| H | -3.39936100 | -1.14216200 | 2.55502500  |
| H | -5.37302100 | 0.32796500  | 2.33489300  |
| H | -3.38947300 | 2.92741200  | -1.68850000 |
| H | -3.30658400 | 4.06563100  | -0.33158300 |
| H | -1.02189700 | 3.48166800  | -1.70702100 |
| H | -1.11752900 | 1.04112800  | -1.55242800 |
| H | 0.85975900  | 4.46145600  | -0.45286000 |
| H | 0.74209800  | 4.36418400  | 1.31938600  |
| H | 5.22134800  | -1.94181300 | 2.41409400  |
| H | 6.05381500  | -0.87754400 | -1.65515800 |
| H | 4.58619700  | 0.53120100  | -2.88380100 |
| H | 3.82469500  | 1.77919000  | -1.88293600 |
| H | 2.86624400  | 0.41205600  | -2.45138300 |
| H | 3.28926300  | -1.10928100 | 3.53183400  |
| H | 2.72410700  | 0.47897500  | 2.97792800  |
| H | 1.88004600  | -0.97924700 | 2.46392300  |
| H | 7.39323400  | -2.47062500 | 1.43171300  |
| H | 7.81185500  | -1.90906600 | -0.19615800 |
| H | 6.81751500  | -3.35102200 | 0.01344000  |
| H | -6.01322400 | -3.64344200 | 0.81689800  |

Re-TS1H

Zero-point correction= 0.530978 (Hartree/Particle)

|   |             |             |             |
|---|-------------|-------------|-------------|
| C | -3.42562200 | -1.45744100 | 1.43583000  |
| C | -6.19208100 | -1.37627600 | 0.91818400  |
| C | -4.33335500 | -1.99893000 | 2.34668700  |
| C | -3.91980500 | -0.88205000 | 0.27397800  |
| C | -5.28968000 | -0.83148200 | 0.01402400  |
| C | -5.70320000 | -1.96202000 | 2.08675400  |
| C | -5.55068100 | -0.13361400 | -1.30207400 |
| C | -4.24426900 | 0.62647000  | -1.55425000 |
| C | -3.16564700 | -0.25258400 | -0.87633200 |
| N | -2.02981900 | 0.56952400  | -0.47902800 |
| C | -2.00186100 | 1.93467400  | -0.54673700 |
| C | -3.21227600 | 2.68150100  | -1.01826200 |
| O | -4.35474800 | 1.86877400  | -0.87125700 |
| N | -0.83274800 | 2.39192300  | -0.21099100 |
| N | -0.11762800 | 1.24793500  | 0.06804200  |
| C | -0.81313400 | 0.11724700  | -0.09067200 |
| C | 1.26350400  | 1.35748300  | 0.44383000  |
| C | 3.93359500  | 1.53466100  | 1.15193900  |
| C | 2.21551700  | 1.44936600  | -0.57199000 |
| C | 1.59377000  | 1.34035900  | 1.79961200  |
| C | 2.94424000  | 1.42968800  | 2.13221100  |
| C | 3.55342900  | 1.54031200  | -0.19003600 |
| C | 1.79580800  | 1.41200400  | -2.01650200 |
| C | 0.52154200  | 1.21229400  | 2.84904600  |
| C | 5.38458200  | 1.65072100  | 1.54128700  |

|   |             |             |             |
|---|-------------|-------------|-------------|
| H | -2.35740000 | -1.47209500 | 1.63754900  |
| H | -7.26041700 | -1.33613800 | 0.72783500  |
| H | -3.97160200 | -2.44881000 | 3.26536100  |
| H | -6.39697700 | -2.38530500 | 2.80593800  |
| H | -5.72514900 | -0.85828800 | -2.10509400 |
| H | -6.39597500 | 0.55797700  | -1.27596100 |
| H | -4.02829300 | 0.80208800  | -2.61617200 |
| H | -2.76863400 | -1.00221600 | -1.57318000 |
| H | -3.07102300 | 2.97660400  | -2.06832800 |
| H | -3.36333900 | 3.58094500  | -0.42005100 |
| H | 3.23015000  | 1.41531200  | 3.18141900  |
| H | 4.31898600  | 1.58417800  | -0.96089000 |
| H | 2.66894100  | 1.30164800  | -2.66313400 |
| H | 1.27410600  | 2.33400500  | -2.29360600 |
| H | 1.11437800  | 0.57348300  | -2.20331000 |
| H | -0.24840700 | 1.97842200  | 2.71835200  |
| H | 0.02290800  | 0.23913900  | 2.78420300  |
| H | 0.94573000  | 1.31335400  | 3.84930000  |
| H | 5.61804800  | 0.99462700  | 2.38404200  |
| H | 5.62464600  | 2.67594600  | 1.84219600  |
| H | 6.03563900  | 1.37725900  | 0.70841100  |
| C | -0.32667400 | -1.60373900 | -0.79705900 |
| H | -1.03785700 | -2.17728400 | -0.16207500 |
| C | 1.08158600  | -1.69884200 | -0.27907900 |
| H | 1.21317700  | -1.62819000 | 0.79996000  |
| C | 2.10908400  | -1.80407000 | -1.12358500 |
| H | 1.86487100  | -1.83206100 | -2.18479000 |
| C | 3.53414600  | -1.76576200 | -0.76775900 |

|   |             |             |             |
|---|-------------|-------------|-------------|
| C | 4.47314800  | -1.50372400 | -1.77258800 |
| C | 3.99200800  | -1.90811300 | 0.54986600  |
| C | 5.82518200  | -1.35983400 | -1.47214500 |
| H | 4.12976500  | -1.39605800 | -2.79836200 |
| C | 5.34032800  | -1.77129100 | 0.85098300  |
| H | 3.28465400  | -2.12365000 | 1.34489800  |
| C | 6.26363400  | -1.49045300 | -0.15757000 |
| H | 6.53551300  | -1.14901700 | -2.26551800 |
| H | 5.67678000  | -1.88362900 | 1.87732700  |
| O | -0.55394000 | -1.49576200 | -2.02997200 |
| H | 7.31675500  | -1.38136400 | 0.08180700  |

*Si-TS1Cl*

Zero-point correction= 0.521020 (Hartree/Particle)

|   |             |             |             |
|---|-------------|-------------|-------------|
| C | 4.01179200  | -3.00819000 | -0.19357800 |
| C | 2.78488500  | -2.72409200 | 0.39263600  |
| C | 2.62883900  | -1.62348700 | 1.24482100  |
| C | 3.75087800  | -0.83427300 | 1.52334900  |
| C | 4.98391000  | -1.09963100 | 0.94023900  |
| C | 5.09888500  | -2.18296800 | 0.07777800  |
| H | 4.13027000  | -3.86022900 | -0.85364500 |
| H | 1.93669900  | -3.37031700 | 0.18800800  |
| H | 3.64577700  | 0.02477500  | 2.18024100  |
| H | 5.84345700  | -0.46979600 | 1.14027600  |
| C | 1.32175800  | -1.20530700 | 1.76938500  |
| H | 1.31791500  | -0.55065800 | 2.64042700  |
| C | 0.14278700  | -1.44616100 | 1.19181700  |
| C | -1.11745600 | -0.80478400 | 1.70563500  |

|   |             |             |             |
|---|-------------|-------------|-------------|
| H | 0.04728000  | -2.05969200 | 0.29662300  |
| O | -1.07932700 | -0.00510500 | 2.67212200  |
| H | -2.01055100 | -1.44850800 | 1.55677200  |
| C | 1.76715100  | 0.36770300  | -1.10407200 |
| C | 3.76154700  | 2.34085400  | -0.88382900 |
| C | 2.98458700  | 0.22075700  | -1.76782100 |
| C | 1.56963900  | 1.49688200  | -0.32283100 |
| C | 2.54509000  | 2.49076900  | -0.22978000 |
| C | 3.97783700  | 1.19258200  | -1.64692800 |
| C | 2.04929700  | 3.63839600  | 0.62331800  |
| C | 0.53523200  | 3.40740500  | 0.65889700  |
| C | 0.39941300  | 1.87239900  | 0.56063600  |
| N | -0.92349800 | 1.52407000  | 0.05859700  |
| C | -1.79956500 | 2.43050100  | -0.47512800 |
| C | -1.40492500 | 3.87177100  | -0.60766700 |
| O | -0.00520000 | 4.00412500  | -0.51391700 |
| N | -2.94726700 | 1.87504900  | -0.72825900 |
| N | -2.75751300 | 0.57319300  | -0.31930100 |
| C | -1.54272900 | 0.32335900  | 0.17570700  |
| C | -3.84545500 | -0.35979600 | -0.35851000 |
| C | -5.93090200 | -2.17835800 | -0.40272100 |
| C | -4.67472500 | -0.44612800 | 0.76348100  |
| C | -4.01781100 | -1.14531200 | -1.49793200 |
| C | -5.07516000 | -2.05423200 | -1.49804500 |
| C | -5.71550500 | -1.37178100 | 0.71697100  |
| C | -4.43943500 | 0.43539700  | 1.96201900  |
| C | -3.08257500 | -1.00890000 | -2.66954000 |
| C | -7.08499300 | -3.14706600 | -0.43393700 |



|    |             |             |             |
|----|-------------|-------------|-------------|
| H  | 0.99353700  | -0.39053800 | -1.18515800 |
| H  | 4.52649000  | 3.10869700  | -0.81434100 |
| H  | 3.16662200  | -0.66398500 | -2.36944900 |
| H  | 4.92489700  | 1.05714600  | -2.15988400 |
| H  | 2.45896700  | 3.58998200  | 1.63871000  |
| H  | 2.27800900  | 4.62353600  | 0.20981800  |
| H  | 0.04053000  | 3.81515000  | 1.55031000  |
| H  | 0.47442000  | 1.40839800  | 1.55212000  |
| H  | -1.90943800 | 4.45072300  | 0.17983000  |
| H  | -1.71105600 | 4.26510900  | -1.57810500 |
| H  | -5.23146500 | -2.68036200 | -2.37290900 |
| H  | -6.37400800 | -1.46547700 | 1.57704600  |
| H  | -5.16682900 | 0.21523400  | 2.74513400  |
| H  | -4.54337400 | 1.48925300  | 1.68363600  |
| H  | -3.43083000 | 0.30691300  | 2.37386500  |
| H  | -3.39013900 | -1.66119800 | -3.48821200 |
| H  | -3.06209600 | 0.02230500  | -3.03399800 |
| H  | -2.05862900 | -1.27170200 | -2.38444000 |
| H  | -6.90475600 | -3.95557800 | -1.14559700 |
| H  | -8.00693700 | -2.63868600 | -0.73407400 |
| H  | -7.25765100 | -3.58647800 | 0.55132800  |
| Cl | 6.63842900  | -2.51719000 | -0.68079200 |

Re-TS1Cl

Zero-point correction= 0.521326 (Hartree/Particle)

|   |             |             |            |
|---|-------------|-------------|------------|
| C | -3.81231400 | -1.82903900 | 1.09295600 |
| C | -6.59594900 | -1.73287500 | 0.68010200 |
| C | -4.67165300 | -2.60426600 | 1.87222700 |

|   |             |             |             |
|---|-------------|-------------|-------------|
| C | -4.36310000 | -1.01485600 | 0.11357200  |
| C | -5.74180700 | -0.95621400 | -0.09190700 |
| C | -6.05002300 | -2.55899400 | 1.66345700  |
| C | -6.06916300 | 0.02191000  | -1.19788800 |
| C | -4.79540800 | 0.86770900  | -1.29946200 |
| C | -3.66792400 | -0.10393100 | -0.87368400 |
| N | -2.54596900 | 0.64539600  | -0.32291900 |
| C | -2.55936100 | 1.99063400  | -0.07836200 |
| C | -3.80781700 | 2.78035000  | -0.32990900 |
| O | -4.91897400 | 1.91275700  | -0.34352100 |
| N | -1.39235400 | 2.40074700  | 0.31907000  |
| N | -0.63520200 | 1.24917600  | 0.31037500  |
| C | -1.30461800 | 0.15997700  | -0.08104200 |
| C | 0.76138100  | 1.33105300  | 0.63532000  |
| C | 3.46056400  | 1.50107000  | 1.23460300  |
| C | 1.64348500  | 1.71903000  | -0.37323200 |
| C | 1.17689500  | 1.00752500  | 1.92788700  |
| C | 2.54012600  | 1.09564900  | 2.20467500  |
| C | 2.99617400  | 1.80473800  | -0.04505400 |
| C | 1.13639200  | 1.98702100  | -1.76439200 |
| C | 0.17852500  | 0.57254700  | 2.96781900  |
| C | 4.92421500  | 1.62014100  | 1.57305600  |
| H | -2.73796000 | -1.84976900 | 1.25868300  |
| H | -7.67081600 | -1.68943000 | 0.53198500  |
| H | -4.26547800 | -3.24407500 | 2.64866800  |
| H | -6.70566400 | -3.16596000 | 2.27944000  |
| H | -6.25128700 | -0.49911400 | -2.14432300 |
| H | -6.93250200 | 0.65669400  | -0.98529500 |

|   |             |             |             |
|---|-------------|-------------|-------------|
| H | -4.62086400 | 1.29264000  | -2.29655400 |
| H | -3.27287400 | -0.65291800 | -1.73846900 |
| H | -3.71377400 | 3.31548000  | -1.28617000 |
| H | -3.96448900 | 3.51061900  | 0.46495100  |
| H | 2.89175500  | 0.84621800  | 3.20323300  |
| H | 3.70714100  | 2.09204200  | -0.81581400 |
| H | 1.97050400  | 2.13567700  | -2.45327100 |
| H | 0.50786400  | 2.88323400  | -1.78456800 |
| H | 0.52873400  | 1.14665800  | -2.12326400 |
| H | -0.61801200 | 1.31423300  | 3.07936900  |
| H | -0.29851500 | -0.37210500 | 2.68513700  |
| H | 0.66318600  | 0.43576800  | 3.93579400  |
| H | 5.26196600  | 0.76810700  | 2.16987600  |
| H | 5.11528300  | 2.52855900  | 2.15376500  |
| H | 5.53644400  | 1.66005800  | 0.66908100  |
| C | -0.79025000 | -1.34151100 | -1.18845500 |
| H | -1.49567300 | -2.05610400 | -0.70998000 |
| C | 0.61387700  | -1.52393500 | -0.68750300 |
| H | 0.72824300  | -1.71415700 | 0.37896200  |
| C | 1.65654800  | -1.38555800 | -1.50775100 |
| H | 1.43426200  | -1.15880900 | -2.54947100 |
| C | 3.06867200  | -1.38362900 | -1.10543700 |
| C | 4.02072800  | -0.83638600 | -1.97333200 |
| C | 3.49865500  | -1.83180200 | 0.15119100  |
| C | 5.35221800  | -0.69668400 | -1.59536800 |
| H | 3.70566600  | -0.48933900 | -2.95365400 |
| C | 4.82351400  | -1.70644000 | 0.54312500  |
| H | 2.78811500  | -2.27994400 | 0.83823100  |

|    |             |             |             |
|----|-------------|-------------|-------------|
| C  | 5.73829100  | -1.12765200 | -0.33258000 |
| H  | 6.08123400  | -0.25740100 | -2.26717500 |
| H  | 5.15081400  | -2.04842100 | 1.51900100  |
| O  | -1.01538500 | -0.94533900 | -2.35883700 |
| Cl | 7.40006000  | -0.93344100 | 0.17395500  |

RR-TS4H

Zero-point correction= 0.783401 (Hartree/Particle)

|    |             |             |             |
|----|-------------|-------------|-------------|
| C  | -0.12017300 | -0.24874300 | -0.95763900 |
| C  | -0.55666500 | 2.46912400  | -0.05639800 |
| C  | 1.57262400  | 2.02489300  | -1.15612000 |
| C  | 0.30473200  | 2.57820800  | -1.19998900 |
| C  | 1.26492300  | -0.25414400 | -1.13849200 |
| O  | -0.24043100 | 1.74304400  | 0.90571800  |
| O  | -0.92802900 | 0.19336600  | -1.81368500 |
| Si | 2.86184100  | 2.34069000  | 0.19326400  |
| C  | 3.98097600  | 3.61829400  | -0.64783700 |
| C  | 3.97804300  | 0.88258400  | 0.60541100  |
| C  | 2.20945700  | 3.14389400  | 1.76156800  |
| C  | 1.79454700  | -0.46854000 | -2.54775900 |
| C  | 3.30391600  | -0.51302800 | -2.56244500 |
| C  | 6.11073500  | -0.59600800 | -2.44366000 |
| C  | 4.07342700  | 0.48273400  | -3.16552700 |
| C  | 3.96536600  | -1.56105200 | -1.91186700 |
| C  | 5.35337000  | -1.60643200 | -1.85123800 |
| C  | 5.46674000  | 0.44667700  | -3.10328300 |
| C  | -1.89642700 | 3.14512200  | -0.03601700 |
| C  | -4.39525200 | 4.39714200  | 0.13058200  |

|   |             |             |             |
|---|-------------|-------------|-------------|
| C | -2.22878700 | 4.18176300  | -0.91340800 |
| C | -2.82471800 | 2.75106800  | 0.93250000  |
| C | -4.06746400 | 3.37077000  | 1.01552700  |
| C | -3.47193000 | 4.80202100  | -0.83185300 |
| H | 2.07004500  | 2.02374500  | -2.12893900 |
| H | -0.13566200 | 2.88522500  | -2.14288400 |
| H | 1.89998900  | -0.61124700 | -0.33866100 |
| H | 4.79488500  | 3.91888200  | 0.02045900  |
| H | 3.42233500  | 4.51713800  | -0.92660700 |
| H | 4.43088600  | 3.20123700  | -1.55544600 |
| H | 4.64967400  | 1.17488600  | 1.42178300  |
| H | 4.59289300  | 0.61763800  | -0.26099100 |
| H | 3.43793200  | -0.00975500 | 0.92719300  |
| H | 3.04847200  | 3.58498500  | 2.31109000  |
| H | 1.50092900  | 3.94212500  | 1.52131400  |
| H | 1.69624500  | 2.43129400  | 2.40679000  |
| H | 1.41236900  | -1.42845100 | -2.92893100 |
| H | 1.41197500  | 0.29515800  | -3.23037000 |
| H | 3.57899300  | 1.29702600  | -3.68967200 |
| H | 3.37650700  | -2.34257100 | -1.43439400 |
| H | 5.84635100  | -2.42581800 | -1.33664400 |
| H | 6.04714500  | 1.23487700  | -3.57291700 |
| H | -5.36303200 | 4.88449500  | 0.19458200  |
| H | -1.50594200 | 4.51863300  | -1.64947000 |
| H | -2.55558000 | 1.94972300  | 1.61471100  |
| H | -4.77900000 | 3.04900500  | 1.77086800  |
| H | -3.71846300 | 5.60799400  | -1.51561800 |
| C | -0.76321700 | -0.70592500 | 0.32030700  |

|   |             |             |             |
|---|-------------|-------------|-------------|
| N | -0.27723500 | -1.28345700 | 1.43378900  |
| N | -2.11122200 | -0.71737100 | 0.49489100  |
| N | -1.26442400 | -1.61102100 | 2.32428700  |
| C | 1.07645900  | -1.54297100 | 1.83571200  |
| C | -2.35724900 | -1.26454500 | 1.72200200  |
| C | -3.22484700 | -0.39735300 | -0.42420200 |
| C | 1.77138600  | -2.59098100 | 1.22112800  |
| C | 1.59503200  | -0.80683400 | 2.90489700  |
| C | -3.76381400 | -1.31422400 | 2.21537500  |
| H | -2.89514700 | 0.44139800  | -1.03224200 |
| C | -4.53826200 | -0.05602500 | 0.37753100  |
| C | -3.59031100 | -1.61154600 | -1.25180800 |
| C | 3.07608100  | -2.82872100 | 1.64666700  |
| C | 1.12892200  | -3.43185500 | 0.15014800  |
| C | 2.89737600  | -1.10476400 | 3.30938400  |
| C | 0.77107800  | 0.22891800  | 3.62126500  |
| H | -3.77583900 | -1.33894900 | 3.30492700  |
| H | -4.27854600 | -2.20660100 | 1.83130500  |
| O | -4.39157700 | -0.12451700 | 1.78722800  |
| C | -5.63535600 | -1.01284200 | -0.15086000 |
| H | -4.79509100 | 0.98479100  | 0.18631500  |
| C | -4.92605000 | -1.96477700 | -1.07654600 |
| C | -2.75605600 | -2.34401000 | -2.09378200 |
| C | 3.65802100  | -2.08783000 | 2.67869000  |
| H | 3.64700200  | -3.62259400 | 1.17056900  |
| H | 0.96698000  | -2.85063600 | -0.76469100 |
| H | 0.15330500  | -3.80393000 | 0.47840900  |
| H | 1.76013900  | -4.28860900 | -0.09244300 |

|   |             |             |             |
|---|-------------|-------------|-------------|
| H | 3.33137200  | -0.53704900 | 4.12864300  |
| H | 0.05093600  | -0.25874700 | 4.28551400  |
| H | 0.21178000  | 0.84922600  | 2.91522100  |
| H | 1.41534000  | 0.86987700  | 4.22642700  |
| H | -6.13425400 | -1.51689000 | 0.68401600  |
| H | -6.40721300 | -0.44799300 | -0.68225700 |
| C | -5.45089300 | -3.07218200 | -1.73925700 |
| C | -3.28206000 | -3.45341500 | -2.74942300 |
| H | -1.72755200 | -2.03313800 | -2.24514500 |
| C | 5.09278800  | -2.32103300 | 3.07021700  |
| C | -4.61966100 | -3.81652200 | -2.57126500 |
| H | -6.49204100 | -3.35148300 | -1.60675500 |
| H | -2.65027300 | -4.03731100 | -3.41077000 |
| H | 5.75457300  | -1.72190300 | 2.43532100  |
| H | 5.27457400  | -2.03160700 | 4.10739200  |
| H | 5.37419500  | -3.36945400 | 2.94691000  |
| H | -5.01472300 | -4.68389500 | -3.09047300 |
| H | 7.19440400  | -0.62403400 | -2.39342200 |

RS-TS4H

Zero-point correction= 0.782312 (Hartree/Particle)

|   |             |            |             |
|---|-------------|------------|-------------|
| C | -0.24981300 | 0.00274000 | 0.44054800  |
| C | 0.93821400  | 2.61972900 | -0.15428600 |
| C | -1.46143700 | 2.43527400 | 0.11743800  |
| C | -0.25505700 | 2.90199400 | 0.60314800  |
| C | -1.59391400 | 0.29058300 | 0.71723500  |
| O | 0.90562700  | 2.06027300 | -1.26676500 |
| O | 0.69048300  | 0.28517600 | 1.22866900  |

|   |             |             |             |
|---|-------------|-------------|-------------|
| C | -1.93921500 | 0.34066800  | 2.19051700  |
| C | -1.98293100 | -1.07998600 | 2.71010300  |
| C | -2.01850200 | -3.79103800 | 3.44079800  |
| C | -3.15326000 | -1.83588900 | 2.59527500  |
| C | -0.82889200 | -1.69864500 | 3.20522800  |
| C | -0.84709800 | -3.04492100 | 3.56347300  |
| C | -3.17452900 | -3.18002900 | 2.95979600  |
| C | 2.27754600  | 3.01019900  | 0.40337800  |
| C | 4.82754600  | 3.65148200  | 1.35098300  |
| C | 2.55655500  | 2.94489500  | 1.77112600  |
| C | 3.28831100  | 3.38634100  | -0.48615900 |
| C | 4.55650600  | 3.71278300  | -0.01544300 |
| C | 3.82780100  | 3.26325100  | 2.24114200  |
| H | -0.17019500 | 3.38868700  | 1.57013200  |
| H | -2.38332600 | -0.02876900 | 0.04860800  |
| H | -1.17811000 | 0.92615500  | 2.71492400  |
| H | -2.91178100 | 0.81373200  | 2.34840400  |
| H | -4.05325400 | -1.36520500 | 2.20446800  |
| H | 0.08473400  | -1.11590700 | 3.28190200  |
| H | 0.05612800  | -3.51190400 | 3.94576000  |
| H | -4.09349700 | -3.75142000 | 2.86639900  |
| H | 5.81736200  | 3.90024400  | 1.72072900  |
| H | 1.78609700  | 2.59585500  | 2.45138700  |
| H | 3.05638500  | 3.41877100  | -1.54673900 |
| H | 5.33287900  | 4.01602200  | -0.71124000 |
| H | 4.04320800  | 3.19622200  | 3.30284800  |
| C | 0.18157200  | -0.57483100 | -0.86986100 |
| N | -0.52683900 | -1.18405900 | -1.83157900 |



|   |             |             |             |
|---|-------------|-------------|-------------|
| N | 1.46778500  | -0.75839400 | -1.23451500 |
| N | 0.26240100  | -1.72024500 | -2.81077800 |
| C | -1.95233700 | -1.29032000 | -1.90882400 |
| C | 1.46936800  | -1.45245900 | -2.40741400 |
| C | 2.72457600  | -0.35340000 | -0.60384500 |
| C | -2.57937700 | -2.28808500 | -1.16130600 |
| C | -2.63731200 | -0.33395600 | -2.66112200 |
| C | 2.78988100  | -1.68804600 | -3.06117200 |
| H | 2.51290900  | 0.51380500  | 0.01729500  |
| C | 3.80989500  | -0.01743400 | -1.68286600 |
| C | 3.31479600  | -1.49111600 | 0.19556700  |
| C | -3.97382000 | -2.29111000 | -1.15512800 |
| C | -1.77379800 | -3.26058600 | -0.34352300 |
| C | -4.02918000 | -0.38999900 | -2.63294100 |
| C | -1.88937900 | 0.70664700  | -3.45226200 |
| H | 2.65056800  | -1.94352400 | -4.11142700 |
| H | 3.32937400  | -2.50289000 | -2.55788200 |
| O | 3.49633400  | -0.46681500 | -2.99578700 |
| C | 5.11077600  | -0.65869600 | -1.14387800 |
| H | 3.89489000  | 1.06496900  | -1.78049900 |
| C | 4.65848000  | -1.67228100 | -0.12078600 |
| C | 2.66977700  | -2.29009800 | 1.13362000  |
| C | -4.70951300 | -1.34508600 | -1.87166100 |
| H | -4.49410200 | -3.04173100 | -0.56535000 |
| H | -1.33165400 | -2.75672300 | 0.52623800  |
| H | -0.96212900 | -3.69494200 | -0.93456900 |
| H | -2.40686800 | -4.06608300 | 0.03149500  |
| H | -4.59754400 | 0.34229600  | -3.20194600 |

|    |             |             |             |
|----|-------------|-------------|-------------|
| H  | -1.43454100 | 0.25729500  | -4.34081700 |
| H  | -1.07848900 | 1.15658400  | -2.86821300 |
| H  | -2.56598800 | 1.49929100  | -3.77708300 |
| H  | 5.68640500  | -1.09026200 | -1.96812900 |
| H  | 5.73538900  | 0.10872500  | -0.67327700 |
| C  | 5.38956900  | -2.67777900 | 0.50601800  |
| C  | 3.40295900  | -3.29910200 | 1.75380400  |
| H  | 1.62435700  | -2.11611000 | 1.37661900  |
| C  | -6.21406400 | -1.32073300 | -1.80284400 |
| C  | 4.75126500  | -3.49069200 | 1.44106200  |
| H  | 6.43771100  | -2.83163500 | 0.26689600  |
| H  | 2.92454700  | -3.94055400 | 2.48705800  |
| H  | -6.54918400 | -0.50127900 | -1.15801500 |
| H  | -6.65219300 | -1.16092400 | -2.79117700 |
| H  | -6.60972600 | -2.25317900 | -1.39569500 |
| H  | 5.30781300  | -4.28280000 | 1.93189200  |
| H  | -1.41697000 | 2.13009700  | -0.92963200 |
| Si | -3.12401300 | 3.14363500  | 0.63406300  |
| C  | -4.52730000 | 1.93118700  | 0.28225900  |
| H  | -4.50859700 | 1.03412700  | 0.90718700  |
| H  | -5.49444500 | 2.42404500  | 0.42551100  |
| H  | -4.46934800 | 1.60357600  | -0.76206100 |
| C  | -3.41204100 | 4.64217500  | -0.47563200 |
| H  | -3.41338100 | 4.35245200  | -1.53111500 |
| H  | -4.37441800 | 5.11496500  | -0.25425700 |
| H  | -2.62387800 | 5.38715300  | -0.33449100 |
| C  | -3.10691200 | 3.73193600  | 2.42270300  |
| H  | -2.35771000 | 4.52019800  | 2.54711600  |

|   |             |             |            |
|---|-------------|-------------|------------|
| H | -4.08000300 | 4.15766600  | 2.68747100 |
| H | -2.87905900 | 2.93727700  | 3.13650900 |
| H | -2.03144500 | -4.83884700 | 3.72343800 |

SR-TS4H

Zero-point correction= 0.782534 (Hartree/Particle)

|   |             |             |             |
|---|-------------|-------------|-------------|
| C | 0.22447600  | -0.18528300 | 0.68603700  |
| C | -0.68021300 | 2.45232800  | -0.38883400 |
| C | 1.67667600  | 1.97063000  | -0.03288900 |
| C | 0.54871900  | 2.68661600  | 0.32347800  |
| C | 1.55538800  | 0.05822200  | 1.05009000  |
| O | -0.74868600 | 1.71125700  | -1.38900600 |
| C | 1.75359500  | 0.49003300  | 2.48648500  |
| C | 1.51382600  | -0.67184700 | 3.42636500  |
| C | 1.05865900  | -2.89021300 | 5.08455600  |
| C | 2.53039500  | -1.59919700 | 3.67522500  |
| C | 0.26330500  | -0.87185200 | 4.01871900  |
| C | 0.03865600  | -1.97286600 | 4.84221200  |
| C | 2.30793000  | -2.70055900 | 4.49713000  |
| C | -1.91463000 | 3.17970400  | 0.05654300  |
| C | -4.23805800 | 4.52806600  | 0.82079300  |
| C | -2.79593100 | 3.66909800  | -0.91032100 |
| C | -2.21091800 | 3.35674300  | 1.40966300  |
| C | -3.37180000 | 4.02437700  | 1.78931100  |
| C | -3.94816200 | 4.35039500  | -0.53109800 |
| H | 0.54338500  | 3.36655600  | 1.17051300  |
| H | 2.36456600  | -0.47848600 | 0.56811200  |
| H | 2.76856300  | 0.87020900  | 2.63424800  |

|   |             |             |             |
|---|-------------|-------------|-------------|
| H | 1.05066800  | 1.30122700  | 2.70243300  |
| H | 3.50732200  | -1.45077800 | 3.21886200  |
| H | -0.53128400 | -0.16184800 | 3.81132600  |
| H | -0.93593500 | -2.11270900 | 5.30038300  |
| H | 3.11055000  | -3.40740400 | 4.68439700  |
| H | -5.14056700 | 5.05249700  | 1.11882000  |
| H | -2.56042500 | 3.50381000  | -1.95805100 |
| H | -1.54563800 | 2.92975300  | 2.15408300  |
| H | -3.60632500 | 4.14555300  | 2.84224900  |
| H | -4.62281000 | 4.74007600  | -1.28766600 |
| O | -0.76233100 | 0.32188400  | 1.27609600  |
| C | -0.10275000 | -1.02624400 | -0.50852400 |
| N | 0.62165700  | -1.46343100 | -1.55231400 |
| N | -1.30747700 | -1.62089000 | -0.66195800 |
| N | -0.08846600 | -2.31220600 | -2.36061800 |
| C | 2.01746200  | -1.27865900 | -1.85032500 |
| C | -1.25486700 | -2.38036100 | -1.79493000 |
| C | -2.50579000 | -1.66907000 | 0.17954200  |
| C | 2.38460300  | -0.34301600 | -2.81910500 |
| C | 2.92859500  | -2.14120100 | -1.22945800 |
| C | -2.41699900 | -3.27848900 | -2.06048100 |
| H | -2.22551600 | -1.27403900 | 1.15622600  |
| C | -3.03313900 | -3.13795200 | 0.27874700  |
| C | -3.67513600 | -0.91044500 | -0.40820800 |
| C | 3.74694200  | -0.23127100 | -3.10583000 |
| C | 1.35251700  | 0.46473400  | -3.55728800 |
| C | 4.27376800  | -1.99387900 | -1.55800100 |
| C | 2.46291000  | -3.18488300 | -0.24804700 |

|   |             |             |             |
|---|-------------|-------------|-------------|
| H | -2.14548500 | -4.03262100 | -2.79871500 |
| H | -3.28295500 | -2.70888200 | -2.41838800 |
| O | -2.68247100 | -3.95043700 | -0.84024500 |
| C | -4.56122400 | -2.97702800 | 0.40030500  |
| H | -2.59884800 | -3.64923700 | 1.13992600  |
| C | -4.84644400 | -1.65361700 | -0.26779200 |
| C | -3.66584900 | 0.34471100  | -1.00096700 |
| C | 4.70045700  | -1.03609100 | -2.48209100 |
| H | 4.06517000  | 0.49622600  | -3.84842600 |
| H | 0.63504500  | 0.93201300  | -2.87545500 |
| H | 0.79004900  | -0.18563600 | -4.23573400 |
| H | 1.83547500  | 1.24227000  | -4.15214000 |
| H | 5.00535600  | -2.64258100 | -1.08299600 |
| H | 2.06486200  | -2.72536600 | 0.66446500  |
| H | 3.28951300  | -3.83791200 | 0.03530100  |
| H | 1.66968300  | -3.80133000 | -0.68226200 |
| H | -5.06717500 | -3.82833100 | -0.06242900 |
| H | -4.85241700 | -2.95005900 | 1.45674000  |
| C | -6.05539600 | -1.13557100 | -0.71746400 |
| C | -4.88234300 | 0.85770500  | -1.45188100 |
| H | -2.73503200 | 0.89327800  | -1.12832300 |
| C | 6.16741800  | -0.85310300 | -2.76855700 |
| C | -6.06340800 | 0.12759600  | -1.30953200 |
| H | -6.97427700 | -1.70592300 | -0.61863500 |
| H | -4.90651600 | 1.83913600  | -1.91457400 |
| H | 6.32883500  | -0.43394100 | -3.76384400 |
| H | 6.60987100  | -0.16408500 | -2.04079500 |
| H | 6.70692100  | -1.80023600 | -2.69767700 |

|    |             |             |             |
|----|-------------|-------------|-------------|
| H  | -6.99874100 | 0.54410000  | -1.67014700 |
| Si | 3.41905700  | 2.57403100  | 0.33895200  |
| H  | 1.58588800  | 1.46369500  | -0.99452700 |
| C  | 3.93234600  | 3.56393900  | -1.18232600 |
| H  | 3.23823800  | 4.38870900  | -1.36633000 |
| H  | 4.93817100  | 3.97960300  | -1.06444100 |
| H  | 3.93398300  | 2.92073900  | -2.06902700 |
| C  | 4.65257700  | 1.15871200  | 0.50804800  |
| H  | 4.53988200  | 0.57938800  | 1.42826600  |
| H  | 4.53758900  | 0.47191600  | -0.33740500 |
| H  | 5.67405800  | 1.55300900  | 0.48297900  |
| C  | 3.43589300  | 3.69636900  | 1.85010300  |
| H  | 2.81801000  | 4.58174100  | 1.67198100  |
| H  | 3.05713200  | 3.19765200  | 2.74616300  |
| H  | 4.45478600  | 4.03744400  | 2.05858100  |
| H  | 0.88314800  | -3.74527600 | 5.72966600  |

#### SS-TS4H

Zero-point correction= 0.782831 (Hartree/Particle)

|    |             |            |             |
|----|-------------|------------|-------------|
| C  | 0.06853700  | 0.53659600 | 0.57858500  |
| C  | -2.87328500 | 1.40249900 | 0.46644900  |
| C  | -1.15762700 | 3.11308000 | 0.52772300  |
| C  | -2.19720600 | 2.45809800 | 1.16151800  |
| C  | 0.60137700  | 1.82592300 | 0.78372900  |
| O  | -2.53358500 | 1.05774300 | -0.68094900 |
| Si | -1.11888400 | 3.52316200 | -1.32243300 |
| C  | -2.84799700 | 3.91537700 | -1.95558200 |
| C  | -0.25733500 | 2.35055100 | -2.52218700 |

|   |             |             |             |
|---|-------------|-------------|-------------|
| C | -0.10965900 | 5.12810300  | -1.38014800 |
| C | 0.85826700  | 2.21835700  | 2.22600500  |
| C | 1.93144400  | 1.35611700  | 2.85516100  |
| C | 3.92051100  | -0.26483900 | 3.99710700  |
| C | 3.28706000  | 1.65297000  | 2.67850100  |
| C | 1.58621500  | 0.22650800  | 3.60503300  |
| C | 2.57400600  | -0.57514800 | 4.17435700  |
| C | 4.27585800  | 0.85021200  | 3.24131300  |
| C | -3.98990400 | 0.69420300  | 1.17162900  |
| C | -6.04907400 | -0.69089300 | 2.45345800  |
| C | -4.11858000 | -0.68427700 | 1.00862200  |
| C | -4.89870300 | 1.37830700  | 1.98187000  |
| C | -5.93125700 | 0.68838600  | 2.61294600  |
| C | -5.13572500 | -1.37762200 | 1.65363600  |
| H | -0.68063900 | 3.89226600  | 1.12767900  |
| H | -2.39540900 | 2.59130000  | 2.22107400  |
| H | 1.24320400  | 2.26222200  | 0.02542600  |
| H | -2.79869700 | 4.32616900  | -2.96947000 |
| H | -3.33668900 | 4.65599400  | -1.31571800 |
| H | -3.46308000 | 3.01335600  | -1.97100400 |
| H | -0.39942100 | 2.74440800  | -3.53504000 |
| H | 0.82278800  | 2.28396600  | -2.35261800 |
| H | -0.69450700 | 1.35123700  | -2.48347700 |
| H | -0.58457500 | 5.91788100  | -0.78906300 |
| H | 0.89819600  | 4.97486800  | -0.97688200 |
| H | -0.00347100 | 5.49588300  | -2.40579300 |
| H | 1.15611700  | 3.27117900  | 2.27671400  |
| H | -0.07313900 | 2.10470700  | 2.78960100  |

|   |             |             |             |
|---|-------------|-------------|-------------|
| H | 3.56635600  | 2.53604800  | 2.10597000  |
| H | 0.53506700  | -0.01657400 | 3.72732700  |
| H | 2.28977500  | -1.44351700 | 4.76159000  |
| H | 5.32309300  | 1.09767200  | 3.09609100  |
| H | -6.84849000 | -1.22860100 | 2.95407100  |
| H | -3.38964100 | -1.19338500 | 0.39350400  |
| H | -4.80589000 | 2.45410200  | 2.10234500  |
| H | -6.64351800 | 1.22664000  | 3.23058000  |
| H | -5.20976400 | -2.45584500 | 1.53848300  |
| O | -0.66745400 | -0.05964300 | 1.39335800  |
| C | 0.45246100  | -0.17049800 | -0.69796700 |
| N | -0.20460500 | -1.09977800 | -1.41032300 |
| N | 1.65774200  | -0.05196300 | -1.31969200 |
| N | 0.52261900  | -1.53238400 | -2.48689300 |
| C | -1.42462100 | -1.83189600 | -1.16061100 |
| C | 1.63978400  | -0.88400300 | -2.40397500 |
| C | 2.97025600  | 0.42345600  | -0.84257400 |
| C | -1.38927200 | -2.81666900 | -0.16858800 |
| C | -2.48888100 | -1.69334400 | -2.06066800 |
| C | 2.83326200  | -0.90272100 | -3.30251800 |
| H | 2.82256600  | 1.26550500  | -0.17254800 |
| C | 3.89017700  | 0.81606300  | -2.05396300 |
| C | 3.70600400  | -0.69681400 | -0.14834800 |
| C | -2.51608400 | -3.63078300 | -0.03270000 |
| C | -0.18331600 | -3.02380000 | 0.70606400  |
| C | -3.57998900 | -2.54053400 | -1.88479200 |
| C | -2.49006900 | -0.67592100 | -3.16713200 |
| H | 2.53114900  | -1.14906900 | -4.32039300 |



|   |             |             |             |
|---|-------------|-------------|-------------|
| H | 3.56611500  | -1.64530200 | -2.95665700 |
| O | 3.36627100  | 0.40473200  | -3.30547800 |
| C | 5.26295400  | 0.16905000  | -1.74481600 |
| H | 3.96089300  | 1.90094700  | -2.13699000 |
| C | 4.99035600  | -0.84702000 | -0.66309600 |
| C | 3.22758800  | -1.49420600 | 0.88362200  |
| C | -3.61776900 | -3.50489900 | -0.87564200 |
| H | -2.51756800 | -4.39342100 | 0.74170600  |
| H | -0.09993500 | -2.19983100 | 1.42134200  |
| H | 0.73616900  | -3.05759600 | 0.11021200  |
| H | -0.26723400 | -3.96659000 | 1.24923300  |
| H | -4.42672700 | -2.44320800 | -2.55975500 |
| H | -1.52181500 | -0.62333500 | -3.67040100 |
| H | -2.71907700 | 0.30545800  | -2.74439500 |
| H | -3.24879100 | -0.93109200 | -3.90938300 |
| H | 5.68328100  | -0.26341200 | -2.65818100 |
| H | 5.96857000  | 0.92961100  | -1.39529200 |
| C | 5.82878100  | -1.83182800 | -0.14775000 |
| C | 4.06739800  | -2.48075400 | 1.39336000  |
| H | 2.23486800  | -1.33427300 | 1.30040700  |
| C | -4.82402500 | -4.39514200 | -0.72415700 |
| C | 5.35487400  | -2.64881100 | 0.87780000  |
| H | 6.83250900  | -1.96589200 | -0.53962200 |
| H | 3.72214900  | -3.11184700 | 2.20574000  |
| H | -5.73530500 | -3.79756500 | -0.62798500 |
| H | -4.94644500 | -5.03939900 | -1.60011200 |
| H | -4.73775100 | -5.03372200 | 0.15764400  |
| H | 5.99698000  | -3.42357900 | 1.28429400  |

H 4.68922600 -0.89100300 4.43907800

*RR-TS4Cl*

Zero-point correction= 0.773642 (Hartree/Particle)

C -0.37808300 -0.26080400 -0.88816200  
C -0.97678700 2.46669500 -0.08705700  
C 1.24251200 2.06731100 -1.01024600  
C -0.03587700 2.57648800 -1.16575200  
C 1.01679300 -0.21223800 -0.95735900  
O -0.71320100 1.76915200 0.91168400  
O -1.12817700 0.12367600 -1.82016800  
Si 2.40859900 2.47106800 0.42543500  
C 3.54512300 3.76521900 -0.36450100  
C 3.53884200 1.06495200 0.96394400  
C 1.60728200 3.28857300 1.91465100  
C 1.65934000 -0.44274900 -2.31641600  
C 3.16475500 -0.44462600 -2.21004400  
C 5.93493800 -0.44406300 -1.86132500  
C 3.95567100 0.55758300 -2.77219400  
C 3.79932000 -1.45632300 -1.48053600  
C 5.17652600 -1.46730600 -1.29988500  
C 5.33941800 0.56971800 -2.60011000  
C -2.33051000 3.10828100 -0.17810400  
C -4.86353700 4.29998500 -0.21591400  
C -2.62677600 4.11169600 -1.10569100  
C -3.31257900 2.71733500 0.73707100  
C -4.57243700 3.30706200 0.71850600  
C -3.88694100 4.70189800 -1.12570900

|   |             |             |             |
|---|-------------|-------------|-------------|
| H | 1.81404800  | 2.06332600  | -1.94176400 |
| H | -0.41143900 | 2.84818100  | -2.14667100 |
| H | 1.59934900  | -0.52623300 | -0.10134100 |
| H | 4.29424700  | 4.11223800  | 0.35494800  |
| H | 2.97925900  | 4.63556900  | -0.71075700 |
| H | 4.07879100  | 3.34281600  | -1.22297200 |
| H | 4.14342900  | 1.40421200  | 1.81356900  |
| H | 4.22195300  | 0.79570800  | 0.15181600  |
| H | 3.00635700  | 0.16484600  | 1.27720300  |
| H | 2.38358600  | 3.78309900  | 2.50889700  |
| H | 0.88413900  | 4.04620500  | 1.59865800  |
| H | 1.08016600  | 2.57186300  | 2.54401100  |
| H | 1.33425600  | -1.42011700 | -2.70547000 |
| H | 1.31295800  | 0.29621800  | -3.04394800 |
| H | 3.48966800  | 1.34744200  | -3.35533600 |
| H | 3.19816800  | -2.24405300 | -1.03072200 |
| H | 5.66048900  | -2.25131400 | -0.72774000 |
| H | 5.94794100  | 1.35509900  | -3.03440800 |
| H | -5.84462400 | 4.76414700  | -0.23110300 |
| H | -1.86379000 | 4.44686500  | -1.80087400 |
| H | -3.07123100 | 1.94230500  | 1.45883300  |
| H | -5.32581700 | 2.98796300  | 1.43324700  |
| H | -4.10561300 | 5.48245300  | -1.84736200 |
| C | -1.10461900 | -0.70852500 | 0.34780400  |
| N | -0.68672900 | -1.25019400 | 1.50557300  |
| N | -2.46060400 | -0.75032200 | 0.42467500  |
| N | -1.72747500 | -1.58276000 | 2.33050200  |
| C | 0.64065300  | -1.47322200 | 2.00526200  |

|   |             |             |             |
|---|-------------|-------------|-------------|
| C | -2.78191200 | -1.27637600 | 1.64360500  |
| C | -3.51191500 | -0.47732000 | -0.57868800 |
| C | 1.39977300  | -2.51410000 | 1.45811300  |
| C | 1.06779900  | -0.70799700 | 3.09417200  |
| C | -4.21916600 | -1.34844800 | 2.03601600  |
| H | -3.15775300 | 0.35470500  | -1.18218600 |
| C | -4.88627700 | -0.14744400 | 0.11894200  |
| C | -3.79140200 | -1.71885500 | -1.39924600 |
| C | 2.67659200  | -2.71487000 | 1.97730300  |
| C | 0.85389800  | -3.38488800 | 0.35783600  |
| C | 2.34461000  | -0.96989700 | 3.59374200  |
| C | 0.17604500  | 0.32557200  | 3.72735600  |
| H | -4.30940300 | -1.35005700 | 3.12217800  |
| H | -4.68544900 | -2.26054900 | 1.63670900  |
| O | -4.83975900 | -0.18292100 | 1.53672300  |
| C | -5.92280200 | -1.13900900 | -0.46443300 |
| H | -5.14981200 | 0.88317300  | -0.11350900 |
| C | -5.12919600 | -2.09639700 | -1.31278600 |
| C | -2.88325400 | -2.45362500 | -2.15861600 |
| C | 3.16893500  | -1.94505700 | 3.03468800  |
| H | 3.29592500  | -3.50427400 | 1.55736700  |
| H | 0.75192100  | -2.82314000 | -0.57773200 |
| H | -0.13766100 | -3.76844400 | 0.61779600  |
| H | 1.51517600  | -4.23483400 | 0.17975000  |
| H | 2.70834500  | -0.37888300 | 4.43051400  |
| H | -0.57778400 | -0.16131800 | 4.35365500  |
| H | -0.34655700 | 0.91585500  | 2.96934400  |
| H | 0.76443200  | 0.99516600  | 4.35783600  |

|    |             |             |             |
|----|-------------|-------------|-------------|
| H  | -6.47131800 | -1.63451300 | 0.34401400  |
| H  | -6.66471600 | -0.60285900 | -1.06380700 |
| C  | -5.58220500 | -3.23004900 | -1.98401600 |
| C  | -3.33787000 | -3.58922400 | -2.82270600 |
| H  | -1.85255100 | -2.12488900 | -2.24185200 |
| C  | 4.57681700  | -2.13989800 | 3.53077400  |
| C  | -4.67777100 | -3.97606800 | -2.73408200 |
| H  | -6.62464700 | -3.52807100 | -1.92080100 |
| H  | -2.64791800 | -4.17531100 | -3.42096300 |
| H  | 5.26722800  | -1.51943900 | 2.94908700  |
| H  | 4.67282200  | -1.85025200 | 4.57931600  |
| H  | 4.89592700  | -3.17944200 | 3.42621700  |
| H  | -5.01661800 | -4.86367000 | -3.25877900 |
| Cl | 7.66906600  | -0.43900200 | -1.63466900 |

RS-TS4Cl

Zero-point correction= 0.772494 (Hartree/Particle)

|   |             |             |             |
|---|-------------|-------------|-------------|
| C | -0.14956500 | -0.18018500 | -0.32528100 |
| C | 1.51668900  | -2.59284600 | -0.51763900 |
| C | -0.89212500 | -2.79335200 | -0.65618400 |
| C | 0.33399100  | -2.87936400 | -1.28898400 |
| C | -1.43964300 | -0.64230700 | -0.62652100 |
| O | 1.47490800  | -2.36093100 | 0.70574900  |
| O | 0.75310700  | -0.05160200 | -1.19283600 |
| C | -1.89124800 | -0.36364900 | -2.04505600 |
| C | -2.21502300 | 1.10971400  | -2.14983000 |
| C | -2.75492000 | 3.84490900  | -2.08250000 |
| C | -3.47910300 | 1.58124000  | -1.78516500 |

|   |             |             |             |
|---|-------------|-------------|-------------|
| C | -1.22764900 | 2.03997400  | -2.49403600 |
| C | -1.48945500 | 3.40709800  | -2.45858700 |
| C | -3.76023900 | 2.94397100  | -1.75104000 |
| C | 2.85583000  | -2.56828700 | -1.19812000 |
| C | 5.39678200  | -2.45214100 | -2.35688200 |
| C | 3.01404300  | -2.08522900 | -2.49982400 |
| C | 3.98077300  | -2.98078300 | -0.47778300 |
| C | 5.24566100  | -2.93028100 | -1.05574100 |
| C | 4.28070100  | -2.02626200 | -3.07475200 |
| H | 0.42385800  | -3.06677100 | -2.35475600 |
| H | -2.21509200 | -0.66790100 | 0.12881500  |
| H | -1.08819400 | -0.63766500 | -2.73554000 |
| H | -2.77975100 | -0.94865300 | -2.29507500 |
| H | -4.25499900 | 0.87094200  | -1.50860000 |
| H | -0.23889900 | 1.68142900  | -2.76391700 |
| H | -0.72293900 | 4.12789900  | -2.72256400 |
| H | -4.74245500 | 3.30637100  | -1.46753800 |
| H | 6.38292600  | -2.40656600 | -2.80824400 |
| H | 2.14635400  | -1.71202000 | -3.03449800 |
| H | 3.84047500  | -3.34214300 | 0.53680300  |
| H | 6.11301900  | -3.26425000 | -0.49454900 |
| H | 4.39940100  | -1.63605700 | -4.08059500 |
| C | 0.28412100  | 0.09968000  | 1.07846200  |
| N | -0.43798800 | 0.29308600  | 2.19113200  |
| N | 1.54582500  | 0.41283600  | 1.43869200  |
| N | 0.32512400  | 0.68664800  | 3.25480700  |
| C | -1.85106800 | 0.11500000  | 2.33593400  |
| C | 1.52422700  | 0.76054500  | 2.75655300  |

|   |             |             |             |
|---|-------------|-------------|-------------|
| C | 2.79949700  | 0.42281500  | 0.68391200  |
| C | -2.69077000 | 1.14642700  | 1.91366700  |
| C | -2.30758500 | -1.11661000 | 2.81006900  |
| C | 2.83493200  | 1.04986800  | 3.40855000  |
| H | 2.68578600  | -0.26926100 | -0.14743700 |
| C | 4.00414200  | 0.00810200  | 1.59562100  |
| C | 3.13436200  | 1.81942500  | 0.21576400  |
| C | -4.06277500 | 0.89920500  | 1.94880800  |
| C | -2.12259800 | 2.43272100  | 1.37808900  |
| C | -3.68737600 | -1.30759400 | 2.83801300  |
| C | -1.33821000 | -2.17944100 | 3.25593000  |
| H | 2.73819200  | 0.99019900  | 4.49240300  |
| H | 3.19096300  | 2.05186600  | 3.13047300  |
| O | 3.72557100  | 0.03645400  | 2.99057500  |
| C | 5.14059200  | 0.98423300  | 1.21010400  |
| H | 4.26654700  | -1.03028500 | 1.39280300  |
| C | 4.45291500  | 2.14117600  | 0.52642800  |
| C | 2.29770300  | 2.71585700  | -0.44025100 |
| C | -4.57369600 | -0.32152400 | 2.39423700  |
| H | -4.74470100 | 1.67479900  | 1.60909400  |
| H | -1.66458000 | 2.26847500  | 0.39361600  |
| H | -1.35445700 | 2.83305600  | 2.04606500  |
| H | -2.90695900 | 3.18158400  | 1.25649800  |
| H | -4.08085900 | -2.25637200 | 3.19591700  |
| H | -0.89901800 | -1.91478000 | 4.22306100  |
| H | -0.51013000 | -2.29780100 | 2.54776800  |
| H | -1.84596500 | -3.13998200 | 3.36155600  |
| H | 5.70773100  | 1.27138200  | 2.10045700  |

|    |             |             |             |
|----|-------------|-------------|-------------|
| H  | 5.83574800  | 0.49056800  | 0.52182800  |
| C  | 4.96168300  | 3.39058700  | 0.18248700  |
| C  | 2.80801200  | 3.96761000  | -0.77627700 |
| H  | 1.27744500  | 2.43290300  | -0.68719200 |
| C  | -6.05448100 | -0.59675800 | 2.36941800  |
| C  | 4.12909900  | 4.30092400  | -0.46619500 |
| H  | 5.98746600  | 3.65559400  | 0.42112300  |
| H  | 2.17640300  | 4.68997700  | -1.28344000 |
| H  | -6.29793900 | -1.28274000 | 1.55113400  |
| H  | -6.38408400 | -1.06610500 | 3.29972700  |
| H  | -6.62811800 | 0.32042700  | 2.22317200  |
| H  | 4.51073300  | 5.28137800  | -0.73275800 |
| H  | -0.81479900 | -2.78118200 | 0.43257900  |
| Si | -2.44222700 | -3.64489700 | -1.29444000 |
| C  | -3.99974300 | -2.85932200 | -0.57291100 |
| H  | -4.19348500 | -1.84388900 | -0.92953400 |
| H  | -4.87487100 | -3.47341500 | -0.80896900 |
| H  | -3.90884800 | -2.81083700 | 0.51828800  |
| C  | -2.36679000 | -5.41012600 | -0.63376300 |
| H  | -2.32922600 | -5.41695000 | 0.46007100  |
| H  | -3.24636700 | -5.98298900 | -0.94491100 |
| H  | -1.47483000 | -5.92467300 | -1.00217900 |
| C  | -2.47508900 | -3.72132200 | -3.17554700 |
| H  | -1.60731900 | -4.28038500 | -3.53961500 |
| H  | -3.37233400 | -4.24938400 | -3.51371000 |
| H  | -2.46264500 | -2.73736100 | -3.64953200 |
| Cl | -3.08864900 | 5.56227100  | -2.02325400 |



## SR-TS4Cl

Zero-point correction= 0.772816 (Hartree/Particle)

|   |             |             |             |
|---|-------------|-------------|-------------|
| C | 0.21565100  | 0.27736600  | -0.31202000 |
| C | -0.77818500 | -2.41721700 | -1.17096500 |
| C | 1.59493400  | -1.88840900 | -1.12570600 |
| C | 0.46168300  | -2.18427200 | -1.86297100 |
| C | 1.54735300  | 0.26696200  | -0.75076600 |
| O | -0.85850800 | -2.46301000 | 0.07250400  |
| C | 1.76047100  | 0.83439100  | -2.13759000 |
| C | 1.53282300  | 2.32987700  | -2.14361200 |
| C | 1.09601600  | 5.08152100  | -2.04597300 |
| C | 2.54875400  | 3.20284000  | -1.74383800 |
| C | 0.29111500  | 2.86715700  | -2.49533400 |
| C | 0.06590200  | 4.24031300  | -2.44918000 |
| C | 2.34236800  | 4.57772900  | -1.69165400 |
| C | -2.01377300 | -2.67467800 | -1.98257300 |
| C | -4.34241400 | -3.19127500 | -3.43600900 |
| C | -2.92583700 | -3.63348700 | -1.53527100 |
| C | -2.28205200 | -1.96529300 | -3.15511100 |
| C | -3.44548300 | -2.21958200 | -3.87563000 |
| C | -4.08031600 | -3.89991400 | -2.26444500 |
| H | 0.46539400  | -2.18068600 | -2.94913700 |
| H | 2.36141800  | 0.34827900  | -0.03935600 |
| H | 2.77579000  | 0.62183500  | -2.48429900 |
| H | 1.05807400  | 0.34661800  | -2.82148100 |
| H | 3.52134800  | 2.80044800  | -1.46912800 |
| H | -0.50673300 | 2.19360600  | -2.79026600 |
| H | -0.89619400 | 4.65700800  | -2.72633500 |

|   |             |             |             |
|---|-------------|-------------|-------------|
| H | 3.13440700  | 5.25237000  | -1.38642100 |
| H | -5.24665200 | -3.39191300 | -4.00201600 |
| H | -2.71160100 | -4.16024500 | -0.60961600 |
| H | -1.59243900 | -1.18803500 | -3.47031900 |
| H | -3.65772500 | -1.65402500 | -4.77751600 |
| H | -4.77858200 | -4.65660500 | -1.91909000 |
| O | -0.77074000 | 0.30765800  | -1.08872200 |
| C | -0.11612500 | 0.16924500  | 1.14456000  |
| N | 0.58754300  | -0.21244700 | 2.22335200  |
| N | -1.30312200 | 0.58092500  | 1.64328700  |
| N | -0.12090900 | -0.06160400 | 3.38634600  |
| C | 1.96957200  | -0.59903800 | 2.33760700  |
| C | -1.26447100 | 0.41422300  | 2.99764100  |
| C | -2.46703800 | 1.22737100  | 1.03081000  |
| C | 2.28631600  | -1.95058300 | 2.48576500  |
| C | 2.91894100  | 0.42655000  | 2.41970200  |
| C | -2.40412800 | 0.97615900  | 3.78058400  |
| H | -2.16157900 | 1.56050900  | 0.03884400  |
| C | -2.94794900 | 2.42328200  | 1.91817000  |
| C | -3.67740500 | 0.32370200  | 0.96126200  |
| C | 3.63697700  | -2.26966600 | 2.64257200  |
| C | 1.21569800  | -3.00606200 | 2.53130500  |
| C | 4.25029500  | 0.05397300  | 2.58651400  |
| C | 2.50665100  | 1.87329100  | 2.33846700  |
| H | -2.13471300 | 1.04949100  | 4.83383600  |
| H | -3.30182900 | 0.35555800  | 3.67295800  |
| O | -2.60020000 | 2.29369700  | 3.29511500  |
| C | -4.47704900 | 2.44360600  | 1.72114600  |

|    |             |             |             |
|----|-------------|-------------|-------------|
| H  | -2.47649900 | 3.35518000  | 1.60080400  |
| C  | -4.82136300 | 1.02361800  | 1.34167200  |
| C  | -3.72340500 | -1.00756100 | 0.57061000  |
| C  | 4.62732200  | -1.28816700 | 2.68504400  |
| H  | 3.91610000  | -3.31494700 | 2.74963500  |
| H  | 0.50409800  | -2.90193200 | 1.70637700  |
| H  | 0.65290000  | -2.92128300 | 3.46708100  |
| H  | 1.66373300  | -4.00072200 | 2.49161000  |
| H  | 5.01032600  | 0.82899900  | 2.64393400  |
| H  | 2.10329100  | 2.11958000  | 1.34921800  |
| H  | 3.36103700  | 2.52480200  | 2.52706400  |
| H  | 1.73158400  | 2.09872900  | 3.07763400  |
| H  | -4.96831800 | 2.79241500  | 2.63325500  |
| H  | -4.74214300 | 3.13702400  | 0.91477300  |
| C  | -6.05918000 | 0.39089700  | 1.32540700  |
| C  | -4.96823800 | -1.63688900 | 0.55857400  |
| H  | -2.81292500 | -1.54199700 | 0.30960800  |
| C  | 6.08032700  | -1.66648600 | 2.79864200  |
| C  | -6.12275100 | -0.94497400 | 0.92888800  |
| H  | -6.95789500 | 0.92279000  | 1.62342700  |
| H  | -5.03546800 | -2.67575200 | 0.25211600  |
| H  | 6.20273200  | -2.62521400 | 3.30676200  |
| H  | 6.52438700  | -1.75859000 | 1.80143000  |
| H  | 6.64635500  | -0.90821000 | 3.34421000  |
| H  | -7.08128200 | -1.45424900 | 0.91490500  |
| Si | 3.33198200  | -2.18498300 | -1.78616800 |
| H  | 1.49034700  | -2.10563700 | -0.06202700 |
| C  | 3.78084100  | -3.92972800 | -1.22919800 |

|    |            |             |             |
|----|------------|-------------|-------------|
| H  | 3.06359100 | -4.66127000 | -1.61151600 |
| H  | 4.77969100 | -4.21229200 | -1.57669700 |
| H  | 3.77349200 | -3.99008000 | -0.13545800 |
| C  | 4.60423600 | -1.02406100 | -1.02021400 |
| H  | 4.52763100 | 0.00976400  | -1.36763300 |
| H  | 4.48926900 | -1.02208600 | 0.06902300  |
| H  | 5.61428900 | -1.37989700 | -1.24962800 |
| C  | 3.35938200 | -2.09851500 | -3.66649400 |
| H  | 2.71247100 | -2.87179700 | -4.09173200 |
| H  | 3.01982500 | -1.13099400 | -4.04590500 |
| H  | 4.37379500 | -2.27014800 | -4.03988400 |
| Cl | 0.82174400 | 6.80995300  | -1.98594600 |

SS-TS4Cl

Zero-point correction= 0.773492 (Hartree/Particle)

|    |             |             |             |
|----|-------------|-------------|-------------|
| C  | 0.12944200  | 0.09123200  | -0.68502600 |
| C  | 3.08228600  | 0.34770800  | -1.46241100 |
| C  | 1.44752900  | 1.64717100  | -2.68270800 |
| C  | 2.37016400  | 0.61472100  | -2.67496400 |
| C  | -0.36111800 | 0.84710400  | -1.77097800 |
| O  | 2.88472400  | 1.02070000  | -0.43266800 |
| Si | 1.69103000  | 3.29692300  | -1.77868500 |
| C  | 3.50641400  | 3.79694200  | -1.79081400 |
| C  | 0.98156600  | 3.53718300  | -0.04722100 |
| C  | 0.74842700  | 4.52650000  | -2.87383300 |
| C  | -0.79568900 | 0.04599000  | -2.98378300 |
| C  | -1.98453900 | -0.83707000 | -2.67400100 |
| C  | -4.17734700 | -2.44996000 | -2.06024900 |

|   |             |             |             |
|---|-------------|-------------|-------------|
| C | -3.28556800 | -0.32555200 | -2.70924600 |
| C | -1.80695200 | -2.17730700 | -2.31589600 |
| C | -2.89731700 | -2.98889600 | -2.01055500 |
| C | -4.38649100 | -1.11945200 | -2.40292000 |
| C | 4.05095700  | -0.79573800 | -1.44812600 |
| C | 5.82553300  | -2.94939600 | -1.35605100 |
| C | 4.02583200  | -1.68126700 | -0.37186300 |
| C | 4.96477100  | -0.99641700 | -2.48443200 |
| C | 5.85837500  | -2.06432600 | -2.43151900 |
| C | 4.90111800  | -2.75999600 | -0.32899400 |
| H | 0.92723600  | 1.78037300  | -3.63498700 |
| H | 2.43788200  | -0.10367500 | -3.48700500 |
| H | -0.87508100 | 1.78320600  | -1.57977500 |
| H | 3.62234500  | 4.81575100  | -1.40638800 |
| H | 3.91127100  | 3.77216100  | -2.80678600 |
| H | 4.09286800  | 3.11847700  | -1.16780200 |
| H | 1.27775800  | 4.53431700  | 0.29807200  |
| H | -0.11303300 | 3.50480800  | -0.02558000 |
| H | 1.38344200  | 2.80311100  | 0.65368400  |
| H | 1.14198500  | 4.53505600  | -3.89540100 |
| H | -0.31578900 | 4.26917400  | -2.93212400 |
| H | 0.82053400  | 5.54528000  | -2.47942900 |
| H | -1.04868800 | 0.72320300  | -3.80634500 |
| H | 0.04539600  | -0.57612600 | -3.30528600 |
| H | -3.44334600 | 0.71261000  | -2.99515900 |
| H | -0.79970800 | -2.57947100 | -2.26857100 |
| H | -2.75710400 | -4.03009800 | -1.74005500 |
| H | -5.39343100 | -0.71773000 | -2.43129400 |

|   |             |             |             |
|---|-------------|-------------|-------------|
| H | 6.51452800  | -3.78787000 | -1.32218100 |
| H | 3.28400700  | -1.52609200 | 0.40022000  |
| H | 4.98378500  | -0.30572200 | -3.32330200 |
| H | 6.57863900  | -2.20786300 | -3.23105200 |
| H | 4.85336400  | -3.45904100 | 0.50202400  |
| O | 0.70336300  | -1.01194600 | -0.80228500 |
| C | -0.09565100 | 0.63226800  | 0.70556500  |
| N | 0.61266100  | 0.44152800  | 1.82915400  |
| N | -1.18516200 | 1.34248100  | 1.10447600  |
| N | 0.03322100  | 1.04610000  | 2.91216800  |
| C | 1.74436900  | -0.40556000 | 2.12515800  |
| C | -1.05042100 | 1.57819000  | 2.44376200  |
| C | -2.52221900 | 1.51120400  | 0.50899100  |
| C | 1.50543400  | -1.77961400 | 2.22472700  |
| C | 2.94954500  | 0.19024000  | 2.51576300  |
| C | -2.10068900 | 2.39182300  | 3.12830400  |
| H | -2.42574200 | 1.56578700  | -0.57154800 |
| C | -3.22564300 | 2.79611500  | 1.07441800  |
| C | -3.42256000 | 0.36986400  | 0.91304100  |
| C | 2.56409000  | -2.58533900 | 2.64922800  |
| C | 0.16342900  | -2.38050400 | 1.90755200  |
| C | 3.96778300  | -0.66202100 | 2.93468300  |
| C | 3.16842800  | 1.67741000  | 2.49165100  |
| H | -1.66729000 | 2.92324300  | 3.97584000  |
| H | -2.91500200 | 1.74739600  | 3.48888300  |
| O | -2.55521600 | 3.34892700  | 2.19483200  |
| C | -4.67222100 | 2.35062300  | 1.40241300  |
| H | -3.20467000 | 3.59418800  | 0.33127500  |

|    |             |             |             |
|----|-------------|-------------|-------------|
| C  | -4.63348300 | 0.84199100  | 1.40979400  |
| C  | -3.14934100 | -0.98822900 | 0.80555200  |
| C  | 3.80098200  | -2.04666800 | 2.99613200  |
| H  | 2.40631900  | -3.65850500 | 2.72103200  |
| H  | 0.00495900  | -2.37660400 | 0.82462700  |
| H  | -0.64867700 | -1.81260800 | 2.37593100  |
| H  | 0.11162400  | -3.40671200 | 2.27535900  |
| H  | 4.92095000  | -0.22777600 | 3.22679000  |
| H  | 2.28929500  | 2.22213100  | 2.84433200  |
| H  | 3.38468600  | 1.98814700  | 1.46644700  |
| H  | 4.01331700  | 1.94122200  | 3.13076700  |
| H  | -4.98699300 | 2.78445000  | 2.35684900  |
| H  | -5.36391500 | 2.72080900  | 0.63868000  |
| C  | -5.61284700 | -0.06237200 | 1.81207000  |
| C  | -4.12770200 | -1.88906800 | 1.21606100  |
| H  | -2.20651600 | -1.33921100 | 0.38968200  |
| C  | 4.94153700  | -2.92540000 | 3.43933000  |
| C  | -5.34970400 | -1.42742200 | 1.71212500  |
| H  | -6.56433600 | 0.28840700  | 2.20033200  |
| H  | -3.94781700 | -2.95608000 | 1.13054600  |
| H  | 5.80145300  | -2.79969800 | 2.77407800  |
| H  | 5.26830200  | -2.66366200 | 4.45005300  |
| H  | 4.65670400  | -3.97984500 | 3.43457500  |
| H  | -6.10469100 | -2.14337100 | 2.02082200  |
| Cl | -5.55037100 | -3.46028900 | -1.66489600 |

Si-TS1'

Zero-point correction= 0.632923 (Hartree/Particle)

|   |             |             |             |
|---|-------------|-------------|-------------|
| C | -1.02743700 | 3.28874100  | 0.92486200  |
| C | -3.67468900 | 4.12070400  | 0.44566400  |
| C | -1.46010100 | 4.54910900  | 1.34050800  |
| C | -1.93200800 | 2.46270400  | 0.27719600  |
| C | -3.24318800 | 2.86968200  | 0.02566200  |
| C | -2.77328500 | 4.95686500  | 1.10777000  |
| C | -3.99077700 | 1.79030300  | -0.72746400 |
| C | -2.85841000 | 0.93384900  | -1.30347900 |
| C | -1.73861400 | 1.05680200  | -0.24506300 |
| N | -0.44124100 | 0.79043600  | -0.83467600 |
| C | -0.21793800 | 0.79012000  | -2.18619700 |
| C | -1.36870300 | 0.90737200  | -3.13390400 |
| O | -2.44936800 | 1.56418000  | -2.50989000 |
| N | 1.02696400  | 0.54440300  | -2.45242000 |
| N | 1.57706200  | 0.36153900  | -1.20662400 |
| C | 0.70790200  | 0.47056800  | -0.18522800 |
| C | 2.96661900  | 0.05616700  | -1.07590900 |
| C | 5.65726400  | -0.54245200 | -0.75492300 |
| C | 3.42017400  | -1.20669800 | -1.46717700 |
| C | 3.81904800  | 1.04212100  | -0.56666100 |
| C | 5.16486400  | 0.71994300  | -0.41571900 |
| C | 4.77638000  | -1.48513800 | -1.28364200 |
| C | 2.49867800  | -2.21186200 | -2.10762200 |
| C | 3.29283300  | 2.40221300  | -0.18971800 |
| H | -0.00429000 | 2.96092100  | 1.08663700  |
| H | -4.69016300 | 4.45206600  | 0.24976900  |



|    |             |             |             |
|----|-------------|-------------|-------------|
| H  | -0.76957900 | 5.21783600  | 1.84394800  |
| H  | -3.09491700 | 5.94063300  | 1.43429800  |
| H  | -4.60869400 | 1.18836200  | -0.05129900 |
| H  | -4.62940400 | 2.17211200  | -1.52729100 |
| H  | -3.13046200 | -0.11301800 | -1.49327100 |
| H  | -1.88940200 | 0.32072900  | 0.55411100  |
| H  | -1.65349000 | -0.11102500 | -3.43960100 |
| H  | -1.09183800 | 1.48237100  | -4.01820100 |
| H  | 5.84558200  | 1.47061500  | -0.02096400 |
| H  | 5.15187000  | -2.46433300 | -1.57112800 |
| H  | 2.89025500  | -3.22288200 | -1.97704900 |
| H  | 2.42548000  | -2.01319500 | -3.18197500 |
| H  | 1.48078500  | -2.16481100 | -1.70933700 |
| H  | 4.11668100  | 3.09050400  | 0.00694400  |
| H  | 2.67065300  | 2.81874400  | -0.98729400 |
| H  | 2.66825300  | 2.34670000  | 0.70891700  |
| C  | -1.28454200 | -2.11220800 | -0.02502500 |
| C  | -0.65946500 | -1.58011600 | 1.14828800  |
| H  | -1.26472800 | -1.42688800 | 2.03798400  |
| C  | 0.64575600  | -1.07483700 | 1.09709000  |
| H  | 1.29513700  | -1.57493000 | 0.37573400  |
| O  | -0.77652400 | -2.02527000 | -1.15849400 |
| C  | 7.10933400  | -0.87999000 | -0.53498500 |
| H  | 7.28006300  | -1.18912100 | 0.50133000  |
| H  | 7.42858600  | -1.69891800 | -1.18304800 |
| H  | 7.74912500  | -0.01587200 | -0.72966500 |
| Si | 1.46299000  | -0.52287600 | 2.70856500  |
| C  | 3.31557700  | -0.27839600 | 2.48129200  |

|   |             |             |             |
|---|-------------|-------------|-------------|
| H | 3.55765000  | 0.72194500  | 2.11471400  |
| H | 3.82971400  | -0.41683400 | 3.43777200  |
| H | 3.72880400  | -0.99847300 | 1.76609500  |
| C | 1.18333800  | -1.90924900 | 3.95513300  |
| H | 1.64870900  | -1.66618300 | 4.91571700  |
| H | 0.11641200  | -2.07821200 | 4.12764900  |
| H | 1.61450300  | -2.84937000 | 3.59844100  |
| C | 0.63728600  | 1.05171200  | 3.32682800  |
| H | 0.78364400  | 1.17854400  | 4.40366700  |
| H | 1.05224100  | 1.93091600  | 2.82573600  |
| H | -0.44040100 | 1.03521900  | 3.13130900  |
| C | -2.65548600 | -2.73057800 | 0.09498600  |
| C | -3.40217700 | -2.90757200 | -1.07401500 |
| C | -3.19953200 | -3.14265000 | 1.31535000  |
| C | -4.67808300 | -3.45802900 | -1.02449000 |
| H | -2.94988700 | -2.61220200 | -2.01567500 |
| C | -4.47360300 | -3.70107000 | 1.36602800  |
| H | -2.61690300 | -3.05194900 | 2.22642400  |
| C | -5.21827500 | -3.85311200 | 0.19826800  |
| H | -5.25036000 | -3.58526300 | -1.93807100 |
| H | -4.88372700 | -4.02399200 | 2.31763200  |
| H | -6.21255600 | -4.28650600 | 0.24000500  |

*Re-TS1'*

Zero-point correction= 0.633129 (Hartree/Particle)

|   |            |             |            |
|---|------------|-------------|------------|
| C | 3.66839400 | -1.62332900 | 0.40960800 |
| C | 6.13671600 | -0.29601800 | 0.14387600 |
| C | 4.86633500 | -2.33596700 | 0.47578500 |

|   |             |             |             |
|---|-------------|-------------|-------------|
| C | 3.72528200  | -0.25213900 | 0.20747700  |
| C | 4.94458000  | 0.41303900  | 0.07178900  |
| C | 6.08862600  | -1.67633000 | 0.34615600  |
| C | 4.71583000  | 1.89376900  | -0.13843200 |
| C | 3.24685400  | 1.96338800  | -0.57039900 |
| C | 2.59656100  | 0.75038500  | 0.13547500  |
| N | 1.42064600  | 0.29700600  | -0.59309000 |
| C | 1.10839000  | 0.72645600  | -1.85679300 |
| C | 1.92067400  | 1.80222400  | -2.50458300 |
| O | 3.22915000  | 1.78455400  | -1.98101400 |
| N | 0.04676700  | 0.12928100  | -2.30352300 |
| N | -0.30636100 | -0.69635700 | -1.26204200 |
| C | 0.48834400  | -0.60510400 | -0.17627700 |
| C | -1.45944100 | -1.53204700 | -1.36593900 |
| C | -3.68551800 | -3.19729800 | -1.46355000 |
| C | -2.72767100 | -0.95197700 | -1.45957200 |
| C | -1.26577000 | -2.92148000 | -1.39226400 |
| C | -2.39556400 | -3.73448100 | -1.42251400 |
| C | -3.82814600 | -1.81245200 | -1.50381900 |
| C | -2.93222300 | 0.53674200  | -1.57085600 |
| C | 0.11802000  | -3.51335500 | -1.48198200 |
| H | 2.70902100  | -2.12574700 | 0.50214900  |
| H | 7.09083100  | 0.21072300  | 0.03265500  |
| H | 4.84744900  | -3.41053200 | 0.62584300  |
| H | 7.01227400  | -2.24406500 | 0.39591500  |
| H | 4.86118200  | 2.44961500  | 0.79463900  |
| H | 5.35998100  | 2.33571400  | -0.90230800 |
| H | 2.73394100  | 2.89476300  | -0.30168600 |

|    |             |             |             |
|----|-------------|-------------|-------------|
| H  | 2.26448300  | 1.06920300  | 1.12687000  |
| H  | 1.43838800  | 2.77359000  | -2.31608000 |
| H  | 1.98400400  | 1.63994300  | -3.58115200 |
| H  | -2.26655600 | -4.81412200 | -1.43535800 |
| H  | -4.82432100 | -1.38035900 | -1.56563400 |
| H  | -3.84761300 | 0.83897700  | -1.05506200 |
| H  | -3.02857200 | 0.82116900  | -2.62356300 |
| H  | -2.09954800 | 1.10139200  | -1.15349400 |
| H  | 0.07103400  | -4.60330600 | -1.44191400 |
| H  | 0.58783100  | -3.22340600 | -2.42759400 |
| H  | 0.76810700  | -3.16109400 | -0.67901200 |
| C  | -0.74283800 | 2.20265500  | 1.03387800  |
| C  | -1.20728700 | 0.87962700  | 1.36102100  |
| H  | -2.25747800 | 0.64553600  | 1.21875900  |
| C  | -0.31713900 | -0.14596300 | 1.66067400  |
| H  | 0.66704700  | 0.18532500  | 1.99908000  |
| O  | 0.46082100  | 2.49846100  | 0.95713700  |
| C  | -4.89190500 | -4.09947900 | -1.44675000 |
| H  | -4.69627200 | -5.03235500 | -1.98082300 |
| H  | -5.16161900 | -4.35862000 | -0.41757200 |
| H  | -5.75661000 | -3.61387400 | -1.90417300 |
| Si | -0.93772000 | -1.70897900 | 2.52218900  |
| C  | 0.12863800  | -3.21184800 | 2.15257600  |
| H  | 1.18904600  | -2.94670600 | 2.09903400  |
| H  | 0.00842400  | -3.96081700 | 2.94170000  |
| H  | -0.16218400 | -3.67288400 | 1.20545000  |
| C  | -2.72645100 | -2.06447400 | 2.07214400  |
| H  | -3.09053400 | -2.91132800 | 2.66340700  |

|   |             |             |             |
|---|-------------|-------------|-------------|
| H | -3.37354100 | -1.20848400 | 2.28632200  |
| H | -2.83301300 | -2.32040400 | 1.01421600  |
| C | -0.82047900 | -1.31454100 | 4.36275200  |
| H | -1.19846600 | -2.14853200 | 4.96258600  |
| H | 0.21557000  | -1.12838100 | 4.66203800  |
| H | -1.40601600 | -0.42423600 | 4.60926600  |
| C | -1.76157900 | 3.27154700  | 0.72675200  |
| C | -1.32808700 | 4.41379400  | 0.04780800  |
| C | -3.10795400 | 3.16986300  | 1.09163300  |
| C | -2.22232700 | 5.42651700  | -0.27921000 |
| H | -0.27700200 | 4.48500400  | -0.21139200 |
| C | -4.00327900 | 4.18665100  | 0.77192500  |
| H | -3.45705200 | 2.30637600  | 1.64848700  |
| C | -3.56415300 | 5.31374600  | 0.08094300  |
| H | -1.87538900 | 6.30565000  | -0.81310000 |
| H | -5.04419700 | 4.10159200  | 1.06740200  |
| H | -4.26427600 | 6.10403600  | -0.17093300 |
